# Supplementary material for: A Lipidomic Analysis of Docosahexaenoic Acid (22:6, ω3) Mediated Attenuation of Western Diet Induced Nonalcoholic Steatohepatitis in Male Ldlr -/- Mice
Source: MDPI journal article supplement (doi:10.3390/metabo9110252), 2019-10-28
Supplement: s1 [file s1]

## Supplementary Materials

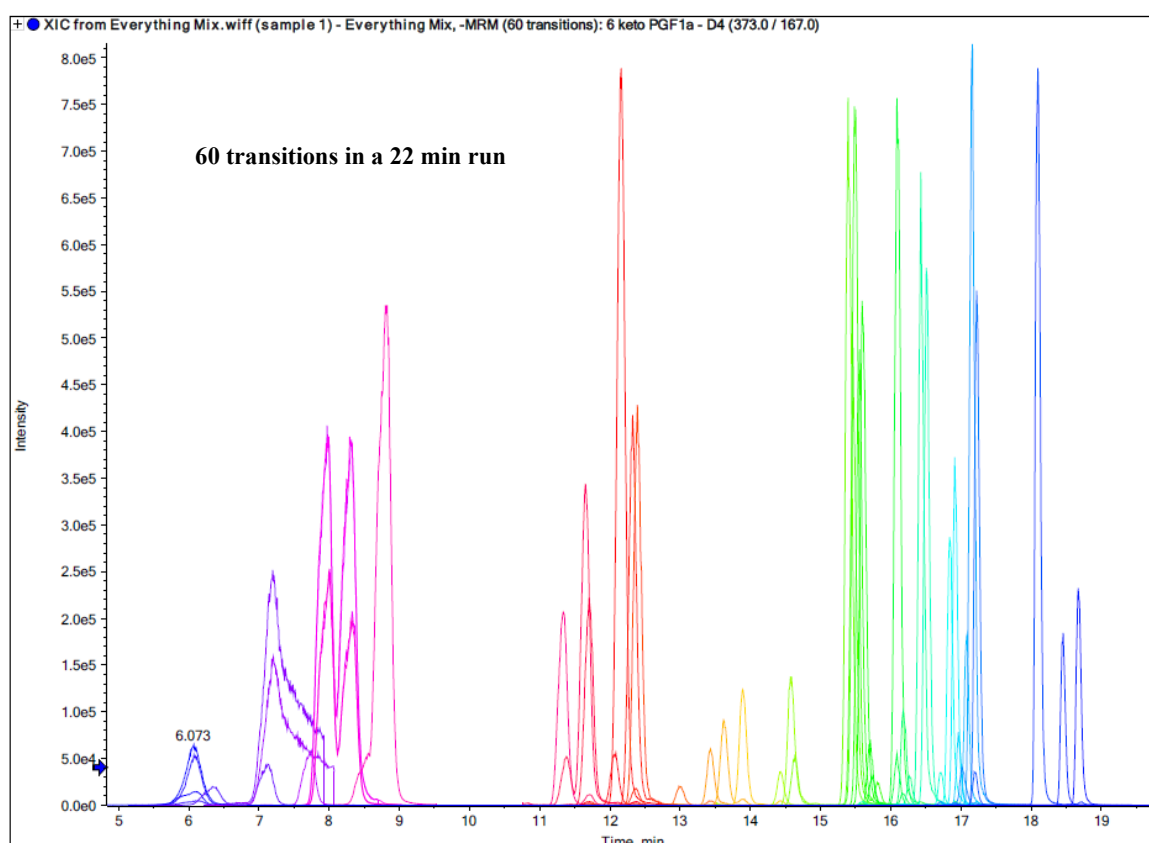

**Figure 1.** LC-MS/MS chromatogram of 60 transitions in a 22 min LC-run allowing monitoring 39 oxylipins, 17 deuterated oxylipins, CUDA, and the deuterated surrogates eicosapentaenoic acid-d5 (EPA-d5), docosahexaenoic acid-d5 (DHA-d5), and arachidonic acid-d8 (ARA-d8). Analysis were performed on a SCIEX linear ion trap (LIT) QTRAP 4000 using the dMRM method implemented from Pedersen et al., [80]. The use of a quadrupole mass spectrometer with a linear ion trap significantly enhances platform performance by increasing ion capacity, improving injection and trapping efficiencies, and increasing duty cycle.

**Table S1.** Diet effects on all lipids. See zip file

**Table S2.** Lipids significantly affected by diet. See zip file

**Table S3.** Detailed list of multi-reaction monitoring (MRM) transitions for the deuterated-oxylipins (surrogates) and CUDA (12-[(cyclohexylamino) carbonyl] amino]-dodecanoic acid) used as internal standards for our analysis. Compounds are ordered based on retention time (RT).

| Surrogates                       | Precursor Ion | Product Ion | RT   | DP  | CE  | S/N     | LOD (ng/μl) | LOQ (ng/μl) |
|----------------------------------|---------------|-------------|------|-----|-----|---------|-------------|-------------|
| <b>6 keto PGF1α - d4</b>         | 373           | 167         | 6.0  | -70 | -40 | 5.7     | 0.084       | 0.281       |
| <b>Resolvin E1 - d4</b>          | 353           | 197         | 6.0  | -40 | -20 | 11.4    | 0.042       | 0.140       |
| <b>Thromboxane B2 - d4</b>       | 373           | 173         | 7.1  | -50 | -21 | 24.6    | 0.020       | 0.065       |
| <b>PGF2α - d4</b>                | 357           | 197         | 7.6  | -70 | -33 | 2.8     | 0.171       | 0.571       |
| <b>PGE2 - d4</b>                 | 355           | 275         | 7.9  | -35 | -25 | 43.6    | 0.011       | 0.037       |
| <b>PGD2 - d4</b>                 | 355           | 275         | 8.2  | -35 | -25 | 65.3    | 0.007       | 0.025       |
| <b>Resolvin D1 - d5</b>          | 380           | 141         | 8.7  | -40 | -20 | 1.5     | 0.320       | 1.067       |
| <b>Leukotriene B4 - d4</b>       | 339           | 197         | 11.6 | -70 | -21 | 60.8    | 0.008       | 0.026       |
| <b>CUDA</b>                      | 339           | 214         | 12.1 | -65 | -35 | 1310.3  | 0.000       | 0.001       |
| <b>12,13-DiHOME - d4</b>         | 317           | 185         | 12.3 | -70 | -30 | 52.3    | 0.009       | 0.031       |
| <b>20-HETE - d6</b>              | 325           | 281         | 14.5 | -65 | -24 | 3.1     | 0.155       | 0.516       |
| <b>13(S)-HODE - d4</b>           | 299           | 198         | 15.3 | -65 | -25 | 30.5    | 0.016       | 0.053       |
| <b>9(S)-HODE - d4</b>            | 299           | 172         | 15.4 | -60 | -25 | 5.3     | 0.091       | 0.302       |
| <b>15(S)-HETE - d8</b>           | 327           | 226         | 15.5 | -70 | -16 | 63602.5 | 0.000       | 0.000       |
| <b>12(S)-HETE - d8</b>           | 327           | 184         | 16.0 | -60 | -21 | 15      | 0.032       | 0.107       |
| <b>5(S)-HETE - d8</b>            | 327           | 116         | 16.4 | -50 | -20 | 35.6    | 0.014       | 0.045       |
| <b>14,15 - EET(EpETRe) - d11</b> | 330           | 175         | 16.8 | -70 | -16 | 48.3    | 0.010       | 0.033       |
| <b>11,12-EET (EpETRe)- d11</b>   | 330           | 167         | 17.1 | -55 | -15 | 8.8     | 0.055       | 0.182       |
| <b>EPA - d5</b>                  | 306           | 262         | 18.1 | -55 | -20 | 5.4     | 0.089       | 0.296       |
| <b>DHA - d5</b>                  | 332           | 234         | 18.4 | -55 | -20 | 10.5    | 0.046       | 0.152       |
| <b>ARA - d8</b>                  | 311           | 267         | 18.6 | -60 | -18 | 15.2    | 0.032       | 0.105       |

RT: retention time (min); DP: declustering potential (V); CE: collision energy (V); S/N: Signal to noise ratio; LOD: limit of detection; LOQ: limit of quantification.

**Table 4.** Detailed list of multi-reaction monitoring (MRM) transitions for the oxylipins contained in our *in-house* library. Compounds are ordered based on retention time (RT).

| Precursor | Pathway     | Compound       | Precursor Ion | Product Ion | RT   | DP  | CE  | S/N     | LOD (ng/μl) | LOQ (ng/μl) |
|-----------|-------------|----------------|---------------|-------------|------|-----|-----|---------|-------------|-------------|
| C20:4     | COX         | 6-keto PGF1α   | 369           | 163         | 6.0  | -70 | -40 | 21.3    | 0.023       | 0.075       |
| C20:5     | COX         | Resolvin E1    | 349           | 195         | 6.1  | -40 | -20 | 6.7     | 0.072       | 0.239       |
| C20:5     | ROS         | 8-iso PGF3α    | 351           | 307         | 6.3  | -80 | -26 | 11.4    | 0.042       | 0.140       |
| C20:4     | COX         | 8-iso PGF2α    | 353           | 193         | 7.1  | -70 | -33 | 5.9     | 0.081       | 0.271       |
| C20:4     | COX         | Thromboxane B2 | 369           | 169         | 7.2  | -50 | -21 | 309.7   | 0.002       | 0.005       |
| C20:4     | COX         | PGE2           | 351           | 271         | 7.9  | -35 | -25 | 651.8   | 0.001       | 0.003       |
| C20:4     | COX         | PGD2           | 351           | 271         | 8.3  | -35 | -25 | 505.8   | 0.001       | 0.003       |
| C22:6     | LOX         | Resolvin D1    | 375           | 121         | 8.8  | -40 | -20 | 10      | 0.048       | 0.160       |
| C22:6     | LOX         | PDX            | 359           | 153         | 11.3 | -20 | -20 | 6186.1  | 0.000       | 0.000       |
| C20:5     | CYPEPOX/sEH | 17,18-DiHETE   | 335           | 203         | 11.4 | -60 | -22 | 3689.7  | 0.000       | 0.000       |
| C20:4     | LOX5        | Leukotriene B4 | 335           | 195         | 11.6 | -70 | -21 | 2163.1  | 0.000       | 0.001       |
| C20:5     | CYPEPOX/sEH | 14,15-DiHETE   | 335           | 111         | 11.8 | -55 | -22 | 810.4   | 0.001       | 0.002       |
| C20:5     | CYPEPOX/sEH | 11,12-DiHETE   | 335           | 167         | 12.0 | -55 | -22 | 1380.4  | 0.000       | 0.001       |
| C20:5     | CYPEPOX/sEH | 8,9-DiHETE     | 335           | 185         | 12.3 | -55 | -22 | 7       | 0.069       | 0.229       |
| C18:2     | CYPEPOX/sEH | 12,13-DiHOME   | 313           | 183         | 12.3 | -70 | -30 | 1262.4  | 0.000       | 0.001       |
| C20:5     | CYPEPOX/sEH | 5,6-DiHETE     | 335           | 145         | 12.9 | -55 | -22 | 17.7    | 0.027       | 0.090       |
| C22:6     | CYPEPOX/sEH | 19,20-DiHDPA   | 361           | 229         | 12.9 | -74 | -24 | 1.3     | 0.369       | 1.231       |
| C20:4     | CYPEPOX/sEH | 14,15-DiHET    | 337           | 207         | 13.0 | -65 | -25 | 38.8    | 0.012       | 0.041       |
| C22:6     | CYPEPOX/sEH | 16,17-DiHDPA   | 361           | 233         | 13.3 | -80 | -24 | 8.6     | 0.056       | 0.186       |
| C22:6     | CYPEPOX/sEH | 13,14-DiHDPA   | 361           | 193         | 13.6 | -80 | -24 | 39.9    | 0.012       | 0.040       |
| C22:6     | CYPEPOX/sEH | 10,11-DiHDPA   | 361           | 153         | 13.8 | -80 | -24 | 23.4    | 0.021       | 0.068       |
| C22:6     | CYPEPOX/sEH | 7,8-DiHDPA     | 361           | 127         | 14.4 | -80 | -24 | 25.8    | 0.019       | 0.062       |
| C20:4     | CYPOH       | 20-HETE        | 319           | 245         | 14.6 | -65 | -24 | 42.7    | 0.011       | 0.038       |
| C18:2     | LOX12/15    | 13(S)-HODE     | 295           | 195         | 15.4 | -65 | -25 | 2871    | 0.000       | 0.001       |
| C18:2     | LOX5        | 9(S)-HODE      | 295           | 171         | 15.5 | -60 | -25 | 2743.5  | 0.000       | 0.001       |
| C20:4     | LOX12/15    | 15-HETE        | 319           | 175         | 15.7 | -70 | -16 | 8.7     | 0.055       | 0.184       |
| C20:5     | CYPEPOX     | 17,18-EpETE    | 317           | 215         | 15.7 | -55 | -15 | 34.8    | 0.014       | 0.046       |
| C20:5     | CYPEPOX     | 14,15-EpETE    | 317           | 248         | 16.0 | -45 | -15 | 7754.4  | 0.000       | 0.000       |
| C20:5     | CYPEPOX     | 11,12-EpETE    | 317           | 195         | 16.1 | -70 | -16 | 17.3    | 0.028       | 0.093       |
| C20:4     | LOX12/15    | 12-HETE        | 319           | 135         | 16.1 | -60 | -21 | 50.3    | 0.010       | 0.032       |
| C20:5     | CYPEPOX     | 8,9-EpETE      | 317           | 155         | 16.3 | -75 | -16 | 3721.6  | 0.000       | 0.000       |
| C20:4     | LOX5        | 5-HETE         | 319           | 115         | 16.5 | -50 | -20 | 80.6    | 0.006       | 0.020       |
| C22:6     | CYPEPOX     | 19,20-EpDPA    | 343           | 241         | 16.7 | -45 | -20 | 11.4    | 0.042       | 0.140       |
| C20:4     | CYPEPOX     | 14,15-EET      | 319           | 175         | 16.9 | -70 | -16 | 1924.7  | 0.000       | 0.001       |
| C22:6     | CYPEPOX     | 16,17-EpDPA    | 343           | 274         | 16.9 | -55 | -15 | 55832.9 | 0.000       | 0.000       |
| C22:6     | CYPEPOX     | 10,11-EpDPA    | 343           | 153         | 17.0 | -55 | -15 | 152.8   | 0.003       | 0.011       |
| C22:6     | CYPEPOX     | 13,14-EpDPA    | 343           | 161         | 17.2 | -55 | -15 | 2.5     | 0.192       | 0.640       |
| C20:4     | CYPEPOX     | 11,12-EET      | 319           | 167         | 17.2 | -55 | -15 | 985.6   | 0.001       | 0.002       |
| C22:6     | CYPEPOX     | 7,8-EpDPA      | 343           | 113         | 17.2 | -55 | -15 | 11.5    | 0.042       | 0.139       |

COX: cyclooxygenases; LOX: lipoxygenases; ROS: reactive oxygen species; CYPEPOX/sEH: cytochrome P450 epoxide/soluble epoxy hydrolase; CYPOH: CYP omega hydroxylases; RT: retention time (min); DP: declustering potential (V); CE: collision energy (V); S/N: Signal to noise ratio; LOD: limit of detection; LOQ: limit of quantification.
