# Supplementary material for: A Lipidomic Analysis of Docosahexaenoic Acid (22:6, ω3) Mediated Attenuation of Western Diet Induced Nonalcoholic Steatohepatitis in Male Ldlr -/- Mice
Source: Metabolites. 2019 Oct 28;9(11):252. doi: 10.3390/metabo9110252 (PMC6918288; doi:10.3390/metabo9110252)
Supplement: Supplementary file 1 [file metabolites-09-00252-s001.zip]

Archive with 4 entries (4 files):
- Supplementary Materials.pdf
- SWATH parameters_SI.pdf
- Table S1 Diet effets on hepatic lipids.xlsx
- Table S2 ANOVA of Lipid Data.xlsx
