# Supplementary material for: A Lipidomic Analysis of Docosahexaenoic Acid (22:6, ω3) Mediated Attenuation of Western Diet Induced Nonalcoholic Steatohepatitis in Male Ldlr -/- Mice
Source: Metabolites. 2019 Oct 28;9(11):252. doi: 10.3390/metabo9110252 (PMC6918288; doi:10.3390/metabo9110252)
Supplement: Supplementary file 1 [file metabolites-09-00252-s001.zip › Table S1 Diet effets on hepatic lipids.xlsx]

## Sheet: data_original
			Animal #		616	617	618	619	620		627	629	630	631		632	634	635	636	637	639		640	641	642	643	644	646	647			Average					Stdev					Sterr
		Lipid	Group ID	units	RD30	RD30	RD30	RD30	RD30		WD22	WD22	WD22	WD22		WDO30	WDO30	WDO30	WDO30	WDO30	WDO30		WDD30	WDD30	WDD30	WDD30	WDD30	WDD30	WDD30		Lipid	RD30	WD22	WDO30	WDD30		RD30	WD22	WDO30	WDD30		RD30	WD22	WDO30	WDD30
1	GC Data	C14:0		nmol/mg protein	0.0256278	0.0178155	0.0138512	0.0103717	0.0235723		0.0757403	0.0594506	0.103595	0.0604781		0.0543593	0.0623399	0.0509549	0.0917213	0.0935492	0.0578858		0.0947694	0.0328166	0.0450036	0.0582188	0.0365295	0.0369893	0.0410866		C14:0	0.0182477	0.074816	0.0684684	0.0493448		0.00641024	0.0205812	0.0191054	0.0216766		0.00286675	0.0102906	0.00779975	0.00819299
2	GC Data	C16:0		nmol/mg protein	0.894035	0.661467	0.602729	0.549576	0.793318		1.88785	1.29017	1.81529	1.18269		1.5999	1.56632	1.39556	1.69916	1.92011	1.45439		1.98834	0.880249	1.32624	1.45354	0.919892	0.888569	1.33682		C16:0	0.700225	1.544	1.60591	1.25624		0.14136	0.359076	0.187736	0.403314		0.0632183	0.179538	0.0766429	0.152438
3	GC Data	C16:1 w7		nmol/mg protein	0.142564	0.0955972	0.0739376	0.0521837	0.0996644		0.381927	0.31635	0.5144	0.287289		0.26935	0.286195	0.220499	0.329579	0.3123	0.228715		0.540154	0.128673	0.204567	0.342808	0.145842	0.142655	0.192656		C16:1 w7	0.0927893	0.374992	0.27444	0.242479		0.0336781	0.101017	0.0439048	0.149917		0.0150613	0.0505085	0.0179241	0.0566635
4	GC Data	C18:0		nmol/mg protein	0.165335	0.112116	0.112909	0.119055	0.154943		0.153989	0.0886193	0.126817	0.127426		0.141113	0.148525	0.118929	0.13096	0.174108	0.123456		0.197608	0.114241	0.151728	0.134376	0.112806	0.107331	0.139569		C18:0	0.132872	0.124213	0.139515	0.136808		0.0253041	0.0268987	0.0201756	0.0313237		0.0113164	0.0134494	0.00823664	0.0118393
5	GC Data	C18:1 w9		nmol/mg protein	0.695859	0.451747	0.370482	0.336941	0.521245		2.81807	1.88484	2.68249	1.62923		2.5052	2.58592	2.1338	2.58217	3.14757	2.15434		2.78362	0.91997	1.73537	1.94207	1.0166	0.94442	1.58144		C18:1 w9	0.475255	2.25366	2.51817	1.5605		0.14269	0.585489	0.370166	0.678025		0.0638131	0.292744	0.15112	0.256269
6	GC Data	C18:1 w7		nmol/mg protein	0.0375526	0.0253566	0.025912	0.023942	0.0300691		0.265244	0.147074	0.240597	0.164827		0.209464	0.221539	0.175826	0.208498	0.241606	0.151652		0.101933	0.0398152	0.0797535	0.0668697	0.0374327	0.0358599	0.0646316		C18:1 w7	0.0285665	0.204435	0.201431	0.0608994		0.00551686	0.0573425	0.0324543	0.0248698		0.00246722	0.0286713	0.0132494	0.0093999
7	GC Data	C18:2 w6		nmol/mg protein	0.981215	0.663987	0.511904	0.509012	0.760105		0.202325	0.189961	0.215854	0.168602		0.166973	0.177839	0.142645	0.206418	0.219531	0.152497		0.291054	0.137096	0.191879	0.198065	0.147014	0.142915	0.176928		C18:2 w6	0.685245	0.194186	0.17765	0.183564		0.196697	0.0200677	0.0301781	0.0532683		0.0879657	0.0100339	0.0123201	0.0201335
8	GC Data	C18:3 w6		nmol/mg protein	0.017047	0.0107871	0.00791494	0.00704098	0.0144194		0.00422215	0.00470578	0.00570172	0.00368997		0.00358637	0.0028849	0.00311609	0.00481039	0.00426371	0.00389398		0.00143189	0.000860753	0.00107332	0.00134976	0.000921937	0.0010013	0.000921596		C18:3 w6	0.0114419	0.0045799	0.00375924	0.00108008		0.00425789	0.000855238	0.000719103	0.000223972		0.00190419	0.000427619	0.000293573	8.46535e-05
9	GC Data	C18:3 w3		nmol/mg protein	0.0601933	0.0433351	0.0315502	0.0264312	0.0430261		0.00231338	0.0040716	0.00324374	0.00350596		0.00161267	0.00407627	0.00159024	0.00510724	0.00283447	0.00191183		0.0133278	0.00485227	0.00908857	0.00739418	0.0058511	0.00555135	0.00590812		C18:3 w3	0.0409072	0.00328367	0.00285546	0.00742477		0.0130331	0.000733326	0.00145582	0.00295857		0.00582858	0.000366663	0.000594337	0.00111823
10	GC Data	C20:0		nmol/mg protein	0.00507295	0.0027247	0.00289095	0.00241199	0.00323164		0.00910535	0.0104026	0.00935723	0.00893878		0.0061504	0.00748166	0.00605501	0.0130955	0.0119346	0.00698572		0.0135534	0.00441651	0.011177	0.0124233	0.00645617	0.00629528	0.0103594		C20:0	0.00326645	0.009451	0.00861715	0.00924016		0.00105229	0.000657334	0.00308744	0.00349837		0.000470599	0.000328667	0.00126044	0.00132226
11	GC Data	C20:2 w6		nmol/mg protein	0.00408824	0.00297485	0.00239998	0.00294038	0.00330457		0.00391914	0.00346035	0.00391786	0.00258499		0.00377042	0.0149027	0.00392876	0.018094	0.00525372	0.00340288		0.0030105	0.00120614	0.0188899	0.00215643	0.00135938	0.00263451	0.00203406		C20:2 w6	0.0031416	0.00347059	0.00822542	0.00447013		0.00062068	0.000628659	0.00651723	0.00639072		0.000277576	0.000314329	0.00266065	0.00241547
12	GC Data	C20:1 w9		nmol/mg protein	0.0135411	0.00859342	0.00652443	0.00672341	0.0118464		0.0846159	0.052725	0.0749294	0.0429189		0.0820601	0.100436	0.0756984	0.0889566	0.110591	0.0677681		0.05537	0.0170636	0.0532539	0.0435625	0.0181378	0.0177511	0.0354377		C20:1 w9	0.00944574	0.0637973	0.0875851	0.0343681		0.00313076	0.0192859	0.0158798	0.0169432		0.00140012	0.00964296	0.00648289	0.00640393
13	GC Data	C20:3 w6		nmol/mg protein	0.0087196	0.00730071	0.00666142	0.00681758	0.00660338		0.0156999	0.0133708	0.0140348	0.0144139		0.0157358	0.0238967	0.0110244	0.0227396	0.0169211	0.011691		0.0138964	0.00710291	0.0126611	0.0092008	0.00743202	0.00659927	0.00917293		C20:3 w6	0.00722054	0.0143799	0.0170014	0.00943792		0.000881686	0.00097995	0.0054038	0.00282629		0.000394302	0.000489975	0.00220609	0.00106824
14	GC Data	C20:4 w6		nmol/mg protein	0.0796766	0.0733145	0.0582671	0.06483	0.0771826		0.0821072	0.0636705	0.0810968	0.081569		0.0786828	0.0908917	0.0654397	0.0773441	0.0861087	0.069664		0.0368992	0.0288438	0.033266	0.023165	0.0258566	0.0242299	0.026802		C20:4 w6	0.0706542	0.0771109	0.0780218	0.0284375		0.00892277	0.00896976	0.0095926	0.00499864		0.00399038	0.00448488	0.00391616	0.00188931
15	GC Data	C20:5 w3		nmol/mg protein	0.0197393	0.0165738	0.012906	0.0126335	0.0145047		0.00135028	0.00158064	0.00136916	0.00136414		0.000599541	0.000532861	0.000316966	0.000633375	0.000622742	0.000973846		0.0670776	0.0362846	0.0354271	0.039899	0.0396114	0.0362673	0.036881		C20:5 w3	0.0152714	0.00141606	0.000613222	0.0416354		0.00294958	0.000110015	0.000212113	0.0113505		0.00131909	5.50073e-05	8.65947e-05	0.0042901
16	GC Data	C22:5 w3		nmol/mg protein	0.0120156	0.0108032	0.00899873	0.00871924	0.00954997		0.00277278	0.00358834	0.00300295	0.00356971		0.00295335	0.00287203	0.00222816	0.00308727	0.00344577	0.00233418		0.0434632	0.0160673	0.0238568	0.0271216	0.0190472	0.0173912	0.0240237		C22:5 w3	0.0100173	0.00323345	0.00282013	0.0244244		0.001374	0.000410026	0.000462558	0.00929565		0.000614472	0.000205013	0.000188838	0.00351343
17	GC Data	C22:6 w3		nmol/mg protein	0.0828194	0.0785936	0.0574638	0.067582	0.0704089		0.0290575	0.0246449	0.029887	0.029948		0.0270084	0.0266867	0.0212597	0.0247689	0.0309062	0.0252896		0.418507	0.186403	0.210316	0.231093	0.212272	0.191136	0.200596		C22:6 w3	0.0713735	0.0283843	0.0259866	0.23576		0.00989854	0.00252586	0.00316381	0.0819362		0.00442676	0.00126293	0.00129162	0.030969
1	UHPLC/MS/MS Data	PA 23:2 (2:0/21:2)		Peak Area/mg protein	186388	270097	118029	887.299	66347.7		304441	1241.03	1173.15	1204.48		83769.4	110337	98338.8	130655	167461	116805		156129	87244.7	103928	2410.14	3247.86	2851.41	206.897		PA 23:2 (2:0/21:2)	128350	77015	117894	50859.7		104473	151618	29068.7	64169.6		46721.6	75808.8	11867.3	24253.8
2	UHPLC/MS/MS Data	PA 25:1 (3:0/22:1)		Peak Area/mg protein	191737	191028	74699.4	236.136	58750.2		250963	164.103	222.665	35.014		69272.4	60507.1	64615.9	73767.9	74651.5	1033.95		88829.3	61130.3	78071.6	43194.1	1253.56	62113.5	89.6552		PA 25:1 (3:0/22:1)	103290	62846.2	57308.1	47811.7		85062	125411	28090.1	35228.8		38040.9	62705.6	11467.8	13315.2
3	UHPLC/MS/MS Data	PA 32:0 (16:0/16:0)		Peak Area/mg protein	81727.8	92571.9	76053.7	93200.2	74098.7		134364	145620	84143.6	77678.5		107686	117614	118598	100258	113586	139145		171421	141913	94773.4	114094	119367	102406	107037		PA 32:0 (16:0/16:0)	83530.5	110452	116148	121573		8991.1	34519.6	13173.3	26634.2		4020.94	17259.8	5377.97	10066.8
4	UHPLC/MS/MS Data	PA 34:1 (16:0/18:1)		Peak Area/mg protein	273465	283600	150753	93436.4	132849		385327	145784	84366.3	77713.6		176958	178121	183214	174026	188238	140179		260251	203044	172845	157288	120620	164520	107127		PA 34:1 (16:0/18:1)	186821	173298	173456	169385		86324.8	144636	17061.2	51357.5		38605.6	72317.9	6965.2	19411.3
5	UHPLC/MS/MS Data	PA 34:2 (16:0/18:2)		Peak Area/mg protein	312199	409896	268830	282613	241867		130615	243745	103850	147865		106858	152790	170305	125170	145327	163411		161698	186852	170361	147354	213840	212350	281513		PA 34:2 (16:0/18:2)	303081	156519	143977	196281		64868.8	60905.1	24007.8	45058.4		29010.2	30452.6	9801.15	17030.5
6	UHPLC/MS/MS Data	PA 34:2 (16:1/18:1)		Peak Area/mg protein	438414	627411	591875	787647	595915		1498.91	558619	320572	434707		327129	435428	468818	271193	459322	677774		394802	480599	299172	429443	589488	551676	407950		PA 34:2 (16:1/18:1)	608253	328849	439944	450447		124313	238905	140710	98924.7		55594.4	119453	57444.7	37390
7	UHPLC/MS/MS Data	PA 34:3 (16:1/18:2)		Peak Area/mg protein	314726	358721	411640	313620	161687		2087.15	201807	110760	273451		1135.78	1769.08	117139	87628.8	116549	151871		156913	261875	147004	118777	146893	287074	271632		PA 34:3 (16:1/18:2)	312079	147026	79348.7	198595		93160	117341	63680.1	71426.5		41662.4	58670.4	25997.3	26996.7
8	UHPLC/MS/MS Data	PA 36:1 (18:0/18:1)		Peak Area/mg protein	429592	712843	459097	782766	387633		435044	1.33678e+06	780745	1.01473e+06		986107	2.07213e+06	2.66692e+06	926230	1.93799e+06	3.50997e+06		1.96421e+06	1.80909e+06	986370	1.87519e+06	1.63331e+06	1.76252e+06	2.17287e+06		PA 36:1 (18:0/18:1)	554386	891823	2.01656e+06	1.74336e+06		180087	380384	991276	374269		80537.5	190192	404687	141460
9	UHPLC/MS/MS Data	PA 36:2 (18:1/18:1)		Peak Area/mg protein	8573.57	13843.7	5721.02	9259.39	4142.42		768198	771497	407818	484352		585994	1.00127e+06	591075	609691	800530	1.10598e+06		567847	497241	410536	507125	634374	600619	665160		PA 36:2 (18:1/18:1)	8308.02	607966	782422	554700		3730.42	189523	227131	88674.4		1668.29	94761.3	92725.9	33515.8
10	UHPLC/MS/MS Data	PA 38:2 (14:1/24:1)		Peak Area/mg protein	8738.74	12751.2	7422.51	13141.3	4630.3		537412	781802	476872	447971		511477	598680	537635	605272	925659	1.08817e+06		1.17191e+06	656010	520592	877174	931307	944967	922570		PA 38:2 (14:1/24:1)	9336.81	561014	711150	860647		3616.14	151837	237486	212370		1617.19	75918.3	96953.2	80268.5
11	UHPLC/MS/MS Data	PA 36:3 (18:1/18:2)		Peak Area/mg protein	438165	726686	464818	792025	391776		1.20324e+06	2.10827e+06	1.18856e+06	1.49908e+06		1.5721e+06	3.0734e+06	3.25799e+06	1.53592e+06	2.73852e+06	4.61594e+06		2.53205e+06	2.30633e+06	1.39691e+06	2.38231e+06	2.26768e+06	2.36313e+06	2.83803e+06		PA 36:3 (18:1/18:2)	562694	1.49979e+06	2.79898e+06	2.29806e+06		182884	430138	1.15685e+06	441725		81788.3	215069	472284	166956
12	UHPLC/MS/MS Data	PA 36:4 (16:0/20:4)		Peak Area/mg protein	446739	740530	470539	801285	395918		1.97144e+06	2.87977e+06	1.59638e+06	1.98343e+06		2.15809e+06	4.07466e+06	3.84907e+06	2.14561e+06	3.53905e+06	5.72192e+06		3.0999e+06	2.80357e+06	1.80744e+06	2.88944e+06	2.90205e+06	2.96375e+06	3.50319e+06		PA 36:4 (16:0/20:4)	571002	2.10776e+06	3.5814e+06	2.85276e+06		185714	545146	1.34059e+06	515645		83053.7	272573	547292	194896
13	UHPLC/MS/MS Data	PA 36:4 (18:2/18:2)		Peak Area/mg protein	884904	1.46722e+06	935358	1.59331e+06	787694		3.17468e+06	4.98805e+06	2.78494e+06	3.48251e+06		3.7302e+06	7.14806e+06	7.10706e+06	3.68153e+06	6.27757e+06	1.03379e+07		5.63195e+06	5.10991e+06	3.20435e+06	5.27175e+06	5.16973e+06	5.32689e+06	6.34122e+06		PA 36:4 (18:2/18:2)	1.1337e+06	3.60755e+06	6.38038e+06	5.15083e+06		368590	963580	2.49387e+06	956116		164838	481790	1.01812e+06	361378
14	UHPLC/MS/MS Data	PA 38:4 (18:0/20:4)		Peak Area/mg protein	4.37889e+06	6.30841e+06	5.67092e+06	3.69455e+06	3.52544e+06		3.54815e+06	9.01964e+06	5.15692e+06	6.86619e+06		6.1267e+06	1.10005e+07	9.49218e+06	5.83515e+06	9.8695e+06	1.40383e+07		2.78876e+06	5.1163e+06	3.13715e+06	3.01014e+06	4.28369e+06	4.25579e+06	4.15434e+06		PA 38:4 (18:0/20:4)	4.71564e+06	6.14773e+06	9.39374e+06	3.82088e+06		1.22699e+06	2.34546e+06	3.08957e+06	854663		548728	1.17273e+06	1.26131e+06	323032
15	UHPLC/MS/MS Data	PA 38:5 (18:0/20:5)		Peak Area/mg protein	274869	356167	307085	287335	182437		9821.35	27528.2	1.16862e+06	1.4554e+06		18993.7	2.294e+06	1.94608e+06	20862	28086.9	43834.9		1.40353e+06	2.90037e+06	1.41215e+06	1.58655e+06	2.42838e+06	2.01364e+06	2.18371e+06		PA 38:5 (18:0/20:5)	281579	665343	725309	1.98976e+06		63484.6	755865	1.08598e+06	562682		28391.2	377932	443348	212674
16	UHPLC/MS/MS Data	PA 38:6 (16:0/22:6)		Peak Area/mg protein	1.15434e+06	1.67096e+06	1.48144e+06	1.26029e+06	855118		422443	932625	615437	1.00788e+06		596486	968580	936670	667414	958470	1.26929e+06		1.85927e+06	3.21901e+06	1.78552e+06	2.06597e+06	3.06865e+06	3.62605e+06	3.35736e+06		PA 38:6 (16:0/22:6)	1.28443e+06	744597	899485	2.71169e+06		312262	273946	241685	778793		139648	136973	98667.6	294356
17	UHPLC/MS/MS Data	PA 40:6 (18:0/22:6)		Peak Area/mg protein	5.16986e+06	6.88819e+06	4.83902e+06	4.85494e+06	3.62334e+06		978342	2.5776e+06	1.97338e+06	3.17022e+06		1.75762e+06	3.48703e+06	3.07266e+06	2.04055e+06	2.88895e+06	4.09731e+06		7.57387e+06	7.5646e+06	5.34791e+06	6.65972e+06	8.91234e+06	9.46388e+06	1.02195e+07		PA 40:6 (18:0/22:6)	5.07507e+06	2.17488e+06	2.89069e+06	7.96312e+06		1.17346e+06	935448	877640	1.68786e+06		524789	467724	358295	637951
1	UHPLC/MS/MS Data	PC 32:0 (16:0/16:0)		Peak Area/mg protein	3.94123e+07	5.59396e+07	5.40873e+07	51160322	3.8149e+07		5.06611e+07	1.50204e+08	86062446	6.54083e+07		7.38489e+07	1.24195e+08	1.36385e+08	7.08287e+07	1.65821e+08	1.78218e+08		9.46713e+07	8.54113e+07	5.0524e+07	1.23347e+08	9.70477e+07	9.47017e+07	111806069		PC 32:0 (16:0/16:0)	4.77497e+07	8.8084e+07	1.24883e+08	9.39299e+07		8.37494e+06	4.38848e+07	4.51213e+07	2.29217e+07		3.74539e+06	2.19424e+07	1.84207e+07	8.6636e+06
2	UHPLC/MS/MS Data	PC 32:1 (16:0/16:1)		Peak Area/mg protein	2.86385e+07	3.93654e+07	3.467e+07	2.42365e+07	2.32642e+07		6.08368e+07	1.37665e+08	7.72396e+07	9.97227e+07		6.29195e+07	9.62077e+07	1.03235e+08	7.38239e+07	8.42841e+07	1.0616e+08		1.02274e+08	1.02393e+08	7.81758e+07	9.7767e+07	1.24719e+08	1.25282e+08	1.13444e+08		PC 32:1 (16:0/16:1)	3.00349e+07	9.3866e+07	8.77717e+07	1.06293e+08		6.89122e+06	3.32667e+07	1.71624e+07	1.65623e+07		3.08185e+06	1.66334e+07	7.00651e+06	6.25996e+06
3	UHPLC/MS/MS Data	PC 32:2 (16:1/16:1)		Peak Area/mg protein	9.6939e+06	1.23384e+07	1.38333e+07	1.02686e+07	7.23238e+06		7.77385e+06	2.5706e+07	1.48779e+07	2.56271e+07		9.47141e+06	2.02491e+07	2.12614e+07	1.65803e+07	2.06727e+07	2.98349e+07		1.48763e+07	1.74643e+07	1.20535e+07	1.75244e+07	3.02863e+07	3.2389e+07	3.19855e+07		PC 32:2 (16:1/16:1)	1.06733e+07	1.84962e+07	1.96783e+07	2.23685e+07		2.5358e+06	8.7729e+06	6.64463e+06	8.80944e+06		1.13404e+06	4.38645e+06	2.71266e+06	3.32966e+06
4	UHPLC/MS/MS Data	PC 33:1 (16:0/17:1)		Peak Area/mg protein	3.95794e+06	5.49382e+06	4.51888e+06	4.96125e+06	3.80457e+06		1.36057e+07	2.8729e+07	1.75957e+07	2.24671e+07		1.36566e+07	2.24503e+07	2.45389e+07	1.78963e+07	2.05637e+07	2.59352e+07		2.11798e+07	2.39117e+07	1.67185e+07	2.14638e+07	3.06766e+07	3.25991e+07	2.74279e+07		PC 33:1 (16:0/17:1)	4.54729e+06	2.05994e+07	2.08402e+07	2.48539e+07		701260	6.5195e+06	4.52945e+06	5.66541e+06		313613	3.25975e+06	1.84914e+06	2.14132e+06
5	UHPLC/MS/MS Data	PC 33:2 (15:0/18:2)		Peak Area/mg protein	7.71852e+06	9.20473e+06	8.22188e+06	8.44113e+06	5.94665e+06		3.13122e+06	8.37752e+06	4.4836e+06	7.64973e+06		2.9941e+06	5.33151e+06	5.97235e+06	4.95352e+06	5.61969e+06	7.16535e+06		4.97863e+06	7.4838e+06	5.74276e+06	5.3426e+06	9.6783e+06	1.0254e+07	9.46635e+06		PC 33:2 (15:0/18:2)	7.90658e+06	5.91052e+06	5.33942e+06	7.56378e+06		1.21933e+06	2.50809e+06	1.3757e+06	2.24601e+06		545299	1.25404e+06	561626	848913
6	UHPLC/MS/MS Data	PC 34:0; (16:0/18:0)		Peak Area/mg protein	3.04374e+06	4.42104e+06	4.78498e+06	4.71766e+06	3.33325e+06		3.08139e+06	1.41425e+07	1.02658e+07	7.33274e+06		7.37838e+06	1.45286e+07	1.66677e+07	8.80354e+06	3.69314e+07	3.69635e+07		1.11688e+07	9.68988e+06	5.16923e+06	2.60107e+07	1.36076e+07	1.49824e+07	2.55325e+07		PC 34:0; (16:0/18:0)	4.06014e+06	8.70559e+06	2.02122e+07	1.51659e+07		813852	4.67298e+06	1.34154e+07	7.88919e+06		363966	2.33649e+06	5.47682e+06	2.98183e+06
7	UHPLC/MS/MS Data	PC 34:1 (16:0/18:1)		Peak Area/mg protein	1.95061e+08	2.5468e+08	2.31239e+08	2.13341e+08	1.6818e+08		3.42893e+08	4.73111e+08	2.97878e+08	3.30678e+08		339154199	3.97669e+08	4.04951e+08	3.02507e+08	3.6699e+08	3.9294e+08		3.55173e+08	364721147	3.28027e+08	3.29993e+08	3.81218e+08	3.64252e+08	3.65381e+08		PC 34:1 (16:0/18:1)	2.125e+08	3.6114e+08	3.67369e+08	3.55538e+08		3.31637e+07	7.70293e+07	3.99692e+07	1.96898e+07		1.48312e+07	3.85147e+07	1.63174e+07	7.44204e+06
8	UHPLC/MS/MS Data	PC 34:2 (16:0/18:2)		Peak Area/mg protein	3.63055e+08	4.03424e+08	333315566	3.52301e+08	3.04605e+08		2.56547e+08	4.38628e+08	2.54466e+08	3.09315e+08		2.52787e+08	326932681	3.36755e+08	2.57887e+08	280005586	3.23658e+08		3.45508e+08	3.54012e+08	3.20801e+08	3.12546e+08	3.79693e+08	3.72206e+08	3.53605e+08		PC 34:2 (16:0/18:2)	3.5134e+08	3.14739e+08	2.96338e+08	3.48339e+08		3.6606e+07	8.64044e+07	3.73036e+07	2.46984e+07		1.63707e+07	4.32022e+07	1.52291e+07	9.33513e+06
9	UHPLC/MS/MS Data	PC 34:3 (16:1/18:2)		Peak Area/mg protein	8.06499e+07	1.05707e+08	1.08645e+08	8.25982e+07	5.86067e+07		1.86899e+07	5.44956e+07	3.27041e+07	5.56243e+07		2.46441e+07	5.63516e+07	57165000	3.9232e+07	5.83559e+07	7.76115e+07		3.65122e+07	3.8923e+07	3.29651e+07	3.70714e+07	5.77233e+07	5.70194e+07	5.84449e+07		PC 34:3 (16:1/18:2)	8.72414e+07	4.03785e+07	5.22267e+07	4.55228e+07		2.05186e+07	1.78981e+07	1.81825e+07	1.15605e+07		9.1762e+06	8.94903e+06	7.42298e+06	4.36946e+06
10	UHPLC/MS/MS Data	PC 34:4 (14:0/20:4)		Peak Area/mg protein	2.2062e+06	2.75272e+06	3.45015e+06	2.65957e+06	1.57756e+06		3.55256e+06	7.92583e+06	6.29242e+06	9.57439e+06		5.15706e+06	9.9214e+06	9.76623e+06	6.89557e+06	1.126e+07	1.48386e+07		126412	3.01587e+06	1.7229e+06	2.51411e+06	4.01092e+06	4.33469e+06	4.07019e+06		PC 34:4 (14:0/20:4)	2.52924e+06	6.8363e+06	9.63981e+06	2.82787e+06		693730	2.56664e+06	3.38744e+06	1.5202e+06		310246	1.28332e+06	1.38292e+06	574583
11	UHPLC/MS/MS Data	PC 35:1 (9:0/26:1)		Peak Area/mg protein	1.22827e+07	1.64086e+07	1.3936e+07	1.17223e+07	8.50529e+06		2.45765e+07	4.3218e+07	2.5308e+07	3.22379e+07		3.33152e+07	4.0367e+07	4.81941e+07	2.9475e+07	4.22946e+07	5.38095e+07		3.28887e+07	3.7039e+07	3.02883e+07	3.67433e+07	4.74231e+07	4.67419e+07	4.73837e+07		PC 35:1 (9:0/26:1)	1.2571e+07	3.13351e+07	4.12426e+07	3.97869e+07		2.9122e+06	8.64147e+06	9.04922e+06	7.29174e+06		1.30238e+06	4.32073e+06	3.69433e+06	2.75602e+06
12	UHPLC/MS/MS Data	PC 35:2 (13:1/22:1)		Peak Area/mg protein	3.70717e+07	4.83126e+07	3.4582e+07	3.72548e+07	2.96277e+07		1.23302e+07	2.61436e+07	1.28278e+07	2.06549e+07		1.37487e+07	2.10303e+07	2.26082e+07	1.6532e+07	2.11898e+07	2.56407e+07		2.25609e+07	2.74241e+07	2.2691e+07	2.72432e+07	3.50064e+07	3.68669e+07	3.42543e+07		PC 35:2 (13:1/22:1)	3.73698e+07	1.79892e+07	2.0125e+07	2.94352e+07		6.84758e+06	6.63988e+06	4.29207e+06	5.93129e+06		3.06233e+06	3.31994e+06	1.75223e+06	2.24182e+06
13	UHPLC/MS/MS Data	PC 35:2 (17:1/18:1)		Peak Area/mg protein	2.10598e+07	2.5041e+07	2.24709e+07	2.11229e+07	1.45707e+07		1.17117e+07	2.70249e+07	1.78907e+07	2.4775e+07		1.38465e+07	2.51335e+07	2.41924e+07	1.88072e+07	2.40275e+07	2.99801e+07		2.29236e+07	2.58627e+07	1.92416e+07	2.67047e+07	3.48733e+07	3.4654e+07	3.42985e+07		PC 35:2 (17:1/18:1)	2.08531e+07	2.03506e+07	2.26645e+07	2.83655e+07		3.86456e+06	6.94747e+06	5.59361e+06	6.31108e+06		1.72828e+06	3.47374e+06	2.28358e+06	2.38536e+06
14	UHPLC/MS/MS Data	PC 35:4 (15:0/20:4)		Peak Area/mg protein	2.11056e+06	2.87422e+06	2.88531e+06	2.64941e+06	1.739e+06		3.67783e+06	1.03897e+07	7.4367e+06	1.06956e+07		5.39673e+06	1.12457e+07	1.22117e+07	8.5061e+06	1.29556e+07	1.69945e+07		1.48951e+06	2.94046e+06	1.46486e+06	1.97267e+06	2.95933e+06	3.14115e+06	3.00141e+06		PC 35:4 (15:0/20:4)	2.4517e+06	8.04994e+06	1.12184e+07	2.4242e+06		507431	3.2642e+06	3.96528e+06	752545		226930	1.6321e+06	1.61882e+06	284435
15	UHPLC/MS/MS Data	PC 36:1 (18:0/18:1)		Peak Area/mg protein	1.88386e+07	2.59598e+07	3.17239e+07	2.27033e+07	1.43248e+07		3.86289e+07	7.71529e+07	5.8022e+07	7.69261e+07		7.34875e+07	143713229	1.20361e+08	6.8913e+07	1.74234e+08	1.88281e+08		1.11035e+08	9.04443e+07	6.94861e+07	1.37489e+08	134291916	1.4413e+08	1.53162e+08		PC 36:1 (18:0/18:1)	2.27101e+07	6.26825e+07	1.28165e+08	1.20005e+08		6.65416e+06	1.83718e+07	5.00787e+07	3.08157e+07		2.97583e+06	9.18591e+06	2.04445e+07	1.16472e+07
16	UHPLC/MS/MS Data	PC 36:2 (18:0/18:2)		Peak Area/mg protein	294058033	3.21984e+08	2.92002e+08	2.75601e+08	2.18911e+08		4.93743e+07	2.61316e+08	1.76042e+08	2.23113e+08		1.87514e+08	3.23224e+08	2.77262e+08	1.94694e+08	2.74744e+08	3.01715e+08		2.54908e+08	2.55624e+08	2.18032e+08	275307991	3.1274e+08	3.04544e+08	3.19819e+08		PC 36:2 (18:0/18:2)	2.80511e+08	1.77461e+08	2.59859e+08	2.77282e+08		3.82564e+07	9.22387e+07	5.61636e+07	3.71798e+07		1.71088e+07	4.61194e+07	2.29287e+07	1.40526e+07
17	UHPLC/MS/MS Data	PC 36:3 (16:0/20:3)		Peak Area/mg protein	2.20964e+06	2.61213e+06	9.43473e+07	2.13496e+06	786036		1.02518e+08	3.00971e+08	2.15944e+08	2.75017e+08		1.31379e+08	1.80759e+08	1.93858e+08	1.47772e+08	1.88512e+08	2.01639e+08		1.26889e+08	1.54306e+08	1.23306e+08	1.63371e+08	1.87065e+08	2.55152e+08	1.89389e+08		PC 36:3 (16:0/20:3)	2.0418e+07	2.23613e+08	1.73987e+08	1.71354e+08		4.13334e+07	8.82223e+07	2.79965e+07	4.51559e+07		1.84849e+07	4.41111e+07	1.14295e+07	1.70673e+07
18	UHPLC/MS/MS Data	PC 36:3 (18:1/18:2)		Peak Area/mg protein	2.14847e+08	1.67593e+08	1.46642e+08	2.14585e+08	1.48314e+08		5.52241e+07	765308	1.90233e+06	1.74639e+06		7.25268e+07	1.36464e+08	1.02425e+08	7.32813e+07	8.34963e+07	1.04275e+08		8.49633e+07	6.82935e+07	7.69833e+07	7.89536e+07	8.89815e+07	3.11184e+06	1.01913e+08		PC 36:3 (18:1/18:2)	1.78396e+08	1.49095e+07	9.54115e+07	7.18858e+07		3.41622e+07	2.68811e+07	2.4366e+07	3.2103e+07		1.52778e+07	1.34405e+07	9.94737e+06	1.21338e+07
19	UHPLC/MS/MS Data	PC 36:4 (16:0/20:4)		Peak Area/mg protein	249346	386971	312480	280951	221233		6069.72	897288	693692	16173		567078	1.66819e+06	1.57108e+06	624777	860336	1.05614e+06		182272	161983	2130.98	127836	186609	202930	177839		PC 36:4 (16:0/20:4)	290196	403306	1.05793e+06	148800		63976.8	460439	469755	68857.8		28611.3	230219	191777	26025.8
20	UHPLC/MS/MS Data	PC 36:5 (16:0/20:5)		Peak Area/mg protein	2.23947e+07	3.34834e+07	4.00751e+07	3.55009e+07	1.52334e+07		3.4328e+06	706810	410173	1.8101e+07		412368	633295	687913	518808	862862	1.11277e+06		2.33843e+08	254367276	174146742	2.32606e+08	2.79215e+08	2.76629e+08	2.90583e+08		PC 36:5 (16:0/20:5)	2.93375e+07	5.66268e+06	704670	2.4877e+08		1.02176e+07	8.40302e+06	251767	3.98651e+07		4.56946e+06	4.20151e+06	102784	1.50676e+07
21	UHPLC/MS/MS Data	PC 36:6 (14:0/22:6)		Peak Area/mg protein	1.74967e+06	2.31424e+06	3.2086e+06	2.34895e+06	1.3038e+06		974076	2.8761e+06	2.67926e+06	4.5043e+06		2.16119e+06	5.96308e+06	5.43642e+06	3.16903e+06	6.59472e+06	8.7166e+06		7.90768e+06	1.29183e+07	5.98596e+06	1.07894e+07	1.92837e+07	2.01748e+07	2.22443e+07		PC 36:6 (14:0/22:6)	2.18505e+06	2.75843e+06	5.34018e+06	1.41863e+07		717176	1.44362e+06	2.3745e+06	6.4108e+06		320731	721808	969385	2.42305e+06
22	UHPLC/MS/MS Data	PC 37:1 (11:0/26:1)		Peak Area/mg protein	2.72257e+06	3.37638e+06	3.36393e+06	2.86103e+06	2.1624e+06		6.19439e+06	1.03325e+07	5.50661e+06	7.57787e+06		8.0645e+06	11970818	1.01549e+07	7.27778e+06	1.15175e+07	1.34037e+07		8.6354e+06	8.45483e+06	7.50214e+06	1.03161e+07	9.97276e+06	1.14966e+07	1.28531e+07		PC 37:1 (11:0/26:1)	2.89726e+06	7.40284e+06	1.03982e+07	9.89012e+06		504773	2.1346e+06	2.3665e+06	1.86569e+06		225741	1.0673e+06	966120	705166
23	UHPLC/MS/MS Data	PC 37:4 (15:1/22:3)		Peak Area/mg protein	1.32945e+07	1.7128e+07	1.51512e+07	1.23271e+07	8.81416e+06		1.74355e+07	2.76962e+07	1.88825e+07	2.44092e+07		2.12729e+07	2.8991e+07	2.65085e+07	2.26359e+07	34824341	3.37969e+07		5.27218e+06	7.90759e+06	5.18562e+06	6.6466e+06	7.446e+06	8.29584e+06	8.46671e+06		PC 37:4 (15:1/22:3)	1.3343e+07	2.21059e+07	2.80049e+07	7.03151e+06		3.1281e+06	4.78749e+06	5.61087e+06	1.36921e+06		1.39893e+06	2.39375e+06	2.29063e+06	517511
24	UHPLC/MS/MS Data	PC 37:4 (17:0/20:4)		Peak Area/mg protein	1.16936e+07	1.43267e+07	1.42617e+07	1.33614e+07	8.99841e+06		8.35017e+06	1.65776e+07	1.19693e+07	1.68662e+07		1.02211e+07	1.66576e+07	1.74437e+07	1.4931e+07	2.15137e+07	2.26132e+07		4.16521e+06	6.08796e+06	3.50745e+06	5.07099e+06	6.00824e+06	6.45071e+06	5.90562e+06		PC 37:4 (17:0/20:4)	1.25284e+07	1.34408e+07	1.723e+07	5.31374e+06		2.2411e+06	4.06828e+06	4.51912e+06	1.10796e+06		1.00225e+06	2.03414e+06	1.84492e+06	418771
25	UHPLC/MS/MS Data	PC 37:5 (13:1/24:4)		Peak Area/mg protein	49628.4	63959.3	908683	1.69035e+06	726932		8326.8	22102.6	448624	1.02603e+06		9178.69	7240.7	8234.13	794754	8893.76	1.38619e+06		1.10058e+07	1.4091e+07	7.20048e+06	1.19326e+07	1.45991e+07	1.53405e+07	1.74017e+07		PC 37:5 (13:1/24:4)	687910	376270	369082	1.30816e+07		680416	478969	589256	3.34926e+06		304291	239485	240563	1.2659e+06
26	UHPLC/MS/MS Data	PC 37:6 (15:0/22:6)		Peak Area/mg protein	2.46492e+06	3.17813e+06	3.60544e+06	3.98593e+06	1.94839e+06		2.14832e+06	6.33405e+06	4.66167e+06	7.32306e+06		3.08356e+06	7.38942e+06	7.12447e+06	5.35094e+06	9.15889e+06	1.10052e+07		9.51916e+06	1.56391e+07	8.35969e+06	1.0844e+07	1.80858e+07	2.14007e+07	2.09955e+07		PC 37:6 (15:0/22:6)	3.03657e+06	5.11677e+06	7.18541e+06	1.49777e+07		830038	2.26335e+06	2.78285e+06	5.45049e+06		371204	1.13168e+06	1.13609e+06	2.06009e+06
27	UHPLC/MS/MS Data	PC 38:3 (18:0/20:3)		Peak Area/mg protein	2.97128e+07	3.34884e+07	4.94408e+07	3.11643e+07	1.59898e+07		2.22364e+07	4.63851e+07	3.29895e+07	5.09928e+07		4.38812e+07	7.25626e+07	5.77643e+07	4.13827e+07	1.01581e+08	9.16951e+07		3.36139e+07	3.91857e+07	3.17412e+07	5.47609e+07	5.10545e+07	4.96068e+07	6.92857e+07		PC 38:3 (18:0/20:3)	3.19592e+07	3.81509e+07	6.81444e+07	4.70355e+07		1.19231e+07	1.30719e+07	2.4919e+07	1.32488e+07		5.33219e+06	6.53597e+06	1.01732e+07	5.00759e+06
28	UHPLC/MS/MS Data	PC 38:4 (18:0/20:4)		Peak Area/mg protein	1.79716e+08	1.96166e+08	2.12374e+08	1.81494e+08	1.37382e+08		1.3683e+08	2.03169e+08	1.54741e+08	1.70487e+08		1.59984e+08	200983953	1.89888e+08	1.6799e+08	2.34981e+08	2.2091e+08		4.53546e+07	6.53103e+07	4.22938e+07	5.06113e+07	5.66374e+07	6.2536e+07	5.89223e+07		PC 38:4 (18:0/20:4)	1.81426e+08	1.66307e+08	1.95789e+08	5.45237e+07		2.79189e+07	2.81598e+07	2.927e+07	8.69207e+06		1.24857e+07	1.40799e+07	1.19494e+07	3.28529e+06
29	UHPLC/MS/MS Data	PC 38:4 (18:1/20:3)		Peak Area/mg protein	1.68019e+07	2.07687e+07	2.38038e+07	2.00631e+07	6.75824e+06		4.12644e+07	7.09345e+07	6.09104e+07	7.38257e+07		6.64354e+07	1.03425e+08	8.76922e+07	6.17037e+07	9.8887e+07	1.01829e+08		3.04334e+07	2.85497e+07	2.6991e+07	3.68387e+07	3.81699e+07	3.1437e+07	3.97696e+07		PC 38:4 (18:1/20:3)	1.76391e+07	6.17337e+07	8.6662e+07	3.31699e+07		6.57206e+06	1.47257e+07	1.84041e+07	5.03375e+06		2.93911e+06	7.36285e+06	7.51346e+06	1.90258e+06
30	UHPLC/MS/MS Data	PC 38:5 (18:0/20:5)		Peak Area/mg protein	1.44235e+07	429956	1.99343e+07	1.95994e+07	1.03669e+07		577935	877728	833559	748431		2.67091e+07	4.28182e+07	4.75954e+07	3.63481e+07	4.69067e+07	4.86364e+07		6.88296e+07	8.24454e+07	4.29602e+07	7.9184e+07	9.82939e+07	1.04991e+08	113478069		PC 38:5 (18:0/20:5)	1.29508e+07	759413	4.15023e+07	8.43118e+07		8.04037e+06	132352	8.53656e+06	2.39904e+07		3.59576e+06	66176	3.48503e+06	9.06753e+06
31	UHPLC/MS/MS Data	PC 38:6 (16:0/22:6)		Peak Area/mg protein	2.86179e+08	3.0988e+08	2.84129e+08	2.95503e+08	233468303		1.90306e+08	2.84596e+08	2.12505e+08	2.45385e+08		2.12803e+08	2.66936e+08	2.71038e+08	2.18301e+08	2.81688e+08	2.98821e+08		2.92978e+08	3.29351e+08	2.74473e+08	2.80338e+08	3.33186e+08	3.32481e+08	3.28549e+08		PC 38:6 (16:0/22:6)	2.81832e+08	2.33198e+08	2.58264e+08	3.10194e+08		2.88824e+07	4.10618e+07	3.49162e+07	2.64354e+07		1.29166e+07	2.05309e+07	1.42545e+07	9.99166e+06
32	UHPLC/MS/MS Data	PC 38:7 (16:1/22:6)		Peak Area/mg protein	2.05917e+07	2.62737e+07	3.27059e+07	2.43391e+07	1.35792e+07		1.14559e+07	3.12592e+07	2.45927e+07	4.84374e+07		2.03021e+07	4.36233e+07	4.09607e+07	2.86238e+07	5.28641e+07	8.07603e+07		6.68818e+07	8.21874e+07	4.80395e+07	7.77122e+07	1.20242e+08	1.30234e+08	1.52028e+08		PC 38:7 (16:1/22:6)	2.34979e+07	2.89363e+07	4.45224e+07	9.67606e+07		7.07156e+06	1.53853e+07	2.11455e+07	3.77889e+07		3.1625e+06	7.69263e+06	8.63261e+06	1.42829e+07
33	UHPLC/MS/MS Data	PC 39:4 (19:0/20:4)		Peak Area/mg protein	689845	1.06323e+06	1.24432e+06	798096	451846		4.62323e+06	1.10881e+07	1.01602e+07	1.39729e+07		6.16662e+06	1.00559e+07	9.97044e+06	1.08537e+07	1.24924e+07	1.06448e+07		1.21517e+06	1.18427e+06	839445	1.46996e+06	1.6739e+06	1.84577e+06	2.03192e+06		PC 39:4 (19:0/20:4)	849468	9.9611e+06	1.00307e+07	1.46578e+06		311379	3.9114e+06	2.1e+06	416852		139253	1.9557e+06	857321	157555
34	UHPLC/MS/MS Data	PC 39:6 (17:1/22:5)		Peak Area/mg protein	2.8064e+07	3.1554e+07	2.78508e+07	2.5222e+07	1.81699e+07		1.79943e+07	2.87214e+07	1.69536e+07	2.52082e+07		2.01512e+07	2.62885e+07	2.75085e+07	2.03264e+07	3.32312e+07	3.56449e+07		4.03498e+07	4.12465e+07	3.31076e+07	3.55151e+07	4.60473e+07	4.57885e+07	4.68227e+07		PC 39:6 (17:1/22:5)	2.61721e+07	2.22194e+07	2.71918e+07	4.12682e+07		5.00749e+06	5.68003e+06	6.41168e+06	5.39542e+06		2.23942e+06	2.84001e+06	2.61756e+06	2.03928e+06
35	UHPLC/MS/MS Data	PC 40:6 (18:0/22:6)		Peak Area/mg protein	1.28549e+08	1.39899e+08	1.64548e+08	1.39767e+08	9.32012e+07		3.84222e+07	83688000	5.23436e+07	7.34421e+07		5.80313e+07	8.53462e+07	7.15112e+07	6.43015e+07	1.20886e+08	1.17539e+08		1.65536e+08	1.97741e+08	1.37665e+08	1.74792e+08	2.02426e+08	2.2584e+08	217647931		PC 40:6 (18:0/22:6)	1.33193e+08	6.1974e+07	8.62692e+07	1.88807e+08		2.59433e+07	2.04161e+07	2.71099e+07	3.11502e+07		1.16022e+07	1.0208e+07	1.10676e+07	1.17737e+07
36	UHPLC/MS/MS Data	PC 40:7 (18:1/22:6)		Peak Area/mg protein	9.31798e+07	1.03832e+08	1.11592e+08	1.06439e+08	5.94231e+07		6.39921e+07	9.89352e+07	9.08878e+07	1.04141e+08		1.01059e+08	1.41053e+08	1.24384e+08	9.95399e+07	138626360	1.38094e+08		1.3808e+08	1.3496e+08	1.17326e+08	137027439	1.54991e+08	1.54297e+08	161507931		PC 40:7 (18:1/22:6)	9.48931e+07	8.94891e+07	1.23793e+08	1.42599e+08		2.09351e+07	1.78509e+07	1.91198e+07	1.52562e+07		9.36246e+06	8.92547e+06	7.80562e+06	5.76632e+06
37	UHPLC/MS/MS Data	PC 40:8 (20:4/20:4)		Peak Area/mg protein	2.01246e+07	2.27622e+07	3.15985e+07	2.83332e+07	1.12578e+07		8.54831e+06	1.70755e+07	1.68662e+07	2.55214e+07		1.65317e+07	3.13349e+07	2.52222e+07	1.92746e+07	3.34873e+07	3.58808e+07		2.38302e+07	2.97057e+07	1.73092e+07	2.87421e+07	3.79615e+07	4.30427e+07	4.81026e+07		PC 40:8 (20:4/20:4)	2.28153e+07	1.70028e+07	2.69552e+07	3.26706e+07		7.8805e+06	6.92984e+06	7.90141e+06	1.0894e+07		3.52427e+06	3.46492e+06	3.22574e+06	4.11754e+06
1	UHPLC/MS/MS Data	PE 34:0 (16:0/18:0)		Peak Area/mg protein	4.30822e+06	5.25253e+06	4.5899e+06	4.94214e+06	3.65344e+06		5.54949e+06	8.78782e+06	5.29258e+06	5.91117e+06		6.58203e+06	1.08764e+07	9.58274e+06	5.60101e+06	9.14709e+06	1.16511e+07		8.83881e+06	8.56543e+06	5.05058e+06	7.44114e+06	9.95479e+06	9.61627e+06	8.09571e+06		PE 34:0 (16:0/18:0)	4.54924e+06	6.38526e+06	8.90673e+06	8.22325e+06		614652	1.62168e+06	2.3773e+06	1.63954e+06		274881	810838	970530	619688
2	UHPLC/MS/MS Data	PE 34:1 (16:0/18:1)		Peak Area/mg protein	1.42635e+07	1.65623e+07	1.48396e+07	1.45775e+07	8.98964e+06		1.82727e+07	3.10681e+07	1.43977e+07	2.04391e+07		2.11181e+07	2.88267e+07	2.95969e+07	2.06505e+07	3.14535e+07	4.12632e+07		2.20564e+07	2.47397e+07	1.97784e+07	2.44178e+07	3.32402e+07	3.22913e+07	3.19196e+07		PE 34:1 (16:0/18:1)	1.38465e+07	2.10444e+07	2.88181e+07	2.69205e+07		2.85741e+06	7.13448e+06	7.59515e+06	5.46905e+06		1.27787e+06	3.56724e+06	3.10071e+06	2.06711e+06
3	UHPLC/MS/MS Data	PE 34:2 (16:0/18:2)		Peak Area/mg protein	7.43801e+07	8.97329e+07	6.56052e+07	6.09264e+07	4.70188e+07		1.84771e+07	3.74707e+07	1.55111e+07	2.61975e+07		1.52294e+07	2.142e+07	2.3148e+07	1.93793e+07	2.22606e+07	3.15582e+07		2.82639e+07	4.58019e+07	3.6596e+07	3.45566e+07	5.32583e+07	5.48507e+07	5.062e+07		PE 34:2 (16:0/18:2)	6.75327e+07	2.44141e+07	2.21659e+07	4.3421e+07		1.58738e+07	9.8008e+06	5.39677e+06	1.03263e+07		7.09899e+06	4.9004e+06	2.20322e+06	3.90299e+06
4	UHPLC/MS/MS Data	PE 34:3 (16:0/18:3)		Peak Area/mg protein	4.05398e+06	4.79317e+06	3.10171e+06	2.75115e+06	4.72326e+06		2.69077e+06	8.48746e+06	2.62753e+06	4.67614e+06		2.3864e+06	2.84901e+06	4.17121e+06	3.79156e+06	3.42839e+06	5.32294e+06		1.79057e+06	2.84499e+06	2.22584e+06	1.80024e+06	3.0653e+06	3.09342e+06	2.43392e+06		PE 34:3 (16:0/18:3)	3.88466e+06	4.62048e+06	3.65825e+06	2.4649e+06		929403	2.74786e+06	1.03705e+06	555965		415642	1.37393e+06	423376	210135
5	UHPLC/MS/MS Data	PE 34:3 (16:1/18:2)		Peak Area/mg protein	1.00298e+07	1.0341e+07	2.9208e+06	4.58558e+06	3.85464e+06		1.73103e+06	3.08433e+06	1.2779e+06	2.33168e+06		1.00167e+06	1.4517e+06	1.64956e+06	1.95853e+06	1.7318e+06	2.43383e+06		1.14146e+06	1.44625e+06	1.3309e+06	1.41232e+06	2.14238e+06	2.01861e+06	1.96448e+06		PE 34:3 (16:1/18:2)	6.34636e+06	2.10624e+06	1.70452e+06	1.63663e+06		3.55557e+06	781963	481268	394631		1.5901e+06	390982	196477	149157
6	UHPLC/MS/MS Data	PE 36:1 (18:0/18:1)		Peak Area/mg protein	1.49723e+07	2.26428e+07	1.90077e+07	1.66763e+07	1.32242e+07		3.73692e+07	6.55061e+07	3.76979e+07	4.95506e+07		5.06778e+07	8.43119e+07	6.90521e+07	4.5859e+07	7.10162e+07	8.90224e+07		5.0467e+07	5.66735e+07	4.41157e+07	5.04542e+07	7.07873e+07	6.66129e+07	6.81699e+07		PE 36:1 (18:0/18:1)	1.73046e+07	4.75309e+07	6.83232e+07	5.81829e+07		3.67021e+06	1.32556e+07	1.73659e+07	1.04012e+07		1.64137e+06	6.6278e+06	7.08962e+06	3.93128e+06
7	UHPLC/MS/MS Data	PE 36:2 (18:0/18:2)		Peak Area/mg protein	7.82819e+07	7.97457e+07	5.86529e+07	5.04185e+07	4.21275e+07		1.83389e+07	4.03555e+07	1.59486e+07	2.49022e+07		1.80784e+07	2.76337e+07	2.79471e+07	2.30388e+07	2.91493e+07	3.77462e+07		2.96809e+07	3.80714e+07	2.95607e+07	3.70011e+07	4.39913e+07	5.07803e+07	5.00542e+07		PE 36:2 (18:0/18:2)	6.18453e+07	2.48863e+07	2.72656e+07	3.98771e+07		1.67342e+07	1.09856e+07	6.57665e+06	8.76835e+06		7.48377e+06	5.49278e+06	2.6849e+06	3.31412e+06
8	UHPLC/MS/MS Data	PE 36:2 (18:1/18:1)		Peak Area/mg protein	5.84099e+07	7.50199e+07	5.93226e+07	5.47647e+07	4.53015e+07		1.66077e+07	3.45591e+07	1.97733e+07	2.79133e+07		1.87147e+07	3.10398e+07	2.9298e+07	2.14349e+07	2.86415e+07	3.83816e+07		3.03638e+07	3.93329e+07	2.95004e+07	3.18715e+07	4.59457e+07	4.75706e+07	5.30398e+07		PE 36:2 (18:1/18:1)	5.85637e+07	2.47134e+07	2.79184e+07	3.96607e+07		1.07439e+07	8.10933e+06	7.04828e+06	9.41197e+06		4.80481e+06	4.05467e+06	2.87745e+06	3.55739e+06
9	UHPLC/MS/MS Data	PE 36:3 (16:0/20:3)		Peak Area/mg protein	1.51333e+07	1.51271e+07	1.26822e+07	1.37075e+07	9.50735e+06		2.77253e+06	7.8829e+06	4.50723e+06	7.0431e+06		3.69297e+06	6.11382e+06	6393750	5.18127e+06	8.3903e+06	1.30984e+07		3.78631e+06	5.43205e+06	4.52811e+06	7.71063e+06	7.75651e+06	7.10386e+06	9.57751e+06		PE 36:3 (16:0/20:3)	1.32315e+07	5.55144e+06	7.14509e+06	6.55642e+06		2.3242e+06	2.34332e+06	3.29832e+06	2.05146e+06		1.03941e+06	1.17166e+06	1.34653e+06	775377
10	UHPLC/MS/MS Data	PE 36:3 (18:1/18:2)		Peak Area/mg protein	6.83366e+07	7.29984e+07	5.16226e+07	4.7406e+07	3.25973e+07		2.48592e+07	5.16237e+07	2.21654e+07	3.64831e+07		2.22692e+07	3.31721e+07	3.16245e+07	2.91458e+07	3.33768e+07	4.23963e+07		1.49515e+07	1.67584e+07	1.64908e+07	1.76967e+07	2.22951e+07	2.00287e+07	2.47302e+07		PE 36:3 (18:1/18:2)	5.45922e+07	3.37828e+07	3.19974e+07	1.89931e+07		1.63702e+07	1.34187e+07	6.54717e+06	3.5157e+06		7.32097e+06	6.70934e+06	2.67287e+06	1.32881e+06
11	UHPLC/MS/MS Data	PE 36:4 (16:0/20:4)		Peak Area/mg protein	1.20333e+08	1.64791e+08	1.14952e+08	1.03212e+08	8.18748e+07		8.68242e+07	1.66274e+08	9.15279e+07	1.31874e+08		9.28264e+07	1.37796e+08	1.42872e+08	1.12761e+08	1.49698e+08	1.78617e+08		4.13003e+07	6.82541e+07	5.13299e+07	4.93542e+07	6.56814e+07	5.99016e+07	6.3636e+07		PE 36:4 (16:0/20:4)	1.17033e+08	1.19125e+08	1.35762e+08	5.70654e+07		3.05087e+07	3.73741e+07	2.98596e+07	9.92923e+06		1.36439e+07	1.8687e+07	1.21901e+07	3.7529e+06
12	UHPLC/MS/MS Data	PE 36:4 (18:2/18:2)		Peak Area/mg protein	5.16113e+07	5.14084e+07	2.82336e+07	3.08752e+07	2.46828e+07		5.65345e+06	1.36988e+07	6.2469e+06	1.14456e+07		6.0504e+06	8.34954e+06	9.74241e+06	8.11873e+06	7.08631e+06	9.70252e+06		5.06301e+06	5.80544e+06	4.99878e+06	5.17176e+06	6.81147e+06	6.50981e+06	6.57506e+06		PE 36:4 (18:2/18:2)	3.73622e+07	9.2612e+06	8.17498e+06	5.8479e+06		1.31007e+07	3.9398e+06	1.45071e+06	784367		5.8588e+06	1.9699e+06	592251	296463
13	UHPLC/MS/MS Data	PE 36:5 (16:0/20:5)		Peak Area/mg protein	1.03958e+07	1.2926e+07	7.81073e+06	8.53743e+06	5.03961e+06		2.11987e+06	4.50639e+06	1.80968e+06	3.29791e+06		1.55513e+06	2.03415e+06	1.84207e+06	2.43834e+06	2.60802e+06	3.69914e+06		3.71807e+07	5.12034e+07	3.32577e+07	4.22863e+07	6.97707e+07	6.28239e+07	6.59408e+07		PE 36:5 (16:0/20:5)	8.9419e+06	2.93346e+06	2.36281e+06	5.17805e+07		2.94353e+06	1.22906e+06	759360	1.4679e+07		1.31639e+06	614528	310008	5.54814e+06
14	UHPLC/MS/MS Data	PE 36:5 (16:1/20:4)		Peak Area/mg protein	3.37538e+06	4.26494e+06	1.19312e+06	1.26573e+06	1.05247e+06		4.21457e+06	7.15701e+06	1.79998e+06	3.17331e+06		1.68191e+06	1.99108e+06	2.17384e+06	2.85567e+06	2.71829e+06	3.17681e+06		1.2918e+06	1.42907e+06	1.08999e+06	1.36369e+06	1.49119e+06	1.6434e+06	1.74176e+06		PE 36:5 (16:1/20:4)	2.23033e+06	4.08622e+06	2.43293e+06	1.43584e+06		1.48698e+06	2.27351e+06	572694	218077		664996	1.13675e+06	233801	82425.2
15	UHPLC/MS/MS Data	PE 37:4 (17:0/20:4)		Peak Area/mg protein	9.44929e+06	1.30238e+07	8.82085e+06	7.4466e+06	5.78632e+06		6.04781e+06	1.54509e+07	6.24552e+06	1.09712e+07		5.54167e+06	8.59712e+06	9.31088e+06	8.45592e+06	1.16259e+07	1.30125e+07		3.80337e+06	8.59651e+06	4.31308e+06	5.21208e+06	8.15302e+06	8.59025e+06	7.33948e+06		PE 37:4 (17:0/20:4)	8.90538e+06	9.67885e+06	9.424e+06	6.57254e+06		2.6982e+06	4.47059e+06	2.62419e+06	2.07678e+06		1.20667e+06	2.2353e+06	1.07132e+06	784949
16	UHPLC/MS/MS Data	PE 37:5 (17:1/20:4)		Peak Area/mg protein	1.32686e+06	1.97643e+06	1.25747e+06	1.13763e+06	713542		2.27115e+06	4.49457e+06	2.9844e+06	4.35031e+06		3.38783e+06	4.5272e+06	4.78996e+06	3.59517e+06	4.20961e+06	4.67547e+06		1.97698e+06	2.04873e+06	1.32617e+06	1.84448e+06	2.51798e+06	2.50986e+06	2.62796e+06		PE 37:5 (17:1/20:4)	1.28239e+06	3.52511e+06	4.19754e+06	2.12174e+06		455203	1.0779e+06	584238	465474		203573	538950	238514	175933
17	UHPLC/MS/MS Data	PE 38:1 (18:0/20:1)		Peak Area/mg protein	4.8429e+06	6.0511e+06	6.04284e+06	5.05046e+06	3.39738e+06		9.80031e+06	1.53378e+07	9.72343e+06	1.25014e+07		1.33844e+07	1.82743e+07	1.67653e+07	1.19471e+07	1.72875e+07	2.14195e+07		1.66279e+07	1.43881e+07	1.14145e+07	1.65586e+07	1.97527e+07	2.07541e+07	1.81603e+07		PE 38:1 (18:0/20:1)	5.07693e+06	1.18407e+07	1.6513e+07	1.6808e+07		1.09068e+06	2.66535e+06	3.41983e+06	3.19146e+06		487766	1.33267e+06	1.39614e+06	1.20626e+06
18	UHPLC/MS/MS Data	PE 38:2 (18:1/20:1)		Peak Area/mg protein	2.60637e+07	2.89857e+07	2.74698e+07	2.38639e+07	1.79335e+07		8.02294e+06	2.24149e+07	7.9288e+06	1.83903e+07		8.80317e+06	1.5333e+07	1.41058e+07	1.09785e+07	1.39427e+07	2.84379e+07		1.98933e+07	2.06498e+07	1.77323e+07	2.25797e+07	2.54539e+07	2.76746e+07	2.90443e+07		PE 38:2 (18:1/20:1)	2.48633e+07	1.41892e+07	1.52668e+07	2.32897e+07		4.3084e+06	7.3604e+06	6.88115e+06	4.22139e+06		1.92678e+06	3.6802e+06	2.80922e+06	1.59553e+06
19	UHPLC/MS/MS Data	PE 38:3 (18:0/20:3)		Peak Area/mg protein	2.26854e+07	2.8844e+07	2.16028e+07	17772161	1.13294e+07		2.13204e+07	2.38493e+07	6.15623e+06	1.26904e+07		1.09194e+07	1.11372e+07	1.55603e+07	9.57846e+06	1.1865e+07	1.48753e+07		2.13549e+07	2.36704e+07	2.0877e+07	1.06738e+07	1.37811e+07	1.74914e+07	1.21997e+07		PE 38:3 (18:0/20:3)	2.04468e+07	1.60041e+07	1.23226e+07	1.71498e+07		6.46415e+06	8.11933e+06	2.3712e+06	5.03323e+06		2.89086e+06	4.05966e+06	968040	1.90238e+06
20	UHPLC/MS/MS Data	PE 38:4 (16:0/22:4)		Peak Area/mg protein	1.78353e+07	2.44601e+07	2.02444e+07	1.99227e+07	1.58297e+07		2.08655e+07	4.06511e+07	2.83097e+07	3.24237e+07		2.93234e+07	3.87634e+07	4.02686e+07	3.09378e+07	4.04194e+07	4.89493e+07		8.46801e+06	1.19241e+07	7.90523e+06	1.02147e+07	1.19533e+07	1.17961e+07	1.30153e+07		PE 38:4 (16:0/22:4)	1.96584e+07	3.05625e+07	3.81103e+07	1.07538e+07		3.21918e+06	8.2533e+06	7.16318e+06	1.94246e+06		1.43966e+06	4.12665e+06	2.92436e+06	734182
21	UHPLC/MS/MS Data	PE 38:4 (18:0/20:4)		Peak Area/mg protein	2.22946e+08	2.78355e+08	2.25028e+08	1.87815e+08	1.48791e+08		122119085	273041641	1.28727e+08	1.99163e+08		1.34481e+08	1.79933e+08	2.11391e+08	1.66934e+08	2.2432e+08	2.64866e+08		8.05142e+07	1.46815e+08	9.68646e+07	1.03002e+08	1.41001e+08	1.58582e+08	147179000		PE 38:4 (18:0/20:4)	2.12587e+08	1.80763e+08	1.96988e+08	1.24851e+08		4.81432e+07	7.07125e+07	4.61805e+07	3.05667e+07		2.15303e+07	3.53562e+07	1.88531e+07	1.15531e+07
22	UHPLC/MS/MS Data	PE 38:5 (16:0/22:5)		Peak Area/mg protein	1.30366e+07	1.73518e+07	1.61651e+07	1.63616e+07	1.23925e+07		1.9328e+07	4.11273e+07	2.91701e+07	3.64778e+07		2.32518e+07	3.32525e+07	3.62276e+07	3.46412e+07	4.79095e+07	5.45702e+07		6.68332e+06	8.24891e+06	5.81144e+06	8.76178e+06	8.79533e+06	263909	1.01821e+07		PE 38:5 (16:0/22:5)	1.50615e+07	3.15258e+07	3.83088e+07	6.96383e+06		2.20099e+06	9.50519e+06	1.11953e+07	3.28865e+06		984312	4.7526e+06	4.57044e+06	1.24299e+06
23	UHPLC/MS/MS Data	PE 38:5 (18:0/20:5)		Peak Area/mg protein	2.28577e+07	2.66241e+07	2.10497e+07	1.80901e+07	1.0785e+07		1.61099e+07	2.60721e+07	1.52145e+07	1.79865e+07		1.84263e+07	2.635e+07	32036750	2.32316e+07	3.54641e+07	4.47086e+07		6.55932e+07	1.05129e+08	6.07019e+07	7.97972e+07	1.2132e+08	1.42256e+08	1.38324e+08		PE 38:5 (18:0/20:5)	1.98813e+07	1.88458e+07	3.00362e+07	1.01875e+08		5.95066e+06	4.95408e+06	9.41726e+06	3.37808e+07		2.66122e+06	2.47704e+06	3.84458e+06	1.27679e+07
24	UHPLC/MS/MS Data	PE 38:5 (18:1/20:4)		Peak Area/mg protein	6.566e+07	8.7679e+07	6.78694e+07	6.01899e+07	3.9492e+07		1.13342e+08	2.27049e+08	1.21059e+08	186027521		1.28911e+08	1.84718e+08	1.89787e+08	1.5851e+08	2.00752e+08	2.36139e+08		4.1455e+07	5.38527e+07	4.33553e+07	4.76697e+07	5.94892e+07	5.8679e+07	6.31386e+07		PE 38:5 (18:1/20:4)	6.41781e+07	1.6187e+08	1.83136e+08	5.25199e+07		1.7273e+07	5.43214e+07	3.6642e+07	8.47533e+06		7.7247e+06	2.71607e+07	1.4959e+07	3.20337e+06
25	UHPLC/MS/MS Data	PE 38:6 (16:0/22:6)		Peak Area/mg protein	2.35361e+08	2.71236e+08	2.34973e+08	2.34194e+08	1.58601e+08		1.55379e+08	2.57275e+08	1.38498e+08	1.82482e+08		1.5499e+08	1.92141e+08	1.94297e+08	160002862	2.16391e+08	2.54372e+08		2.24729e+08	2.90138e+08	222538863	2.32962e+08	3.08507e+08	2.99391e+08	2.86318e+08		PE 38:6 (16:0/22:6)	2.26873e+08	1.83408e+08	1.95366e+08	2.66369e+08		4.12929e+07	5.24712e+07	3.69217e+07	3.78594e+07		1.84667e+07	2.62356e+07	1.50732e+07	1.43095e+07
26	UHPLC/MS/MS Data	PE 38:7 (16:1/22:6)		Peak Area/mg protein	3.28132e+06	3.35705e+06	7.29032e+06	4.48439e+06	3.16768e+06		5.16088e+06	7.32227e+06	5.90113e+06	7.69171e+06		4.73486e+06	6.75305e+06	7.08049e+06	5.77851e+06	5.39853e+06	7.09696e+06		3.66702e+06	5.045e+06	3.8778e+06	3.4509e+06	6.55188e+06	5.82432e+06	5.43708e+06		PE 38:7 (16:1/22:6)	4.31615e+06	6.519e+06	6.1404e+06	4.83629e+06		1.74526e+06	1.18978e+06	982954	1.19228e+06		780505	594892	401289	450639
27	UHPLC/MS/MS Data	PE 39:5 (19:1/20:4)		Peak Area/mg protein	1.91713e+06	2.70673e+06	1.9711e+06	1.71103e+06	1.24434e+06		2.76271e+06	5.53063e+06	3.85141e+06	5.20834e+06		3.15136e+06	4.42415e+06	5.57993e+06	3.60858e+06	5.30264e+06	6.06455e+06		68628.9	93835.1	67995.3	81861.4	166193	112932	209879		PE 39:5 (19:1/20:4)	1.91007e+06	4.33827e+06	4.68854e+06	114475		529449	1.27778e+06	1.15449e+06	54054		236777	638891	471319	20430.5
28	UHPLC/MS/MS Data	PE 39:6 (17:0/22:6)		Peak Area/mg protein	5.23315e+06	5.94147e+06	4.32419e+06	4.04402e+06	2.90647e+06		3.75168e+06	7.22553e+06	4.51224e+06	6.36799e+06		3.75613e+06	5.20337e+06	6.21736e+06	4.41961e+06	5.80709e+06	6.63996e+06		1.18833e+06	1.28066e+06	1.05644e+06	861652	1.26079e+06	1.46475e+06	1.21012e+06		PE 39:6 (17:0/22:6)	4.48986e+06	5.46436e+06	5.34059e+06	1.18896e+06		1.16114e+06	1.60811e+06	1.1002e+06	189196		519278	804055	449156	71509.4
29	UHPLC/MS/MS Data	PE 40:4 (18:0/22:4)		Peak Area/mg protein	2.82945e+06	3.62521e+06	2.21628e+06	2.14881e+06	1.37869e+06		4.1659e+06	8.95698e+06	3.35632e+06	5.142e+06		5.01178e+06	7.66757e+06	8.72548e+06	5.04376e+06	8.74564e+06	1.15604e+07		1.62884e+06	1.80831e+06	29182.2	1.6217e+06	1.86333e+06	2.18551e+06	1.72655e+06		PE 40:4 (18:0/22:4)	2.43969e+06	5.4053e+06	7.79245e+06	1.55192e+06		839290	2.47778e+06	2.5012e+06	698112		375342	1.23889e+06	1.02111e+06	263862
30	UHPLC/MS/MS Data	PE 40:4 (20:0/20:4)		Peak Area/mg protein	1.54746e+07	1.94263e+07	1.89938e+07	1.60539e+07	1.05905e+07		1.36892e+07	2.16735e+07	1.60912e+07	1.89396e+07		1.88116e+07	2.51956e+07	2.31928e+07	2.17418e+07	3.29157e+07	3.21693e+07		5.1247e+06	7.32472e+06	4.75652e+06	6.16058e+06	6.88282e+06	7.63933e+06	7.94199e+06		PE 40:4 (20:0/20:4)	1.61078e+07	1.75984e+07	2.56711e+07	6.54724e+06		3.5421e+06	3.46211e+06	5.71963e+06	1.24062e+06		1.58408e+06	1.73105e+06	2.33503e+06	468912
31	UHPLC/MS/MS Data	PE 40:5 (18:0/22:5)		Peak Area/mg protein	1.8304e+07	2.30515e+07	2.12101e+07	1.82027e+07	1.19691e+07		1.78551e+07	3.06305e+07	1.94475e+07	2.40816e+07		2.38234e+07	3.28632e+07	3.19183e+07	2.67855e+07	4.16613e+07	4.37298e+07		6.75353e+06	9.13302e+06	4.7857e+06	7.78227e+06	8.74615e+06	9.82485e+06	9.66853e+06		PE 40:5 (18:0/22:5)	1.85475e+07	2.30037e+07	3.34636e+07	8.09915e+06		4.20797e+06	5.72957e+06	7.91044e+06	1.81744e+06		1.88186e+06	2.86478e+06	3.22942e+06	686928
32	UHPLC/MS/MS Data	PE 40:5 (18:1/22:4)		Peak Area/mg protein	5.18639e+06	6.22861e+06	6.08212e+06	5.49204e+06	3.63994e+06		1.03335e+07	1.6211e+07	1.42404e+07	1.67083e+07		1.47853e+07	2.14819e+07	1.88352e+07	1.59442e+07	2.26949e+07	2.52965e+07		1.23569e+06	65014.3	44022.6	68324.8	72820.5	79658.6	1.74765e+06		PE 40:5 (18:1/22:4)	5.32582e+06	1.43733e+07	1.98396e+07	473312		1.03396e+06	2.8964e+06	4.05847e+06	711282		462400	1.4482e+06	1.65686e+06	268839
33	UHPLC/MS/MS Data	PE 40:6 (18:0/22:6)		Peak Area/mg protein	1.51492e+08	1.70433e+08	1.38289e+08	1.19108e+08	8.34876e+07		8.90529e+07	1.80096e+08	8.07605e+07	1.20314e+08		9.37439e+07	1.33334e+08	1.28474e+08	1.04372e+08	1.53246e+08	1.90691e+08		1.81554e+08	2.33685e+08	1.61664e+08	1.90418e+08	2.46299e+08	2.6413e+08	2.43306e+08		PE 40:6 (18:0/22:6)	1.32562e+08	1.17556e+08	1.33977e+08	2.17294e+08		3.32216e+07	4.50377e+07	3.49674e+07	3.88899e+07		1.48571e+07	2.25189e+07	1.42754e+07	1.4699e+07
34	UHPLC/MS/MS Data	PE 40:7 (18:1/22:6)		Peak Area/mg protein	1.13629e+08	1.41458e+08	3.31268e+06	1.14292e+08	6.76622e+07		9.35948e+07	1.66655e+08	9.90943e+07	1.36427e+08		100827599	1.45145e+08	140506627	1.17581e+08	1.57141e+08	194411304		1.43709e+08	1.72549e+06	1.30469e+08	1.58148e+08	2.09864e+08	1.67686e+06	2.09359e+08		PE 40:7 (18:1/22:6)	8.80709e+07	1.23943e+08	142602131	1.22136e+08		5.42942e+07	3.42475e+07	3.24887e+07	8.76974e+07		2.42811e+07	1.71237e+07	1.32635e+07	3.31465e+07
35	UHPLC/MS/MS Data	PE 42:6 (20:0/22:6)		Peak Area/mg protein	1.08142e+07	1.18445e+07	1.28727e+07	1.11356e+07	7.94951e+06		4.00853e+06	6.89424e+06	4.50949e+06	6.21739e+06		4.51753e+06	6.4964e+06	5.39998e+06	4.9932e+06	8.52553e+06	8.94041e+06		1.36202e+07	1.7193e+07	1.15643e+07	1.62741e+07	2.05646e+07	2.54071e+07	2.2494e+07		PE 42:6 (20:0/22:6)	1.09233e+07	5.40741e+06	6.47884e+06	1.81596e+07		1.84047e+06	1.3699e+06	1.86903e+06	4.92767e+06		823082	684948	763029	1.86248e+06
1	UHPLC/MS/MS Data	PG 34:1 (16:0/18:1)		Peak Area/mg protein	8.15359e+06	1.12521e+07	8.28957e+06	7.78001e+06	5.01045e+06		1.22203e+07	2.02279e+07	1.00299e+07	1.45852e+07		1.54385e+07	2.03784e+07	1.93646e+07	1.22113e+07	1.97793e+07	2.84663e+07		1.74061e+07	2.36954e+07	1.53017e+07	1.77051e+07	2.35168e+07	2.04361e+07	2.35014e+07		PG 34:1 (16:0/18:1)	8.09714e+06	1.42658e+07	1.92731e+07	2.02232e+07		2.21484e+06	4.38841e+06	5.48769e+06	3.46876e+06		990505	2.19421e+06	2.24034e+06	1.31107e+06
2	UHPLC/MS/MS Data	PG 34:2 (16:0/18:2)		Peak Area/mg protein	3.53125e+06	5685000	3.94512e+06	3.62728e+06	1.96403e+06		2.58979e+06	3.81993e+06	1.85142e+06	2.63799e+06		4.28085e+06	6.37468e+06	5.4709e+06	2.51296e+06	4.88512e+06	1.11099e+07		3.61188e+06	1.2463e+07	6.44908e+06	4.49763e+06	8.49888e+06	4.99765e+06	5.17979e+06		PG 34:2 (16:0/18:2)	3.75054e+06	2.72478e+06	5.77239e+06	6.52827e+06		1.32617e+06	814017	2.91815e+06	3.05233e+06		593081	407008	1.19133e+06	1.15367e+06
3	UHPLC/MS/MS Data	PG 34:2 (16:1/18:1)		Peak Area/mg protein	308313	564755	304714	191539	217575		5.18351e+06	9.34704e+06	3.34014e+06	3.69826e+06		4.28917e+06	8.862e+06	8.10468e+06	4.42243e+06	5.88116e+06	1.24248e+07		959537	1.06294e+06	902566	1.04243e+06	736263	746281	694267		PG 34:2 (16:1/18:1)	317379	5.39224e+06	7.33071e+06	877756		147677	2.75467e+06	3.12102e+06	152584		66043.2	1.37734e+06	1.27415e+06	57671.4
4	UHPLC/MS/MS Data	PG 36:2 (18:1/18:1)		Peak Area/mg protein	2.63236e+06	3.77838e+06	2.18512e+06	1.66036e+06	1.37045e+06		3.3521e+07	4.76998e+07	2.29451e+07	2.43114e+07		3.2192e+07	7.83798e+07	6.56478e+07	3.21116e+07	5.01525e+07	8.421e+07		1.03534e+07	1.08949e+07	9.00678e+06	1.2955e+07	8.4242e+06	9.7026e+06	8.72466e+06		PG 36:2 (18:1/18:1)	2.32533e+06	3.21193e+07	5.71156e+07	1.00088e+07		945946	1.13995e+07	2.26006e+07	1.57278e+06		423040	5.69975e+06	9.22667e+06	594457
5	UHPLC/MS/MS Data	PG 36:3 (18:1/18:2)		Peak Area/mg protein	5.97789e+06	8.20911e+06	3.58253e+06	2.72994e+06	2.9815e+06		1.28191e+07	2.23705e+07	8.38686e+06	1.00236e+07		1.02552e+07	2.53082e+07	2.15749e+07	1.21991e+07	1.83218e+07	3.14613e+07		3.02979e+06	3.49411e+06	2.935e+06	3.50928e+06	2.26226e+06	2.53666e+06	2.24595e+06		PG 36:3 (18:1/18:2)	4.69619e+06	1.34e+07	1.98534e+07	2.85901e+06		2.3468e+06	6.25405e+06	8.00651e+06	531822		1.04952e+06	3.12702e+06	3.26864e+06	201010
6	UHPLC/MS/MS Data	PG 36:4 (16:0/20:4)		Peak Area/mg protein	215214	324662	210594	221703	122046		623241	652704	303552	332027		1.27708e+06	1.53671e+06	1.48972e+06	455690	1.23334e+06	3.27661e+06		231326	831568	370969	333824	435333	253603	231218		PG 36:4 (16:0/20:4)	218844	477881	1.54486e+06	383977		71862.3	185613	933499	211855		32137.8	92806.5	381099	80073.5
7	UHPLC/MS/MS Data	PG 36:4 (18:2/18:2)		Peak Area/mg protein	3.31203e+06	4.02844e+06	2.08701e+06	1.52719e+06	2.02214e+06		1.62013e+06	4.60423e+06	1.15096e+06	1.53384e+06		1.10892e+06	2.96723e+06	2.87205e+06	1.54831e+06	2.427e+06	5.13792e+06		270607	380595	320422	325465	286717	291964	181296		PG 36:4 (18:2/18:2)	2.59536e+06	2.22729e+06	2.67691e+06	293867		1.03626e+06	1.59769e+06	1.41235e+06	61228.4		463429	798846	576591	23142.2
8	UHPLC/MS/MS Data	PG 36:5 (16:1/20:4)		Peak Area/mg protein	5232.73	11068.6	95142.1	62404.8	2409.09		904557	1.33397e+06	580881	691224		721158	1.45692e+06	1.44612e+06	881219	1.37351e+06	2.75382e+06		67054.7	289641	108719	237839	1915.95	2697.46	2358.62		PG 36:5 (16:1/20:4)	35251.5	877657	1.43879e+06	101461		41499.2	332553	715517	118836		18559	166277	292109	44915.7
9	UHPLC/MS/MS Data	PG 38:1 (20:0/18:1)		Peak Area/mg protein	5889.64	10669.9	52611.9	3116.28	3960.61		142349	230200	2.01394e+06	2.80455e+06		2.3946e+06	6.10756e+06	5.26181e+06	3.09029e+06	4.25643e+06	6.82583e+06		1.06923e+06	816189	664312	1.03978e+06	488836	652179	461420		PG 38:1 (20:0/18:1)	15249.6	1.29776e+06	4.65608e+06	741706		21090.2	1.32388e+06	1.72669e+06	244327		9431.81	661941	704916	92346.9
10	UHPLC/MS/MS Data	PG 38:2 (18:1/20:1)		Peak Area/mg protein	4211.71	215405	12688.7	7477.64	4763.64		5.16754e+06	6.06882e+06	4.46955e+06	4.32919e+06		6.31661e+06	1.71899e+07	1.45161e+07	5.28511e+06	7.54794e+06	1.20648e+07		1.05379e+06	10164.9	797956	1.06006e+06	791358	784255	416913		PG 38:2 (18:1/20:1)	48909.4	5.00878e+06	1.04868e+07	702071		93134.5	796134	4.83203e+06	373237		41651	398067	1.97267e+06	141070
11	UHPLC/MS/MS Data	PG 38:4 (18:0/20:4)		Peak Area/mg protein	530866	735816	516145	410208	327962		815982	213158	510904	567612		1.61849e+06	2.50876e+06	2.04097e+06	652064	1.89065e+06	4.12475e+06		549121	1.50499e+06	673268	669006	917715	662689	661580		PG 38:4 (18:0/20:4)	504199	526914	2.13928e+06	805481		153618	247599	1.15179e+06	327828		68700.1	123799	470217	123908
12	UHPLC/MS/MS Data	PG 38:4 (18:1/20:3)		Peak Area/mg protein	490772	618907	372218	287159	228021		5.41674e+06	6.12432e+06	3.29575e+06	3.44869e+06		5.29871e+06	1.24897e+07	9.00063e+06	4.31775e+06	7.70154e+06	1.19965e+07		645024	1.0871e+06	886381	969935	503735	559116	554262		PG 38:4 (18:1/20:3)	399415	4.57137e+06	8.46747e+06	743651		157512	1.41585e+06	3.3694e+06	233360		70441.4	707926	1.37555e+06	88201.8
13	UHPLC/MS/MS Data	PG 38:5 (18:1/20:4)		Peak Area/mg protein	1.03089e+06	1.68428e+06	999662	787950	696902		1.16488e+07	1.63493e+07	8.07005e+06	9.44925e+06		1.20283e+07	2.75181e+07	2.16381e+07	1.21491e+07	21776590	3.31494e+07		1.10992e+06	1.28456e+06	1.08743e+06	1.38827e+06	746610	1.04492e+06	836186		PG 38:5 (18:1/20:4)	1.03994e+06	1.13794e+07	2.13766e+07	1.07113e+06		386668	3.62629e+06	8.35561e+06	226973		172923	1.81315e+06	3.41116e+06	85787.9
14	UHPLC/MS/MS Data	PG 38:6 (18:2/20:4)		Peak Area/mg protein	45525.5	66439.4	1.26082e+06	889453	885255		2.73716e+06	4.89487e+06	2.22134e+06	2.65597e+06		2.45261e+06	6.39125e+06	5.60635e+06	3.14195e+06	5.58874e+06	1.01338e+07		1.52333e+06	2.10897e+06	1.43891e+06	2.05598e+06	1.52165e+06	1.63049e+06	1.48973e+06		PG 38:6 (18:2/20:4)	629499	3.12734e+06	5.55245e+06	1.6813e+06		545348	1.19992e+06	2.72456e+06	280406		243887	599961	1.1123e+06	105984
15	UHPLC/MS/MS Data	PG 38:7 (16:1/22:6)		Peak Area/mg protein	944062	1.47021e+06	1.07517e+06	1.28942e+06	594067		2.01938e+06	7.56553e+06	1.78477e+06	3.07574e+06		1.68422e+06	3.02589e+06	3.02034e+06	1.78452e+06	3.20912e+06	6.51353e+06		3.41078e+06	3.35742e+06	2.77305e+06	2.72305e+06	2.59778e+06	2.11615e+06	2.33067e+06		PG 38:7 (16:1/22:6)	1.07459e+06	3.61136e+06	3.20627e+06	2.75842e+06		335636	2.69525e+06	1.75175e+06	484273		150101	1.34763e+06	715148	183038
16	UHPLC/MS/MS Data	PG 40:5 (18:1/22:4)		Peak Area/mg protein	543878	776834	615182	441644	252407		3.50329e+06	5.07148e+06	2.30767e+06	2.95241e+06		3.61738e+06	7.68114e+06	6.22558e+06	3.35856e+06	5.98394e+06	9.31596e+06		644702	10243.7	9345.08	17329.9	7692.31	13400.3	10300		PG 40:5 (18:1/22:4)	525989	3.45871e+06	6.03043e+06	101859		195678	1.181e+06	2.30311e+06	239392		87509.9	590498	940240	90481.7
17	UHPLC/MS/MS Data	PG 40:6 (18:1/22:5)		Peak Area/mg protein	633354	918211	719868	524218	302118		3.50404e+06	5.07266e+06	2.30814e+06	2.95328e+06		3.61769e+06	7.68225e+06	6.22627e+06	3.35926e+06	5.98484e+06	9.37744e+06		888456	352788	217196	332016	330653	296188	250783		PG 40:6 (18:1/22:5)	619554	3.45953e+06	6.04129e+06	381154		228749	1.18126e+06	2.32065e+06	228846		102300	590632	947403	86495.6
18	UHPLC/MS/MS Data	PG 40:7 (18:1/22:6)		Peak Area/mg protein	3.74389e+06	6.16879e+06	3.11207e+06	2.65119e+06	1.89901e+06		1.56104e+07	2.37499e+07	1.11114e+07	1.32774e+07		1.67653e+07	2.83434e+07	2.55694e+07	1.4997e+07	3.26873e+07	5.0201e+07		3.24265e+07	4.06873e+07	2.89011e+07	3.58263e+07	3.00812e+07	2.25005e+07	2.33197e+07		PG 40:7 (18:1/22:6)	3.51499e+06	1.59373e+07	2.80939e+07	3.05347e+07		1.62903e+06	5.52291e+06	1.2776e+07	6.50811e+06		728524	2.76145e+06	5.21576e+06	2.45983e+06
19	UHPLC/MS/MS Data	PG 40:8 (18:2/22:6)		Peak Area/mg protein	6.1041e+06	9.57074e+06	4.92681e+06	4.7558e+06	3.39756e+06		4.13156e+06	6.83612e+06	3.15808e+06	4.28278e+06		4.22119e+06	8.038e+06	7.11404e+06	4.5486e+06	9.67206e+06	1.6768e+07		5.63334e+06	8.64955e+06	5.42936e+06	6.58558e+06	5.73603e+06	4.50888e+06	4.45961e+06		PG 40:8 (18:2/22:6)	5.751e+06	4.60213e+06	8.39364e+06	5.85748e+06		2.34113e+06	1.5705e+06	4.59829e+06	1.4345e+06		1.04698e+06	785250	1.87724e+06	542192
20	UHPLC/MS/MS Data	PG 42:10 (20:4/22:6)		Peak Area/mg protein	6.60508e+06	1.0351e+07	5.49593e+06	5.22949e+06	3.7192e+06		4.44382e+06	7.2008e+06	3.58885e+06	4.46601e+06		4.53511e+06	8.63324e+06	7.6542e+06	4.90667e+06	1.0282e+07	1.79436e+07		5.93089e+06	9.17149e+06	5.75631e+06	6.98511e+06	6.12017e+06	4.79653e+06	4.75501e+06		PG 42:10 (20:4/22:6)	6.28015e+06	4.92487e+06	8.99247e+06	6.2165e+06		2.49775e+06	1.57128e+06	4.90443e+06	1.51535e+06		1.11703e+06	785640	2.00223e+06	572747
21	UHPLC/MS/MS Data	PG 42:8 (20:4/22:4)		Peak Area/mg protein	393657	649251	521464	460193	222167		111029	157835	86277	120645		116480	197554	165018	114654	222023	386941		4.88472e+06	7.47876e+06	3.7784e+06	6.26137e+06	6.06974e+06	4.33949e+06	4.07968e+06		PG 42:8 (20:4/22:4)	449346	118947	200445	5.27031e+06		158108	29694	100916	1.36364e+06		70707.9	14847	41198.7	515407
22	UHPLC/MS/MS Data	PG 42:9 (20:3/22:6)		Peak Area/mg protein	107416	473710	329162	129112	220160		1.54922e+06	2.23654e+06	1.15704e+06	1.57319e+06		1.97819e+06	3.52567e+06	2.53317e+06	1.75112e+06	1.90298e+06	5.39378e+06		452543	566627	433527	576416	495741	166440	416820		PG 42:9 (20:3/22:6)	251912	1.629e+06	2.84749e+06	444016		151764	447710	1.40657e+06	137362		67870.8	223855	574228	51917.9
23	UHPLC/MS/MS Data	PG 42:11 (20:5/22:6)		Peak Area/mg protein	501073	1.12296e+06	850626	589304	442327		1.66025e+06	2.39438e+06	1.24332e+06	1.69384e+06		2.09467e+06	3.72322e+06	2.69819e+06	1.86577e+06	2.125e+06	5.78072e+06		5.33726e+06	8.04539e+06	4.21193e+06	6.83779e+06	6.56548e+06	4.50593e+06	4.4965e+06		PG 42:11 (20:5/22:6)	701258	1.74795e+06	3.04793e+06	5.71433e+06		282753	477194	1.49696e+06	1.45849e+06		126451	238597	611132	551258
24	UHPLC/MS/MS Data	PG 44:11 (22:5/22:6)		Peak Area/mg protein	608489	1.59667e+06	1.17979e+06	718416	662487		3.20947e+06	4.63092e+06	2.40036e+06	3.26703e+06		4.07285e+06	7.2489e+06	5.23137e+06	3.6169e+06	4.02799e+06	1.11745e+07		5.7898e+06	8.61202e+06	4.64545e+06	7.41421e+06	7.06122e+06	4.67237e+06	4913320		PG 44:11 (22:5/22:6)	953170	3.37694e+06	5.89542e+06	6.15834e+06		425400	924897	2.90318e+06	1.55969e+06		190244	462448	1.18522e+06	589506
25	UHPLC/MS/MS Data	PG 44:12 (22:6/22:6)		Peak Area/mg protein	3.32826e+06	6.54559e+06	6.82247e+06	2.1623e+07	1.88874e+06		3.35876e+06	1.03093e+07	8.71436e+06	1.29267e+07		5.86491e+06	9.15057e+06	5.74771e+06	3.47402e+06	1.08653e+07	1.38148e+07		1.17531e+08	1.42942e+08	8.40941e+07	1.13159e+08	1.17046e+08	7.26716e+07	1.01309e+08		PG 44:12 (22:6/22:6)	8.04162e+06	8.82728e+06	8.15288e+06	1.06965e+08		7.87803e+06	4.03811e+06	3.82939e+06	2.33706e+07		3.52316e+06	2.01906e+06	1.56334e+06	8.83325e+06
1	UHPLC/MS/MS Data	PI 36:1 (18:0/18:1)		Peak Area/mg protein	37672.7	42827	44626	43763.9	23406.1		949542	1.91724e+06	1.02484e+06	1.48895e+06		950899	1.87327e+06	1.8934e+06	1.87892e+06	2.37225e+06	2.90332e+06		4.55072e+06	3.69279e+06	2.97323e+06	4.61572e+06	6.65689e+06	6.5157e+06	7.48768e+06		PI 36:1 (18:0/18:1)	38459.1	1.34514e+06	1.97868e+06	5.21325e+06		8838.3	449839	647230	1.68716e+06		3952.61	224920	264230	637685
2	UHPLC/MS/MS Data	PI 36:2 (18:1/18:1)		Peak Area/mg protein	2.30572e+07	2.55707e+07	1.99299e+07	2.62667e+07	1.30075e+07		2.42425e+06	5.99949e+06	2.13218e+06	5.74822e+06		3.15977e+06	3.59194e+06	3.56402e+06	4.49912e+06	5.13875e+06	6.5674e+06		7.43079e+06	6.82839e+06	5.37366e+06	7.4873e+06	1.11683e+07	1.22885e+07	1.30733e+07		PI 36:2 (18:1/18:1)	2.15664e+07	4.07603e+06	4.42017e+06	9.09288e+06		5.39172e+06	2.08189e+06	1.27599e+06	3.01838e+06		2.41125e+06	1.04095e+06	520921	1.14084e+06
3	UHPLC/MS/MS Data	PI 36:3 (16:0/20:3)		Peak Area/mg protein	2.30949e+07	2.56135e+07	1.99745e+07	2.63104e+07	1.30309e+07		3.37379e+06	7.91672e+06	3.15702e+06	7.23717e+06		4.11067e+06	5.46521e+06	5.45742e+06	6.37804e+06	7.511e+06	9.47072e+06		1.19815e+07	1.05212e+07	8.34689e+06	1.2103e+07	1.78251e+07	1.88042e+07	2.0561e+07		PI 36:3 (16:0/20:3)	2.16049e+07	5.42118e+06	6.39884e+06	1.43061e+07		5.39914e+06	2.50624e+06	1.87976e+06	4.68748e+06		2.41457e+06	1.25312e+06	767409	1.7717e+06
4	UHPLC/MS/MS Data	PI 36:3 (18:1/18:2)		Peak Area/mg protein	1.10716e+07	1.50563e+07	8.62358e+06	1.08847e+07	5.40326e+06		1.89932e+06	8.47234e+06	1.38121e+06	2.50054e+06		1.03112e+06	2.13354e+06	1.93381e+06	1.66786e+06	2.47482e+06	2.84913e+06		1.87137e+06	1.98585e+06	1.83331e+06	1.93358e+06	736340	2.8376e+06	3.94155e+06		PI 36:3 (18:1/18:2)	1.02079e+07	3.56335e+06	2.01505e+06	2.1628e+06		3.54632e+06	3.30447e+06	635038	994271		1.58596e+06	1.65223e+06	259253	375799
5	UHPLC/MS/MS Data	PI 36:4 (16:0/20:4)		Peak Area/mg protein	3.41665e+07	4.06698e+07	2.85981e+07	3.71951e+07	1.84342e+07		5.27311e+06	1.63891e+07	4.53823e+06	9.73772e+06		5.14179e+06	7.59875e+06	7.39123e+06	8.0459e+06	9.98582e+06	1.23199e+07		1.38529e+07	1.2507e+07	1.01802e+07	1.40366e+07	1.85615e+07	2.16418e+07	2.45025e+07		PI 36:4 (16:0/20:4)	3.18127e+07	8.98453e+06	8.41389e+06	1.64689e+07		8.69308e+06	5.44483e+06	2.46089e+06	5.22303e+06		3.88766e+06	2.72242e+06	1.00465e+06	1.97412e+06
6	UHPLC/MS/MS Data	PI 36:5 (16:0/20:5)		Peak Area/mg protein	495273	749888	682780	612783	295940		235743	12661.5	6756.4	14019.6		5667.78	11898.2	11261.9	766453	1.09323e+06	11635.8		7.00081e+06	6.65894e+06	4.06502e+06	6.80461e+06	9.64548e+06	1.35656e+07	1.27873e+07		PI 36:5 (16:0/20:5)	567332	67295.1	316692	8.64682e+06		178583	112343	486062	3.49721e+06		79864.5	56171.3	198434	1.32182e+06
7	UHPLC/MS/MS Data	PI 37:4 (17:0/20:4)		Peak Area/mg protein	5.59952e+06	7.60909e+06	5.70025e+06	4.81512e+06	2.72996e+06		2.78759e+06	8.24556e+06	4.07996e+06	6.017e+06		2.71412e+06	5.37914e+06	5.15144e+06	4.72133e+06	6.76411e+06	6.94019e+06		3.85417e+06	4.88923e+06	3.26201e+06	4.4561e+06	5.87929e+06	7.58552e+06	7.0416e+06		PI 37:4 (17:0/20:4)	5.29079e+06	5.28253e+06	5.27839e+06	5.28113e+06		1.76221e+06	2.37977e+06	1.5415e+06	1.61836e+06		788086	1.18988e+06	629313	611683
8	UHPLC/MS/MS Data	PI 38:3 (18:0/20:3)		Peak Area/mg protein	5.97864e+06	8.28847e+06	6.29993e+06	5.31081e+06	2.73456e+06		4.04485e+06	1.05217e+07	5.56814e+06	8.43497e+06		4.0405e+06	7.53527e+06	7.62584e+06	6.87762e+06	9.90611e+06	1.13423e+07		4.89157e+06	6.31276e+06	4.39858e+06	5.86154e+06	7.47653e+06	8.58841e+06	8.21939e+06		PI 38:3 (18:0/20:3)	5.72248e+06	7.14241e+06	7.88795e+06	6.53554e+06		2.00503e+06	2.89617e+06	2.53071e+06	1.61804e+06		896675	1.44808e+06	1.03316e+06	611560
9	UHPLC/MS/MS Data	PI 38:4 (18:0/20:4)		Peak Area/mg protein	2.55301e+08	292503110	2.59948e+08	2.36595e+08	1.8477e+08		1.74895e+08	3.04195e+08	186967564	2.364e+08		1.85383e+08	2.68969e+08	2.60994e+08	2.08584e+08	3.0318e+08	3.28748e+08		179405698	2.1523e+08	1.59347e+08	1.92176e+08	237681802	2.69992e+08	263575931		PI 38:4 (18:0/20:4)	2.45823e+08	2.25615e+08	2.5931e+08	2.16773e+08		3.96263e+07	5.87571e+07	5.45539e+07	4.23506e+07		1.77214e+07	2.93786e+07	2.22715e+07	1.6007e+07
10	UHPLC/MS/MS Data	PI 38:5 (18:1/20:4)		Peak Area/mg protein	2.4184e+07	3.28e+07	2.01241e+07	1.66295e+07	1.14717e+07		3.90863e+07	9.7185e+07	3.49109e+07	8.3991e+07		4.03896e+07	7.63752e+07	6.81662e+07	6.36106e+07	9.27643e+07	9.34841e+07		1.97811e+07	447272	1.84996e+07	2.21197e+07	576410	1.26415e+06	34704000		PI 38:5 (18:1/20:4)	2.10419e+07	6.37933e+07	7.2465e+07	1.39132e+07		8.06264e+06	3.14515e+07	1.99743e+07	1.33808e+07		3.60572e+06	1.57257e+07	8.15447e+06	5.05746e+06
11	UHPLC/MS/MS Data	PI 38:6 (16:0/22:6)		Peak Area/mg protein	1.68147e+06	2.92373e+06	2.27126e+06	2.30294e+06	1.12283e+06		1.29312e+06	2.52576e+06	1.53648e+06	2.22677e+06		1.62187e+06	2.49275e+06	2.31944e+06	1.65501e+06	3.39412e+06	4.1029e+06		1.05709e+07	1.23654e+07	6.92164e+06	1.16238e+07	1.57707e+07	18846834	1.93928e+07		PI 38:6 (16:0/22:6)	2.06045e+06	1.89553e+06	2.59768e+06	1.36417e+07		683971	576983	982778	4.56419e+06		305881	288491	401217	1.7251e+06
12	UHPLC/MS/MS Data	PI 38:6 (18:1/20:5)		Peak Area/mg protein	761806	397734	879850	779157	220029		822134	1.69588e+06	1.20212e+06	1.78612e+06		990454	1.79368e+06	1.46211e+06	1.32892e+06	1.67503e+06	1.78309e+06		6.12458e+06	4.78766e+06	3.50565e+06	5.59979e+06	8.56854e+06	8.94589e+06	1.16604e+07		PI 38:6 (18:1/20:5)	607716	1.37656e+06	1.50555e+06	7.02751e+06		283543	450009	312148	2.82232e+06		126804	225004	127434	1.06674e+06
13	UHPLC/MS/MS Data	PI 39:4 (19:0/20:4)		Peak Area/mg protein	762538	399142	880686	780106	220660		940816	1.91428e+06	1.32145e+06	1.79055e+06		1.08682e+06	1.79707e+06	1.46661e+06	1.4757e+06	1.88655e+06	2.03766e+06		6.12607e+06	4.88157e+06	3.57058e+06	5.70354e+06	8.67462e+06	9.07995e+06	1.17743e+07		PI 39:4 (19:0/20:4)	608626	1.49177e+06	1.62507e+06	7.1158e+06		283510	447340	347942	2.84382e+06		126790	223670	142047	1.07486e+06
14	UHPLC/MS/MS Data	PI 40:5 (18:0/22:5)		Peak Area/mg protein	3.44469e+06	4.15269e+06	4.28627e+06	3.61982e+06	1.7538e+06		2.55111e+06	5.69672e+06	2.62314e+06	4.30122e+06		2.80322e+06	4.00954e+06	3.94126e+06	3.24287e+06	5.83641e+06	5.79146e+06		3.00566e+06	3.02812e+06	2.1404e+06	3.51065e+06	4.10088e+06	4.41651e+06	4.78947e+06		PI 40:5 (18:0/22:5)	3.45145e+06	3.79305e+06	4.27079e+06	3.57024e+06		1.01231e+06	1.5048e+06	1.27678e+06	926005		452718	752401	521242	349997
15	UHPLC/MS/MS Data	PI 40:6 (18:0/22:6)		Peak Area/mg protein	1.08383e+07	1.38899e+07	1.00564e+07	1.01253e+07	4.9725e+06		2.01356e+06	5.36784e+06	2.51402e+06	3.99845e+06		2.65653e+06	4.57677e+06	4.54854e+06	2.99516e+06	6.31161e+06	7.95613e+06		5.49354e+07	6.21568e+07	3.61474e+07	6.96492e+07	9.23026e+07	1.04833e+08	1.08136e+08		PI 40:6 (18:0/22:6)	9.97648e+06	3.47347e+06	4.84079e+06	7.54515e+07		3.20648e+06	1.51834e+06	2.01003e+06	2.70544e+07		1.43398e+06	759171	820590	1.02256e+07
16	UHPLC/MS/MS Data	PI 40:7 (18:1/22:6)		Peak Area/mg protein	560841	781787	639616	665184	266098		565144	1.0755e+06	719583	1.21108e+06		751351	1.22588e+06	1.04389e+06	416264	1.30582e+06	1.79111e+06		8.42381e+06	7.83369e+06	4.99195e+06	9.83179e+06	1.39356e+07	1.44198e+07	1.77238e+07		PI 40:7 (18:1/22:6)	582705	892827	1.08905e+06	1.10229e+07		193903	301134	474831	4.46547e+06		86716.1	150567	193849	1.68779e+06
1	UHPLC/MS/MS Data	PS 36:1 (18:0/18:1)		Peak Area/mg protein	3.68251e+06	810865	1.08165e+06	1.09477e+06	351748		414222	5.98295e+06	1.90138e+06	2.63398e+06		330832	4.58681e+06	6.33306e+06	4.06365e+06	7.68173e+06	1.04479e+07		7.04167e+06	4.87365e+06	5.12734e+06	6.43661e+06	8.90679e+06	5.95743e+06	7.44586e+06		PS 36:1 (18:0/18:1)	1.40431e+06	2.73313e+06	5.57399e+06	6.54134e+06		1.30864e+06	2.35516e+06	3.45021e+06	1.40216e+06		585243	1.17758e+06	1.40854e+06	529968
2	UHPLC/MS/MS Data	PS 36:4 (16:0/20:4)		Peak Area/mg protein	1.69074e+06	3.29038e+06	2.15672e+06	1.7053e+06	1.83698e+06		2.83087e+06	6.19166e+06	3.88844e+06	5.08989e+06		4.89036e+06	6.95036e+06	7.09877e+06	4.76756e+06	6.54812e+06	1.03554e+07		1.0823e+06	2.8321e+06	1.80885e+06	1.29809e+06	1.94589e+06	1.51223e+06	1.44255e+06		PS 36:4 (16:0/20:4)	2.13602e+06	4.50021e+06	6.76842e+06	1.70314e+06		671973	1.45713e+06	2.02916e+06	577138		300516	728565	828403	218138
3	UHPLC/MS/MS Data	PS 36:5 (16:0/20:5)		Peak Area/mg protein	339165	532299	532480	324352	218149		111098	256876	173032	218998		162918	2649.71	164570	161031	130897	217430		1.60544e+06	3.2078e+06	2.11569e+06	1.93891e+06	3.25793e+06	2.27766e+06	2.65271e+06		PS 36:5 (16:0/20:5)	389289	190001	139916	2.43659e+06		138720	62787.2	72821.1	630187		62037.7	31393.6	29729.1	238188
4	UHPLC/MS/MS Data	PS 38:3 (18:0/20:3)		Peak Area/mg protein	593845	936795	819377	576336	451261		528935	1.46405e+06	871138	1.11409e+06		677960	907159	1.07764e+06	1.02103e+06	1.08074e+06	1.5463e+06		1.79807e+06	3.55495e+06	2.12066e+06	2.12536e+06	3.55547e+06	2.54088e+06	2.90072e+06		PS 38:3 (18:0/20:3)	675523	994552	1.05181e+06	2.65659e+06		197332	394439	285537	706456		88249.5	197219	116570	267015
5	UHPLC/MS/MS Data	PS 38:4 (18:0/20:4)		Peak Area/mg protein	1.76856e+07	3.05233e+07	2.32506e+07	1.84083e+07	1.50994e+07		1.55532e+07	4.27418e+07	4.49233e+06	3.43334e+07		2.95114e+07	4.68821e+07	4.72848e+07	2.99045e+07	50711318	6.87255e+07		1.38256e+07	2.95181e+07	1.55006e+07	1.67987e+07	2.06751e+07	2.18454e+07	2.11014e+07		PS 38:4 (18:0/20:4)	2.09934e+07	2.42802e+07	4.55033e+07	1.9895e+07		6.08845e+06	1.74128e+07	1.46324e+07	5.23141e+06		2.72284e+06	8.70641e+06	5.97364e+06	1.97729e+06
6	UHPLC/MS/MS Data	PS 38:5 (18:0/20:5)		Peak Area/mg protein	1.07782e+06	1.45991e+06	1.22877e+06	1.02971e+06	716008		50814.8	112590	4.51373e+06	6.05456e+06		81017.4	5.42284e+06	4.99081e+06	105818	162450	192855		6.20357e+06	1.31673e+07	6.63127e+06	7.752e+06	10702151	9.47484e+06	1.03675e+07		PS 38:5 (18:0/20:5)	1.10244e+06	2.68292e+06	1.82597e+06	9.18552e+06		273390	3.0689e+06	2.62267e+06	2.48686e+06		122264	1.53445e+06	1.0707e+06	939945
7	UHPLC/MS/MS Data	PS 38:5 (18:1/20:4)		Peak Area/mg protein	527546	777738	574282	556486	454201		3.08497e+06	6.93192e+06	44503.2	52972.7		4.9108e+06	2.57087e+06	2.19597e+06	5.17907e+06	2.39794e+06	1.04493e+07		603295	902582	523807	659787	762918	741790	795228		PS 38:5 (18:1/20:4)	578050	2.52859e+06	4.61732e+06	712773		120669	3.2659e+06	3.14293e+06	126941		53964.6	1.63295e+06	1.2831e+06	47979.1
8	UHPLC/MS/MS Data	PS 38:6 (16:0/22:6)		Peak Area/mg protein	6.14839e+06	8.98592e+06	7.01556e+06	6.98102e+06	4.95621e+06		2.43743e+06	5.10834e+06	3.58361e+06	5.80447e+06		3.39582e+06	5.5122e+06	5.07128e+06	4.23077e+06	5.53816e+06	7.42072e+06		9.75673e+06	1.56999e+07	9.48747e+06	1.07406e+07	1.6853e+07	1.79839e+07	1.82771e+07		PS 38:6 (16:0/22:6)	6.81742e+06	4.23346e+06	5.19482e+06	1.41141e+07		1.4731e+06	1.51454e+06	1.36779e+06	3.96011e+06		658791	757270	558399	1.49678e+06
9	UHPLC/MS/MS Data	PS 40:3 (24:0/16:3)		Peak Area/mg protein	3.98809e+06	4.16461e+06	2.72571e+06	3.27623e+06	2.41813e+06		569007	1.067e+06	621220	1.02627e+06		676925	973100	950095	724271	995424	1.07407e+06		7902.42	540899	545148	9505.78	930226	901533	1.0583e+06		PS 40:3 (24:0/16:3)	3.31455e+06	820873	898980	570502		762892	262083	159934	430055		341176	131042	65293	162546
10	UHPLC/MS/MS Data	PS 40:4 (18:0/22:4)		Peak Area/mg protein	1.08539e+06	1.80817e+06	1.20857e+06	1.36879e+06	848643		917529	3.234e+06	1.39072e+06	2.49065e+06		1.87722e+06	5.36977e+06	6.29074e+06	2.08186e+06	4.15838e+06	6.9863e+06		475285	605825	367004	484377	516705	661767	10293.1		PS 40:4 (18:0/22:4)	1.26391e+06	2.00823e+06	4.46071e+06	445894		358679	1.04979e+06	2.14377e+06	214286		160406	524896	875189	80992.3
11	UHPLC/MS/MS Data	PS 40:5 (18:0/22:5)		Peak Area/mg protein	5.07348e+06	5.97278e+06	3.93428e+06	4.64502e+06	3.26678e+06		1.48654e+06	4.301e+06	2.01194e+06	3.51692e+06		2.55415e+06	6.34287e+06	7.24083e+06	2.80613e+06	5.1538e+06	8.06036e+06		483187	1.14672e+06	912152	493883	1.44693e+06	1.5633e+06	1.06859e+06		PS 40:5 (18:0/22:5)	4.57847e+06	2.8291e+06	5.35969e+06	1.0164e+06		1.04032e+06	1.30509e+06	2.29055e+06	422763		465247	652547	935113	159790
12	UHPLC/MS/MS Data	PS 40:6 (18:0/22:6)		Peak Area/mg protein	2.96059e+07	3.37392e+07	2.68395e+07	2.93237e+07	1.98185e+07		3.76662e+06	1.30533e+07	8.14285e+06	1.43881e+07		6.97039e+06	1.37463e+07	1.20792e+07	9.49596e+06	1.40252e+07	1.87841e+07		3.6703e+07	4.44249e+07	2.87912e+07	3.36387e+07	4.60209e+07	5.72635e+07	5.01429e+07		PS 40:6 (18:0/22:6)	2.78654e+07	9.83772e+06	1.25168e+07	4.24264e+07		5.13475e+06	4.85718e+06	4.07787e+06	9.93727e+06		2.29633e+06	2.42859e+06	1.66478e+06	3.75594e+06
13	UHPLC/MS/MS Data	PS 42:3 (26:0/16:3)		Peak Area/mg protein	331814	6511.16	692521	7327.37	2281.82		1.61784e+06	1.81993e+06	1.58552e+06	2.72981e+06		2.35946e+06	3.47603e+06	2.73517e+06	1.82535e+06	2.86172e+06	2.98341e+06		1378875	592900	1.1857e+06	790297	857733	659517	1.89882e+06		PS 42:3 (26:0/16:3)	208091	1.93828e+06	2.70686e+06	1.05198e+06		305482	537789	564026	467772		136616	268895	230263	176801
1	UHPLC/MS/MS Data	Lyso PC 16:0		Peak Area/mg protein	3.84298e+07	5.38278e+07	5.98076e+07	4.07491e+07	3.24421e+07		5.56827e+07	1.29945e+08	8.67256e+07	1.05924e+08		1.01296e+08	1.27595e+08	1.18759e+08	9.38224e+07	1.21197e+08	1.31672e+08		1.07849e+08	1.09386e+08	9.03078e+07	1.11432e+08	1.2962e+08	1.32857e+08	1.2527e+08		Lyso PC 16:0	4.50513e+07	9.45695e+07	1.15724e+08	1.15246e+08		1.13591e+07	3.13799e+07	1.49817e+07	1.49596e+07		5.07997e+06	1.56899e+07	6.11627e+06	5.6542e+06
2	UHPLC/MS/MS Data	Lyso PC 16:1 w7		Peak Area/mg protein	1.53521e+06	2.01521e+06	1.91352e+06	1.09095e+06	1052320		3.87278e+06	9.38938e+06	5.86432e+06	8.94431e+06		7.45938e+06	7.26899e+06	7472750	6.60852e+06	6.53481e+06	7.97137e+06		5.91036e+06	5.63934e+06	5.46715e+06	6.34643e+06	8.56069e+06	8.48725e+06	6.94481e+06		Lyso PC 16:1 w7	1.52144e+06	7.0177e+06	7.2193e+06	6.76515e+06		448085	2.61773e+06	553449	1.29616e+06		200390	1.30887e+06	225945	489901
3	UHPLC/MS/MS Data	Lyso PC 18:0		Peak Area/mg protein	2.71311e+07	3.2535e+07	4.07666e+07	2.80881e+07	1.92213e+07		3.21783e+07	5.73597e+07	5.07672e+07	5.97887e+07		5.94109e+07	9.3675e+07	8.10223e+07	5.77496e+07	9.14967e+07	9.66127e+07		6.39632e+07	5.25732e+07	4.04565e+07	6.64371e+07	6.87926e+07	7.63895e+07	7.47024e+07		Lyso PC 18:0	2.95484e+07	5.00235e+07	7.99945e+07	6.33307e+07		7.89608e+06	1.24925e+07	1.7408e+07	1.27716e+07		3.53123e+06	6.24623e+06	7.1068e+06	4.82721e+06
4	UHPLC/MS/MS Data	Lyso PC 18:1 w9		Peak Area/mg protein	4.50548e+06	5.84876e+06	6.74887e+06	3.62226e+06	2.68531e+06		1.76333e+07	4.6678e+07	3.61922e+07	3.74786e+07		4.72507e+07	6.14567e+07	5.41229e+07	4.29425e+07	5.18981e+07	5.44531e+07		3.02302e+07	2.49363e+07	2.52035e+07	3.31596e+07	3.67158e+07	3.82635e+07	3.26873e+07		Lyso PC 18:1 w9	4.68214e+06	3.44955e+07	5.20207e+07	3.15995e+07		1.64121e+06	1.21727e+07	6.39618e+06	5.18626e+06		733971	6.08636e+06	2.61123e+06	1.96022e+06
5	UHPLC/MS/MS Data	Lyso PC 18:2 w6		Peak Area/mg protein	922281	44174.6	890506	834783	662351		942300	3.14324e+06	1.68008e+06	1.71638e+06		1.76996e+06	2.25297e+06	2.03984e+06	2.07304e+06	1.76749e+06	2.09637e+06		1.96202e+06	2.03734e+06	2.00655e+06	2.00318e+06	2.35371e+06	2.44861e+06	2.02794e+06		Lyso PC 18:2 w6	670819	1.8705e+06	1.99994e+06	2.11991e+06		364395	920404	193485	195527		162962	460202	78990	73902.1
6	UHPLC/MS/MS Data	Lyso PC 20:0		Peak Area/mg protein	294129	298261	471644	333072	182434		264592	578317	542086	794089		430194	1.33651e+06	1.10396e+06	697438	1.11693e+06	1.3444e+06		904234	553890	418894	1.09559e+06	1.08366e+06	1.22551e+06	1.30477e+06		Lyso PC 20:0	315908	544771	1.0049e+06	940935		103862	217403	366717	336978		46448.5	108701	149712	127366
7	UHPLC/MS/MS Data	Lyso PC 20:1 w9		Peak Area/mg protein	518243	534553	764394	541059	329789		434025	954043	854610	1.17643e+06		680535	1.89107e+06	1.62934e+06	1.05868e+06	1.7017e+06	1.94036e+06		1.24847e+06	835559	626808	1.53088e+06	1.51107e+06	1.71077e+06	1.81424e+06		Lyso PC 20:1 w9	537608	854776	1.48361e+06	1.3254e+06		154124	311098	503774	446854		68926.3	155549	205665	168895
8	UHPLC/MS/MS Data	Lyso PC 20:3 w6		Peak Area/mg protein	1336.34	82778	545.822	926.655	293.939		346504	745415	526393	612183		730859	726222	674382	690398	568391	663699		245555	197296	239620	273936	223784	216979	242291		Lyso PC 20:3 w6	17176.1	557624	675658	234209		36674.6	167122	59113.4	24391.4		16401.4	83560.8	24132.9	9219.09
9	UHPLC/MS/MS Data	Lyso PC 20:4 w6		Peak Area/mg protein	957.207	45492.1	69865.8	386.404	709.091		989.107	138663	126725	126559		113947	188027	160100	102792	119803	109008		708.689	913.978	658.245	47245.1	1417.38	49365.6	48845		Lyso PC 20:4 w6	23482.1	98234.1	132279	21307.7		32385.5	65077.2	34013.7	25431.4		14483.2	32538.6	13886	9612.18
10	UHPLC/MS/MS Data	Lyso PC 22:0		Peak Area/mg protein	89255.6	109110	124116	125641	63338.7		108693	158084	155062	181002		142151	396793	367532	173738	280692	390478		198050	138608	105534	256447	215495	215103	234250		Lyso PC 22:0	102292	150710	291897	194784		26245.2	30311.4	112208	53748.8		11737.2	15155.7	45808.7	20315.1
11	UHPLC/MS/MS Data	Lyso PC 22:4 w6		Peak Area/mg protein	83744.6	113228	101465	62814.6	65764.1		308720	604013	565998	581341		637286	1.0033e+06	968188	607160	906302	1.06819e+06		91292.5	88870	76685.1	92342	102433	123605	92274.8		Lyso PC 22:4 w6	85403.2	515018	865072	95357.3		21970.9	138416	195501	14570.7		9825.69	69207.9	79813.1	5507.19
12	UHPLC/MS/MS Data	Lyso PC 22:5 w3		Peak Area/mg protein	131284	176377	154738	96613.3	83351.7		109440	311396	142783	178622		155161	182589	192800	161694	168386	247682		352247	345343	261265	292074	398805	377673	334034		Lyso PC 22:5 w3	128473	185560	184719	337349		38870	88519	33778.1	47501.6		17383.2	44259.5	13789.8	17953.9
13	UHPLC/MS/MS Data	Lyso PC 22:6 w3		Peak Area/mg protein	8.02018e+06	1.09712e+07	9.43341e+06	5.65892e+06	5.9039e+06		9.64653e+06	2.72044e+07	2.15211e+07	2.30935e+07		2.47116e+07	2.44902e+07	2.35788e+07	2.23308e+07	2.84225e+07	2.85784e+07		4.61877e+07	5.38732e+07	4.16888e+07	5.27614e+07	6.09312e+07	6.77716e+07	5.46932e+07		Lyso PC 22:6 w3	7.99752e+06	2.03664e+07	2.53521e+07	5.39867e+07		2.27801e+06	7.53757e+06	2.57927e+06	8.68259e+06		1.01876e+06	3.76879e+06	1.05298e+06	3.28171e+06
1	UHPLC/MS/MS Data	Lyso PE 16:0		Peak Area/mg protein	141263	264301	268635	218218	133258		269592	459471	487360	540953		386504	1.59051e+06	1.22222e+06	575676	1.2038e+06	1.68403e+06		838935	780619	380803	1.20975e+06	1.01802e+06	1.04079e+06	1.17999e+06		Lyso PE 16:0	205135	439344	1.11046e+06	921273		65096.2	118111	527398	286493		29111.9	59055.6	215309	108284
2	UHPLC/MS/MS Data	Lyso PE 16:1 w7		Peak Area/mg protein	241330	344973	329323	208595	191012		311418	1.27447e+06	659499	862070		541901	511081	593116	688335	580537	749662		456510	625113	566594	547565	851808	859465	802280		Lyso PE 16:1 w7	263046	776863	610772	672762		70231.9	402196	90789.6	163131		31408.7	201098	37064.7	61657.9
3	UHPLC/MS/MS Data	Lyso PE 17:0		Peak Area/mg protein	109029	144401	105372	84404.3	62100.1		119445	525775	238554	297786		207307	295822	231417	272896	344178	337348		228416	318890	259350	318141	471047	530879	421260		Lyso PE 17:0	101061	295390	281495	363998		30642.3	170558	55388.7	112590		13703.7	85278.9	22612.4	42555
4	UHPLC/MS/MS Data	Lyso PE 18:0		Peak Area/mg protein	8.35809e+06	9.99911e+06	7.73551e+06	4.91455e+06	4.06922e+06		9.17499e+06	2.73214e+07	1.23093e+07	1.66418e+07		1.54425e+07	1.73639e+07	1.76764e+07	1.60882e+07	2.12342e+07	2.45126e+07		1.84297e+07	2.33366e+07	1.74111e+07	2.31106e+07	2.66969e+07	3.01221e+07	2.65078e+07		Lyso PE 18:0	7.01529e+06	1.63619e+07	1.87196e+07	2.36593e+07		2.46563e+06	7.92181e+06	3.47771e+06	4.58079e+06		1.10267e+06	3.9609e+06	1.41977e+06	1.73138e+06
5	UHPLC/MS/MS Data	Lyso PE 18:1 w9		Peak Area/mg protein	930946	1.48435e+06	698355	687921	524707		2.75301e+06	6.48036e+06	3.16357e+06	3.83748e+06		4.71038e+06	5.40005e+06	5.85637e+06	3.9826e+06	5.23307e+06	6.53232e+06		4.75497e+06	3.92904e+06	3.32005e+06	4.9825e+06	4.77321e+06	4.93677e+06	4.91577e+06		Lyso PE 18:1 w9	865256	4.05861e+06	5.2858e+06	4.51604e+06		375123	1.67526e+06	885962	639346		167760	837628	361692	241650
6	UHPLC/MS/MS Data	Lyso PE 18:2 w6		Peak Area/mg protein	5.62369e+06	7.24725e+06	3.84253e+06	2.70456e+06	2.97408e+06		1.0944e+06	3922080	1.67832e+06	2.51573e+06		1.4656e+06	1.69749e+06	1.87209e+06	2.1302e+06	1.72647e+06	2.27438e+06		3.38214e+06	4.93302e+06	2.8942e+06	2.96956e+06	4.02988e+06	6.20487e+06	5.5506e+06		Lyso PE 18:2 w6	4.47842e+06	2.30263e+06	1.86104e+06	4.28061e+06		1.92302e+06	1.22714e+06	298211	1.30719e+06		860002	613570	121744	494070
7	UHPLC/MS/MS Data	Lyso PE 20:1 w9		Peak Area/mg protein	680955	1.33646e+06	450908	334669	273947		551222	1.35643e+06	730752	952871		730195	1.09365e+06	1.27201e+06	833539	1.20728e+06	1.70008e+06		541726	706474	578068	570061	602938	854434	956549		Lyso PE 20:1 w9	615388	897818	1.13946e+06	687179		432055	347079	346310	160614		193221	173540	141381	60706.5
8	UHPLC/MS/MS Data	Lyso PE 20:3 w6		Peak Area/mg protein	227193	375992	157571	128404	126468		2.42225e+06	4.47506e+06	2.22819e+06	2.79546e+06		3.04854e+06	3.72368e+06	4.23971e+06	2.72239e+06	3.19959e+06	4.32542e+06		1.08916e+06	784839	862644	1.08464e+06	794569	754812	782836		Lyso PE 20:3 w6	203125	2.98024e+06	3.54322e+06	879071		104877	1.02397e+06	658188	145709		46902.5	511987	268704	55072.7
9	UHPLC/MS/MS Data	Lyso PE 20:4 w6		Peak Area/mg protein	1.80901e+07	2.65676e+07	1.42933e+07	9.9042e+06	1.1729e+07		3.63453e+07	7.03894e+07	3.74129e+07	6.03501e+07		4.34694e+07	6.77155e+07	7.13788e+07	4.4202e+07	6.77491e+07	7.78064e+07		2.06527e+07	2.53569e+07	1.90846e+07	2.28854e+07	2.59587e+07	2.70667e+07	2.46811e+07		Lyso PE 20:4 w6	1.61168e+07	5.11244e+07	6.20535e+07	2.36694e+07		6.60089e+06	1.69576e+07	1.45854e+07	2.92659e+06		2.95201e+06	8.47879e+06	5.95445e+06	1.10615e+06
10	UHPLC/MS/MS Data	Lyso PE 20:5 w3		Peak Area/mg protein	540455	799967	421499	243282	270672		250905	991706	401478	508617		372457	508537	488655	411742	456260	643783		8.38976e+06	1.12499e+07	6.29029e+06	1.33818e+07	1.53918e+07	1.58748e+07	1.95115e+07		Lyso PE 20:5 w3	455175	538176	480239	1.287e+07		227062	320299	94342.1	4.57802e+06		101545	160150	38515	1.73033e+06
11	UHPLC/MS/MS Data	Lyso PE 22:0		Peak Area/mg protein	160425	161574	203310	121953	82058.8		135232	261090	167811	249229		170229	306410	319457	240930	303145	386645		293877	204482	164139	302553	325131	323780	372498		Lyso PE 22:0	145864	203341	287803	283780		45830.3	61486.8	73992.3	73299.9		20495.9	30743.4	30207.2	27704.7
12	UHPLC/MS/MS Data	Lyso PE 22:4 w6		Peak Area/mg protein	1.80126e+06	2.7909e+06	1.46946e+06	718616	783291		8.25401e+06	1.60453e+07	7.93502e+06	9.58594e+06		1.23959e+07	1.93955e+07	1.93451e+07	9.94529e+06	1.56245e+07	2.0538e+07		1.5052e+06	1.40758e+06	994344	1.34984e+06	1.21622e+06	1.39054e+06	1.20345e+06		Lyso PE 22:4 w6	1.51271e+06	1.04551e+07	1.62074e+07	1.29531e+06		848755	3.7948e+06	4.30918e+06	170281		379575	1.8974e+06	1.75921e+06	64360.3
13	UHPLC/MS/MS Data	Lyso PE 22:5 w3		Peak Area/mg protein	3.60341e+06	5.10162e+06	2.84772e+06	1.55077e+06	1.92601e+06		3.02492e+06	8.33191e+06	3.60399e+06	4.89839e+06		3.93115e+06	6.37112e+06	6.34756e+06	4.18814e+06	5.72038e+06	8.83133e+06		8.98509e+06	8.79961e+06	5.76487e+06	9.12957e+06	8.75842e+06	9.33771e+06	8.69254e+06		Lyso PE 22:5 w3	3.00591e+06	4.9648e+06	5.89828e+06	8.4954e+06		1.4193e+06	2.37745e+06	1.78068e+06	1.22528e+06		634729	1.18872e+06	726958	463111
14	UHPLC/MS/MS Data	Lyso PE 22:6 w3		Peak Area/mg protein	1.85235e+07	2.39115e+07	1.39036e+07	1.09721e+07	1.0379e+07		1.87795e+07	5.51738e+07	3.1047e+07	3.58972e+07		3.17703e+07	3.12319e+07	3.405e+07	3.13645e+07	3.72733e+07	4.29154e+07		7.64681e+07	8.62521e+07	6.39887e+07	7.70215e+07	9.67736e+07	1.09771e+08	8.94644e+07		Lyso PE 22:6 w3	1.5538e+07	3.52244e+07	3.47676e+07	8.5677e+07		5.68249e+06	1.51252e+07	4.60969e+06	1.49912e+07		2.54129e+06	7.56262e+06	1.8819e+06	5.66615e+06
1	UHPLC/MS/MS Data	Lyso PI 16:0		Peak Area/mg protein	228391	412133	281246	148943	151083		445561	2.73934e+06	1.15504e+06	1.06692e+06		982840	1.27971e+06	1.17619e+06	1.22028e+06	1.46367e+06	1.37393e+06		1.0058e+06	1.13271e+06	961739	2.02503e+06	2.12631e+06	2.45194e+06	2.5008e+06		Lyso PI 16:0	244359	1.35171e+06	1.24944e+06	1.74348e+06		109051	977480	167093	686733		48769.1	488740	68215.6	259561
2	UHPLC/MS/MS Data	Lyso PI 17:0		Peak Area/mg protein	108873	6415.47	101527	2651.16	1557.58		213177	1.28871e+06	740908	815299		416289	723757	14004	820728	842601	813402		415993	444935	413282	468789	509769	569451	548710		Lyso PI 17:0	44204.8	764523	605130	481561		55770.3	440411	330277	62576.8		24941.2	220206	134835	23651.8
3	UHPLC/MS/MS Data	Lyso PI 18:0		Peak Area/mg protein	7.75391e+06	1.20957e+07	1.0384e+07	5.76756e+06	5.73232e+06		1.13986e+07	3.97778e+07	2.21956e+07	2.35504e+07		2.36997e+07	2.65195e+07	2.57412e+07	2.44324e+07	2.90103e+07	2.8406e+07		2.23649e+07	2.50061e+07	2.31314e+07	2.74372e+07	3.12549e+07	3.67846e+07	32434000		Lyso PI 18:0	8.34669e+06	2.42306e+07	2.63015e+07	2.83447e+07		2.83037e+06	1.17044e+07	2.11618e+06	5.3437e+06		1.26578e+06	5.8522e+06	863925	2.01973e+06
4	UHPLC/MS/MS Data	Lyso PI 18:1 w9		Peak Area/mg protein	12556.3	12500	451167	259964	194623		1.36054e+06	5.87994e+06	3.81094e+06	4.18591e+06		2.69836e+06	2.71221e+06	2.88185e+06	3.48135e+06	3.18939e+06	2.7296e+06		302671	2.10539e+06	2.20853e+06	2.65221e+06	3.32598e+06	4.42177e+06	3.78191e+06		Lyso PI 18:1 w9	186162	3.80934e+06	2.94879e+06	2.6855e+06		184420	1.86421e+06	320222	1.34598e+06		82475.2	932104	130730	508733
5	UHPLC/MS/MS Data	Lyso PI 18:2 w6		Peak Area/mg protein	426860	531827	327727	271840	241364		130769	694385	305572	435204		223916	245566	300619	330390	295590	305935		370244	428578	394550	393611	632682	813265	738824		Lyso PI 18:2 w6	359923	391483	283669	538822		119251	237356	40324.4	185563		53330.5	118678	16462.4	70136.3
6	UHPLC/MS/MS Data	Lyso PI 20:3 w6		Peak Area/mg protein	2800.3	147364	119630	1441.86	1121.21		892466	3.3797e+06	2.54012e+06	2.22051e+06		2.262e+06	2.39766e+06	2.54712e+06	3.02753e+06	2.97226e+06	3.11458e+06		996546	1.16349e+06	1.31945e+06	2.47315e+06	2.11205e+06	2.04115e+06	2.504e+06		Lyso PI 20:3 w6	54471.5	2.2582e+06	2.72019e+06	1.8014e+06		72806.2	1.03343e+06	362619	630592		32559.9	516713	148039	238341
7	UHPLC/MS/MS Data	Lyso PI 20:4 w6		Peak Area/mg protein	5.11801e+06	7.05901e+06	4.5037e+06	2.71793e+06	3.27358e+06		7.46595e+06	3.77682e+07	1.72722e+07	2.20484e+07		1.96213e+07	1.65289e+07	1.79494e+07	2.06568e+07	2.13423e+07	1.99723e+07		1.07848e+07	1.41225e+07	1.32053e+07	1.47882e+07	1.6252e+07	2.30341e+07	19348900		Lyso PI 20:4 w6	4.53445e+06	2.11387e+07	1.93452e+07	1.59337e+07		1.70327e+06	1.26394e+07	1.7921e+06	4.09732e+06		761723	6.31969e+06	731623	1.54864e+06
8	UHPLC/MS/MS Data	Lyso PI 20:5 w3		Peak Area/mg protein	55079.4	83061.6	57120.5	37815.3	34025.5		1694.99	81581.4	51484.8	63990		49217.6	58985.9	50290.5	60710.3	59141.6	61388.9		1474125	1.25915e+06	1.13464e+06	1.64439e+06	2.15249e+06	2.73743e+06	2.36917e+06		Lyso PI 20:5 w3	53420.5	49687.8	56622.5	1.82448e+06		19459.7	34294.3	5409.02	603933		8702.66	17147.1	2208.22	228265
9	UHPLC/MS/MS Data	Lyso PI 22:4 w6		Peak Area/mg protein	153.904	458.533	360.512	143.113	127.273		984.749	226219	93454.7	165981		121701	142311	136658	117452	150153	180212		826.211	1240.14	827.793	111823	110062	126591	102012		Lyso PI 22:4 w6	248.667	121660	141415	64768.7		151.171	97048	22662.1	60121.4		67.6059	48524	9251.77	22723.8
10	UHPLC/MS/MS Data	Lyso PI 22:6 w3		Peak Area/mg protein	127223	197536	116284	98377.4	72578		148961	472806	242031	316325		300278	279235	289974	269783	324149	408203		2.98017e+06	3.3562e+06	2.37601e+06	4.37473e+06	5.63454e+06	6.31175e+06	6.07004e+06		Lyso PI 22:6 w3	122400	295031	311937	4.44335e+06		46811.8	136873	50756.1	1.58941e+06		20934.9	68436.7	20721.1	600741
1	UHPLC/MS/MS Data	Lyso PS 20:4 w6		Peak Area/mg protein	354654	645467	329822	201929	271076		1.22317e+06	3.81218e+06	2.25283e+06	2.46028e+06		2.75389e+06	2.56377e+06	2.85329e+06	2.69064e+06	2.77215e+06	3.40464e+06		472216	924397	815401	600181	741949	643594	597749		Lyso PS 20:4 w6	360590	2.43711e+06	2.83973e+06	685070		169796	1.06442e+06	293129	152402		75935	532208	119669	57602.4
2	UHPLC/MS/MS Data	Lyso PS 22:6 w3		Peak Area/mg protein	641580	934187	589371	405843	393354		440779	1.56211e+06	991755	1.29624e+06		953946	902386	948187	1.11905e+06	997026	1.14094e+06		2.5627e+06	3.03214e+06	2.41928e+06	2.86687e+06	3.92488e+06	4.73234e+06	3.85854e+06		Lyso PS 22:6 w3	592867	1.07272e+06	1.01026e+06	3.34239e+06		220038	481447	97723.4	848537		98404.2	240723	39895.4	320717
1	UHPLC/MS/MS Data	PC 16:0e (14:0e/2:0)		Peak Area/mg protein	1.02366e+06	1.50505e+06	1.36834e+06	1.01007e+06	949503		2.7568e+06	7.39906e+06	6.59177e+06	5.89011e+06		7.99735e+06	1.32971e+07	1.13187e+07	6.64554e+06	9.29666e+06	1.18467e+07		7.22389e+06	6.0953e+06	4.12903e+06	8.65068e+06	7.52297e+06	8.3639e+06	7.37365e+06		PC 16:0e (14:0e/2:0)	1.17132e+06	5.65943e+06	1.0067e+07	7.05134e+06		248597	2.03093e+06	2.51996e+06	1.53246e+06		111176	1.01546e+06	1.02877e+06	579217
2	UHPLC/MS/MS Data	PC 17:0e (14:0e/3:0)		Peak Area/mg protein	496832	726410	531272	403726	360724		1.35304e+06	3.05005e+06	1.87028e+06	2.10366e+06		2.49193e+06	3.4568e+06	3.14981e+06	2.4392e+06	2.96164e+06	3.26129e+06		2.24161e+06	1.89529e+06	1.31901e+06	2.15057e+06	2.19521e+06	2.28925e+06	1.98687e+06		PC 17:0e (14:0e/3:0)	503793	2.09426e+06	2.96011e+06	2.01111e+06		142165	710213	415678	335866		63578.3	355107	169700	126945
3	UHPLC/MS/MS Data	PC 18:0e (16:0e/2:0)		Peak Area/mg protein	280128	347645	427295	353777	234924		554495	54646.2	968264	59369.7		1.30783e+06	2.30031e+06	1.78994e+06	1.18549e+06	1.76903e+06	1.93562e+06		1.60608e+06	997416	666209	1.57657e+06	1.2357e+06	1.23406e+06	1.1441e+06		PC 18:0e (16:0e/2:0)	328754	409193	1.7147e+06	1.20859e+06		73928.9	440361	411331	326016		33062	220180	167925	123223
4	UHPLC/MS/MS Data	PC 18:1e (16:1e/2:0)		Peak Area/mg protein	2.59199e+06	4.17201e+06	3.44669e+06	2.02724e+06	2.12802e+06		1.64159e+07	39365800	2.81551e+07	2.99721e+07		3.49474e+07	4.30024e+07	3.93919e+07	2.96218e+07	3.60218e+07	4.24101e+07		2.87676e+07	2.79677e+07	2.71609e+07	3.20287e+07	3.73731e+07	4.03958e+07	34451500		PC 18:1e (16:1e/2:0)	2.87319e+06	2.84772e+07	3.75659e+07	3.25922e+07		917310	9.42293e+06	5.07357e+06	5.05043e+06		410234	4.71147e+06	2.07128e+06	1.90888e+06
5	UHPLC/MS/MS Data	PC 18:2e (16:2e/2:0)		Peak Area/mg protein	2.14395e+07	2.88987e+07	2.28704e+07	1.10651e+07	1.6167e+07		1.26093e+07	2.52238e+07	1.64836e+07	2.02499e+07		1.52189e+07	2.37556e+07	2.17874e+07	1.73204e+07	1.77446e+07	2.1335e+07		2.10208e+07	3.52485e+07	2.42401e+07	2.79073e+07	4.4187e+07	4.95829e+07	4.09657e+07		PC 18:2e (16:2e/2:0)	2.00881e+07	1.86416e+07	1.9527e+07	3.4736e+07		6.78202e+06	5.38387e+06	3.2516e+06	1.07527e+07		3.03301e+06	2.69193e+06	1.32746e+06	4.06414e+06
6	UHPLC/MS/MS Data	PC 19:1e (14:1e/5:0)		Peak Area/mg protein	795027	1.29363e+06	817816	557389	560527		4.53451e+06	1.09133e+07	5.7258e+06	5.90408e+06		8.36308e+06	9.90851e+06	8.58034e+06	7.77468e+06	7.89098e+06	9.20361e+06		7.15164e+06	6.25683e+06	6.44574e+06	7.00263e+06	8.12111e+06	9.52633e+06	7655900		PC 19:1e (14:1e/5:0)	804878	6.76942e+06	8.6202e+06	7.45145e+06		300042	2.82869e+06	814183	1.11992e+06		134183	1.41434e+06	332389	423288
7	UHPLC/MS/MS Data	PC 20:4e (18:4e/2:0)		Peak Area/mg protein	8.42307e+06	1.20967e+07	1.05764e+07	6.10398e+06	6.66899e+06		2.38587e+07	6.07062e+07	5.16496e+07	5.03523e+07		5.61407e+07	5.78643e+07	6.07208e+07	5.43774e+07	6.08234e+07	6.1783e+07		1.14014e+07	1.45923e+07	1.1521e+07	1.47922e+07	1.53671e+07	1.71955e+07	1.42922e+07		PC 20:4e (18:4e/2:0)	8.77383e+06	4.66417e+07	5.86183e+07	1.41659e+07		2.54815e+06	1.58716e+07	2.96614e+06	2.07562e+06		1.13957e+06	7.9358e+06	1.21092e+06	784510
8	UHPLC/MS/MS Data	PC 20:5e (18:5e/2:0)		Peak Area/mg protein	271872	371315	341783	155466	142831		169254	250764	180908	303052		165379	7855.19	243300	195122	8211.03	191075		5.4874e+06	6.18184e+06	3.92943e+06	5.02972e+06	7.37664e+06	8.39978e+06	5.91478e+06		PC 20:5e (18:5e/2:0)	256654	225994	135157	6.04565e+06		104667	62725.9	101639	1.48163e+06		46808.3	31363	41493.8	560002
9	UHPLC/MS/MS Data	PC 21:3e (18:3e/3:0)		Peak Area/mg protein	198308	280163	261914	143172	95135.2		724746	2.10913e+06	1.1918e+06	1.45641e+06		1.5879e+06	1.81388e+06	1.50584e+06	1.41168e+06	1.80458e+06	1.62981e+06		908707	868658	921239	1.19241e+06	1.18962e+06	1.1556e+06	1.31384e+06		PC 21:3e (18:3e/3:0)	195738	1.37052e+06	1.62562e+06	1.07858e+06		78098.8	577893	160640	175237		34926.8	288946	65580.9	66233.5
10	UHPLC/MS/MS Data	PC 21:4e (18:4e/3:0)		Peak Area/mg protein	1.70515e+06	2.59914e+06	1.84542e+06	1.31887e+06	1.24247e+06		4.8369e+06	9.53165e+06	6.21108e+06	8.69874e+06		7.47312e+06	7.20645e+06	9.80836e+06	7.46912e+06	8.75207e+06	1.0033e+07		2.05327e+06	2.4913e+06	1.92317e+06	2.00486e+06	2.55083e+06	2.8692e+06	2.76562e+06		PC 21:4e (18:4e/3:0)	1.74221e+06	7.31959e+06	8.45702e+06	2.37975e+06		542060	2.17469e+06	1.25736e+06	384224		242417	1.08734e+06	513317	145223
11	UHPLC/MS/MS Data	PC 32:0e (14:0e/18:0)		Peak Area/mg protein	2.48409e+06	3.53896e+06	3.33137e+06	3.20653e+06	2.33065e+06		3.3516e+06	8.43892e+06	7.52937e+06	4.56854e+06		5.16438e+06	1.2932e+07	1.29064e+07	6.31454e+06	1.43416e+07	1.56955e+07		5.94079e+06	6.33456e+06	3.16992e+06	1.24776e+07	7.46353e+06	7.06347e+06	9.97942e+06		PC 32:0e (14:0e/18:0)	2.97832e+06	5.97211e+06	1.12257e+07	7.4899e+06		537302	2.40467e+06	4.38823e+06	2.99037e+06		240289	1.20233e+06	1.79149e+06	1.13026e+06
12	UHPLC/MS/MS Data	PC 34:0e (14:0e/20:0)		Peak Area/mg protein	340896	622505	533487	497692	296677		536508	1.43278e+06	1.8747e+06	917836		822173	2.52313e+06	3.099e+06	1.31462e+06	4.95662e+06	5.64882e+06		874003	880556	422071	2.35511e+06	954578	1.10123e+06	2.36241e+06		PC 34:0e (14:0e/20:0)	458251	1.19045e+06	3.06073e+06	1.27857e+06		136083	585627	1.93097e+06	766566		60858	292813	788313	289735
13	UHPLC/MS/MS Data	PC 34:1e (14:0e/20:1)		Peak Area/mg protein	4.39618e+06	5.32861e+06	5.37283e+06	4.59428e+06	3.37016e+06		6.70164e+06	1.03753e+07	9.66694e+06	9.71282e+06		1.16718e+07	2.95948e+07	2.54257e+07	1.11203e+07	2.14728e+07	2.8862e+07		1.07721e+07	1.1165e+07	6.17184e+06	1.4899e+07	12476599	1.15714e+07	1.55305e+07		PC 34:1e (14:0e/20:1)	4.61241e+06	9.11418e+06	2.13579e+07	1.17981e+07		818757	1.6406e+06	8.23827e+06	3.0867e+06		366159	820300	3.36326e+06	1.16666e+06
14	UHPLC/MS/MS Data	PC 34:2e (14:0e/20:2)		Peak Area/mg protein	940454	1.28241e+06	1.18857e+06	1.35373e+06	828282		1.0148e+06	2.54067e+06	1.30924e+06	1.26344e+06		1.25686e+06	3.28335e+06	3.05015e+06	1.32889e+06	13209.2	2.5855e+06		1.79458e+06	2.35042e+06	1.02977e+06	1.55822e+06	2.64911e+06	2.27719e+06	23682.8		PC 34:2e (14:0e/20:2)	1.11869e+06	1.53204e+06	1.91966e+06	1.669e+06		225296	684749	1.26522e+06	907247		100756	342375	516522	342907
15	UHPLC/MS/MS Data	PC 36:4e (14:0e/22:4)		Peak Area/mg protein	3.94343e+06	5.51626e+06	5.54985e+06	5.29836e+06	3.83858e+06		6.80454e+06	1.40726e+07	9.79935e+06	1.1207e+07		9.46479e+06	1.76327e+07	1.84036e+07	299569	1.63266e+07	2.63315e+07		8.35805e+06	1.05809e+07	6.42792e+06	1.05777e+07	1.17999e+07	140428	143738		PC 36:4e (14:0e/22:4)	4.8293e+06	1.04709e+07	1.47431e+07	6.86124e+06		862757	3.02255e+06	8.88846e+06	4.91191e+06		385836	1.51128e+06	3.6287e+06	1.85653e+06
16	UHPLC/MS/MS Data	PC 38:4e (14:0e/24:4)		Peak Area/mg protein	897466	1.52283e+06	1.50077e+06	1.52324e+06	1.00717e+06		1.00488e+06	2.47108e+06	2.16504e+06	2.88768e+06		1.71168e+06	4.07793e+06	4.20583e+06	2.23075e+06	5.21476e+06	7.12177e+06		876258	1.26812e+06	8580.45	1.62176e+06	1.55073e+06	1.24598e+06	1.91991e+06		PC 38:4e (14:0e/24:4)	1.2903e+06	2.13217e+06	4.09379e+06	1.21305e+06		311090	807775	1.97906e+06	625701		139124	403888	807949	236493
17	UHPLC/MS/MS Data	PC 38:5e (16:0e/22:5)		Peak Area/mg protein	95270.3	8.4464e+06	6.69978e+06	6.45198e+06	4.99865e+06		1.00199e+07	1.67463e+07	1.06308e+07	1.20606e+07		1.26855e+07	2.10189e+07	2.13049e+07	1.0921e+07	1.72174e+07	2.59e+07		7.44861e+06	9.06994e+06	5.74753e+06	7.20226e+06	8.51484e+06	7.40797e+06	7.02008e+06		PC 38:5e (16:0e/22:5)	5.33841e+06	1.23644e+07	1.81746e+07	7.48732e+06		3.17643e+06	3.04387e+06	5.6786e+06	1.07197e+06		1.42054e+06	1.52194e+06	2.31828e+06	405166
18	UHPLC/MS/MS Data	PC 38:6e (16:0e/22:6)		Peak Area/mg protein	59744.7	2.72595e+06	1.68967e+06	1.96694e+06	1.93104e+06		53019.6	2.46342e+06	51126.6	62689.1		41061.8	96070.5	92968.3	52188.6	61613.7	4.17562e+06		7.08126e+06	7.90114e+06	4.45697e+06	8.37527e+06	1.06898e+07	9.38813e+06	9.96481e+06		PC 38:6e (16:0e/22:6)	1.67467e+06	657563	753254	8.26534e+06		982922	1.20391e+06	1.67676e+06	2.08477e+06		439576	601957	684532	787967
19	UHPLC/MS/MS Data	PC 40:6e (18:0e/22:6)		Peak Area/mg protein	1.11211e+06	1.73284e+06	1.31366e+06	1.60014e+06	964756		472622	802150	622400	777139		545924	836329	938409	663487	844829	1.18614e+06		1.86771e+06	2.62368e+06	1.2817e+06	2.15732e+06	2.56916e+06	2.46319e+06	2.12616e+06		PC 40:6e (18:0e/22:6)	1.3447e+06	668578	835854	2.15556e+06		322226	152925	222293	471203		144104	76462.5	90750.6	178098
20	UHPLC/MS/MS Data	PC 40:7e (18:1e/22:6)		Peak Area/mg protein	46989.5	2.79451e+06	2.10383e+06	2.50825e+06	1.90892e+06		1.54161e+06	1.99302e+06	2.7236e+06	2.83958e+06		2.74364e+06	3.25067e+06	3.72589e+06	2.64567e+06	3.20435e+06	3.87575e+06		5.03259e+06	6.49033e+06	3.32853e+06	5.41178e+06	6.31204e+06	5.45947e+06	4.77099e+06		PC 40:7e (18:1e/22:6)	1.8725e+06	2.27445e+06	3.241e+06	5.25796e+06		1.07722e+06	615730	498246	1.05709e+06		481747	307865	203408	399544
1	UHPLC/MS/MS Data	PE 20:1e (14:1e/6:0)		Peak Area/mg protein	735479	1.13763e+06	825499	584637	532131		3.92614e+06	1.06049e+07	6.03153e+06	7241250		8.57709e+06	9.68411e+06	9.73285e+06	6.78576e+06	8.8557e+06	9.95059e+06		6.58816e+06	6.79381e+06	6.89683e+06	7.83231e+06	9.28351e+06	8.79072e+06	8.42423e+06		PE 20:1e (14:1e/6:0)	763075	6.95095e+06	8.93101e+06	7.80137e+06		239856	2.79466e+06	1.18175e+06	1.07003e+06		107267	1.39733e+06	482447	404432
2	UHPLC/MS/MS Data	PE 22:4e (20:4e/2:0)		Peak Area/mg protein	1.55278e+06	2.29737e+06	2.18846e+06	1.35174e+06	1.331e+06		3.93452e+06	9784600	6.72031e+06	7.03642e+06		7.49501e+06	7.6916e+06	1.02624e+07	7.78272e+06	9.04829e+06	9.28529e+06		1.51631e+06	2.17936e+06	1.48673e+06	1.86437e+06	2.03707e+06	2.36021e+06	1.96475e+06		PE 22:4e (20:4e/2:0)	1.74427e+06	6.86896e+06	8.59421e+06	1.91554e+06		464964	2.39179e+06	1.10887e+06	324140		207938	1.1959e+06	452694	122514
3	UHPLC/MS/MS Data	PE 24:6e (22:6e/2:0)		Peak Area/mg protein	2.08592e+06	2.79276e+06	2.3422e+06	1.61094e+06	1.43117e+06		2.60476e+06	7.95027e+06	5.06907e+06	5.61639e+06		5.43402e+06	5.39491e+06	5.2828e+06	5.47686e+06	6.31051e+06	6.10612e+06		8.43673e+06	9.75949e+06	8.56548e+06	9.29614e+06	1.19288e+07	1.28367e+07	1.05959e+07		PE 24:6e (22:6e/2:0)	2.0526e+06	5.31012e+06	5.66754e+06	1.02027e+07		550920	2.19403e+06	428721	1.67777e+06		246379	1.09701e+06	175025	634136
4	UHPLC/MS/MS Data	PE 33:0e (14:0e/19:0)		Peak Area/mg protein	93422.4	158692	114614	153193	110101		406318	520647	600583	432840		348481	928223	823358	502275	554850	761404		451376	522322	252242	626845	527559	478743	514116		PE 33:0e (14:0e/19:0)	126005	490097	653098	481886		28512.9	88388.8	219820	115073		12751.4	44194.4	89741.2	43493.4
5	UHPLC/MS/MS Data	PE 34:0e (18:0e/16:0)		Peak Area/mg protein	174454	8724.08	225403	244434	165482		19747.3	670029	578097	517182		580446	1.22768e+06	1.01133e+06	601315	804806	965277		636679	14802.9	348092	624842	679553	625716	651130		PE 34:0e (18:0e/16:0)	163699	446264	865143	511545		92819.2	291203	251845	245869		41510	145601	102815	92929.8
6	UHPLC/MS/MS Data	PE 34:1e (16:0e/18:1)		Peak Area/mg protein	788161	1.0699e+06	768709	1.08765e+06	577728		1.55732e+06	1.42912e+06	445439	597216		827239	998877	1.48915e+06	575574	937751	1.51331e+06		1.94957e+06	1.56508e+06	1.20756e+06	914556	930359	782836	752139		PE 34:1e (16:0e/18:1)	858431	1.00727e+06	1.05698e+06	1.15744e+06		217397	566953	373400	449314		97222.8	283477	152440	169825
7	UHPLC/MS/MS Data	PE 34:3e (16:1e/18:2)		Peak Area/mg protein	966807	1.49024e+06	1.14017e+06	1.30657e+06	680504		103733	1943.59	1538.72	118963		1498.34	282147	225111	89647.9	234625	504115		303829	329375	150493	273271	319394	320584	449234		PE 34:3e (16:1e/18:2)	1.11686e+06	56544.7	222857	306597		311796	63586.6	172922	88232.9		139440	31793.3	70594.9	33348.9
8	UHPLC/MS/MS Data	PE 36:1e (18:0e/18:1)		Peak Area/mg protein	836849	1.46318e+06	753927	866224	437767		595368	1.17246e+06	563159	749066		498192	901222	1.29857e+06	825083	1.15435e+06	1.93514e+06		827814	929922	599696	822147	729307	872724	801610		PE 36:1e (18:0e/18:1)	871590	770014	1.10209e+06	797603		371908	280295	493372	106860		166322	140147	201418	40389.3
9	UHPLC/MS/MS Data	PE 36:2e (18:0e/18:2)		Peak Area/mg protein	1.24686e+06	2.14428e+06	1.0475e+06	1.1085e+06	572668		838935	1.10764e+06	83783.3	452062		571789	412284	466246	742359	523307	768332		579728	1.11881e+06	666902	869008	933048	948310	492448		PE 36:2e (18:0e/18:2)	1.22396e+06	620605	580719	801179		573620	447756	145723	226169		256531	223878	59491.3	85483.7
10	UHPLC/MS/MS Data	PE 36:4e (16:0e/20:4)		Peak Area/mg protein	644654	919689	635194	1.75995e+06	503232		762396	1.50627e+06	631480	782088		1.06188e+06	1.49128e+06	2.36897e+06	830273	1.43693e+06	2.33758e+06		884709	637845	421856	921285	707093	662338	611873		PE 36:4e (16:0e/20:4)	892543	920559	1.58782e+06	692428		508027	396155	641078	169875		227197	198077	261719	64206.8
11	UHPLC/MS/MS Data	PE 36:5e (16:1e/20:4)		Peak Area/mg protein	7.07291e+06	9.17197e+06	8.13131e+06	9.19628e+06	4.88405e+06		2.53178e+06	1.89653e+06	1.00048e+06	2.06688e+06		1.13059e+06	7.05823e+06	5.05931e+06	1.35272e+06	6.49847e+06	1.1045e+07		1.76712e+06	1.92671e+06	648271	1.74495e+06	2.13447e+06	2.09465e+06	2.97842e+06		PE 36:5e (16:1e/20:4)	7.6913e+06	1.87392e+06	5.35738e+06	1.89923e+06		1.79681e+06	641206	3.75594e+06	691025		803556	320603	1.53336e+06	261183
12	UHPLC/MS/MS Data	PE 38:4e (16:0e/22:4)		Peak Area/mg protein	147546	244469	5043.8	5817.53	4342.42		9272.33	1.17978e+06	447385	293641		735008	794501	868483	596136	605526	920579		2083.33	90762.2	1808.51	222516	1071.94	2503.35	796.552		PE 38:4e (16:0e/22:4)	81443.9	482520	753372	45934.6		110054	499015	134029	84653.3		49217.8	249508	54717.1	31995.9
13	UHPLC/MS/MS Data	PE 38:5e (16:0e/22:5)		Peak Area/mg protein	821098	1.15269e+06	878354	773989	535122		974749	2.77651e+06	970660	1.59893e+06		1.67915e+06	2.53112e+06	3.40438e+06	1.5436e+06	1.69469e+06	2.72735e+06		1.82098e+06	1.66312e+06	1.00469e+06	1.55245e+06	1.49801e+06	1316250	1.23787e+06		PE 38:5e (16:0e/22:5)	832251	1.58021e+06	2.26338e+06	1.44191e+06		221706	850415	744532	275856		99149.9	425208	303954	104264
14	UHPLC/MS/MS Data	PE 38:5e (18:1e/20:4)		Peak Area/mg protein	1.50372e+07	2.1726e+07	1.75777e+07	2.25173e+07	1.36073e+07		5.65432e+06	2.05608e+06	773188	2.28957e+06		1.01531e+06	4.78142e+06	5.84681e+06	1.25158e+06	4.59028e+06	7.97458e+06		2.54518e+06	2.5127e+06	841127	685776	1.20941e+06	1.40558e+06	1.2444e+06		PE 38:5e (18:1e/20:4)	1.80931e+07	2.69329e+06	4.24333e+06	1.49203e+06		3.95279e+06	2.08355e+06	2.69347e+06	749810		1.76774e+06	1.04177e+06	1.09961e+06	283401
15	UHPLC/MS/MS Data	PE 38:6e (18:2e/20:4)		Peak Area/mg protein	5.83218e+06	7.21496e+06	7.15164e+06	7.38408e+06	3.96055e+06		2.85035e+06	2.02929e+06	1.1939e+06	2.23639e+06		1.55824e+06	8.0857e+06	5.97416e+06	1.7519e+06	7.06755e+06	1.14297e+07		2.5886e+06	2.79232e+06	1.2729e+06	2.48134e+06	2.84956e+06	3.07586e+06	3.89638e+06		PE 38:6e (18:2e/20:4)	6.30868e+06	2.07749e+06	5.97788e+06	2.70814e+06		1.45165e+06	684497	3.81432e+06	785269		649198	342248	1.55719e+06	296804
16	UHPLC/MS/MS Data	PE 38:7e (16:1e/22:6)		Peak Area/mg protein	3.04628e+06	3.40651e+06	3.30938e+06	4.3993e+06	2.14932e+06		828051	493271	327927	524059		374161	1.76192e+06	1.25959e+06	326852	1.58308e+06	2.8921e+06		4.73965e+06	4.02907e+06	1.37167e+06	3.71272e+06	4.56423e+06	4.64535e+06	6.22316e+06		PE 38:7e (16:1e/22:6)	3.26216e+06	543327	1.36628e+06	4.18369e+06		806408	208440	959973	1.47081e+06		360637	104220	391907	555913
17	UHPLC/MS/MS Data	PE 40:4e (18:0e/22:4)		Peak Area/mg protein	682494	1.13911e+06	832104	702835	604102		1.12842e+06	777763	291303	410139		343707	598019	1.09167e+06	403678	752165	1.19202e+06		3019.94	1584.23	2047.87	1633.5	1335.47	1234.94	951.724		PE 40:4e (18:0e/22:4)	792129	651905	730209	1686.81		210559	379204	351534	681.781		94165	189602	143513	257.689
18	UHPLC/MS/MS Data	PE 40:5e (18:0e/22:5)		Peak Area/mg protein	3.72877e+06	4.54562e+06	4.14149e+06	5.10213e+06	2.75342e+06		1.95647e+06	1.27103e+06	619230	934198		717868	2.35993e+06	2.35125e+06	730530	2.33524e+06	4.08411e+06		4.74267e+06	4.03065e+06	1.37372e+06	3.71435e+06	4.56556e+06	4.64659e+06	6.22411e+06		PE 40:5e (18:0e/22:5)	4.05429e+06	1.19523e+06	2.09649e+06	4.18538e+06		886738	573045	1.25765e+06	1.47057e+06		396561	286522	513433	555824
19	UHPLC/MS/MS Data	PE 40:6e (18:1e/22:5)		Peak Area/mg protein	5.35955e+06	7.20447e+06	6.36872e+06	7.14029e+06	4.2644e+06		1.22583e+06	487609	149435	419036		198087	685139	1.19821e+06	268329	658736	1.6501e+06		2.12388e+06	1.51622e+06	693154	441737	677662	850237	654932		PE 40:6e (18:1e/22:5)	6.06749e+06	570477	776434	993975		1.25366e+06	460638	557859	602849		560655	230319	227745	227855
20	UHPLC/MS/MS Data	PE 40:7e (18:1e/22:6)		Peak Area/mg protein	2.70927e+06	3.72611e+06	3.08336e+06	4.12619e+06	1.87196e+06		554802	398317	265498	502155		221929	1.14864e+06	945206	342026	1.50509e+06	2.55628e+06		1.94746e+06	2.19319e+06	668276	1.73729e+06	2.29482e+06	2.4921e+06	3.27225e+06		PE 40:7e (18:1e/22:6)	3.10338e+06	430193	1.11986e+06	2.08648e+06		881199	127601	854908	793509		394084	63800.7	349015	299918
21	UHPLC/MS/MS Data	PE 40:7e (18:2e/22:5)		Peak Area/mg protein	1.11745e+06	1.51825e+06	1.31981e+06	1.4036e+06	782252		398169	370699	192327	306828		203977	942527	683210	234246	808564	1.4598e+06		1.11479e+06	1.10505e+06	129045	984539	996590	1.09677e+06	1.30392e+06		PE 40:7e (18:2e/22:5)	1.22827e+06	317006	722053	961529		289145	91504	470792	381750		129310	45752	192200	144288
22	UHPLC/MS/MS Data	PE 40:8e (18:2e/22:6)		Peak Area/mg protein	1.11272e+06	1.29024e+06	1.31398e+06	1.45135e+06	761911		742553	11000	219069	422958		330564	1.47238e+06	1.06675e+06	301411	1.31035e+06	2.34414e+06		2.156e+06	1.8521e+06	678708	1.50313e+06	2.10385e+06	1.52969e+06	2.18538e+06		PE 40:8e (18:2e/22:6)	1.18604e+06	348895	1.1376e+06	1.71555e+06		265930	311705	768532	538340		118928	155853	313752	203473
1	UHPLC/MS/MS Data	SM d33:1 (d14:0/19:1)		Peak Area/mg protein	826003	1.25054e+06	1.15866e+06	973526	603798		2.07129e+06	4.67649e+06	4.60606e+06	4.42103e+06		3.21134e+06	1.01675e+07	9.02774e+06	4.6736e+06	7.25617e+06	1.06481e+07		4.62001e+06	4.4392e+06	2.01971e+06	5.39849e+06	5.6801e+06	6.74885e+06	5.08437e+06		SM d33:1 (d14:0/19:1)	962505	3.94372e+06	7.49741e+06	4.85582e+06		259261	1.25292e+06	3.02657e+06	1.46529e+06		115945	626462	1.23559e+06	553826
2	UHPLC/MS/MS Data	SM d34:0 (d14:0/20:0)		Peak Area/mg protein	754769	606005	541085	595418	548796		1.2699e+06	1.60767e+06	1.61424e+06	899278		1.45108e+06	2.71089e+06	2.2738e+06	1.13704e+06	1.72201e+06	1.72204e+06		2.17755e+06	1.14244e+06	942182	2.27031e+06	1.31635e+06	1.30479e+06	1.25192e+06		SM d34:0 (d14:0/20:0)	609215	1.34777e+06	1.83614e+06	1.48651e+06		86137.7	339493	569173	520186		38522	169746	232364	196612
3	UHPLC/MS/MS Data	SM d34:1 (d14:0/20:1)		Peak Area/mg protein	1.47293e+07	2.06279e+07	2.21691e+07	1.85366e+07	1.23924e+07		2.95372e+07	4.71927e+07	4.93962e+07	3.97962e+07		3.9644e+07	9.29525e+07	8.73752e+07	4.23011e+07	7.51192e+07	7.75267e+07		5.29293e+07	4.52318e+07	3.43085e+07	6.26239e+07	5.13594e+07	4.73044e+07	5.73476e+07		SM d34:1 (d14:0/20:1)	1.76911e+07	4.14806e+07	6.91531e+07	5.01579e+07		4.0694e+06	8.95857e+06	2.27859e+07	9.12714e+06		1.81989e+06	4.47928e+06	9.30231e+06	3.44974e+06
4	UHPLC/MS/MS Data	SM d34:2 (d16:0/18:2)		Peak Area/mg protein	577779	870862	1.32169e+06	797210	554341		856750	1.79181e+06	2.05962e+06	2.16853e+06		1.58816e+06	6.23583e+06	4.87863e+06	2.41329e+06	4.03118e+06	5.95988e+06		2.78633e+06	2.0403e+06	1.16529e+06	4.14275e+06	3.16641e+06	3.47885e+06	3.65093e+06		SM d34:2 (d16:0/18:2)	824377	1.71918e+06	4.18449e+06	2.91869e+06		309819	596344	1.8838e+06	1.02251e+06		138555	298172	769056	386471
5	UHPLC/MS/MS Data	SM d35:1 (d14:0/21:1)		Peak Area/mg protein	2.44709e+06	3.54437e+06	2.26478e+06	2.03141e+06	1.34594e+06		6.34212e+06	8.16966e+06	6.0709e+06	6.50792e+06		7.05342e+06	1.54246e+07	1.12293e+07	6.67218e+06	1.06599e+07	1.18175e+07		6.33075e+06	4.01881e+06	3.97786e+06	5.85089e+06	6.35911e+06	6.01878e+06	6.26521e+06		SM d35:1 (d14:0/21:1)	2.32672e+06	6.77265e+06	1.04762e+07	5.54592e+06		798458	948598	3.25801e+06	1.07254e+06		357081	474299	1.33008e+06	405383
6	UHPLC/MS/MS Data	SM d36:1 (d14:1/22:0)		Peak Area/mg protein	2.02619e+06	2.65477e+06	2.5837e+06	3.09223e+06	1.99556e+06		3.38872e+06	8.46989e+06	6.71941e+06	4.01522e+06		4.87967e+06	1.12519e+07	1.39441e+07	5.02826e+06	1.21745e+07	1.38779e+07		6.73137e+06	4.92391e+06	3.7238e+06	1.04627e+07	5.50503e+06	5.31454e+06	6.11611e+06		SM d36:1 (d14:1/22:0)	2.47049e+06	5.64831e+06	1.01927e+07	6.11107e+06		462683	2.37215e+06	4.18576e+06	2.13822e+06		206918	1.18608e+06	1.70883e+06	808171
7	UHPLC/MS/MS Data	SM d36:2 (d14:0/22:2)		Peak Area/mg protein	295083	303511	262186	337968	282350		1.0736e+06	1.86332e+06	1.34336e+06	1.03355e+06		1.10296e+06	2.06382e+06	2.37553e+06	1.14735e+06	1.40453e+06	1.77286e+06		1.00643e+06	805354	551310	1.10345e+06	859265	850961	687426		SM d36:2 (d14:0/22:2)	296219	1.32846e+06	1.64451e+06	837743		28053.8	382197	514727	185015		12546.1	191098	210137	69929.2
8	UHPLC/MS/MS Data	SM d38:1 (d14:1/24:0)		Peak Area/mg protein	1.43876e+06	2.03372e+06	2.40401e+06	1.9116e+06	1.34464e+06		1.28102e+06	7.69477e+06	5.60761e+06	4.91463e+06		2.77539e+06	7.86801e+06	8.71245e+06	4.62988e+06	1.69432e+07	1.80283e+07		3.43724e+06	4.28897e+06	2.5429e+06	1.64237e+07	8.18101e+06	8.28022e+06	1.57083e+07		SM d38:1 (d14:1/24:0)	1.82654e+06	4.87451e+06	9.8262e+06	8.40891e+06		437674	2.67121e+06	6.32006e+06	5.68167e+06		195734	1.33561e+06	2.58015e+06	2.14747e+06
9	UHPLC/MS/MS Data	SM d39:1 (d14:0/25:1)		Peak Area/mg protein	2.77643e+06	3.50173e+06	2.49224e+06	2.77201e+06	2.21767e+06		2.85008e+06	2.97621e+06	1.29216e+06	1.94313e+06		1.81449e+06	2.14543e+06	3.36165e+06	1.80081e+06	1.42746e+06	1.80575e+06		4.83699e+06	4.52853e+06	4.39852e+06	2.27708e+06	3.07702e+06	3.73236e+06	2.41729e+06		SM d39:1 (d14:0/25:1)	2.75202e+06	2.26539e+06	2.05926e+06	3.60969e+06		478560	795438	677318	1.03837e+06		214019	397719	276514	392466
10	UHPLC/MS/MS Data	SM d39:1 (d14:1/25:0)		Peak Area/mg protein	1.13863e+06	1.47832e+06	1.72183e+06	1.28431e+06	788527		624875	2.74063e+06	1.97956e+06	1.93507e+06		712037	1.83509e+06	2.95101e+06	1.77837e+06	5.67584e+06	5.8778e+06		1.51083e+06	1.62121e+06	1.1282e+06	4.96785e+06	3.25214e+06	4.55908e+06	9.06967e+06		SM d39:1 (d14:1/25:0)	1.28232e+06	1.82004e+06	3.13836e+06	3.72985e+06		352160	878367	2.16396e+06	2.80182e+06		157491	439183	883433	1.05899e+06
11	UHPLC/MS/MS Data	SM d40:1 (d14:1/26:0)		Peak Area/mg protein	1.5507e+07	1.52329e+07	1.76398e+07	1.66164e+07	1.06011e+07		6.74587e+06	3.04368e+07	2.14746e+07	1.7415e+07		9.29767e+06	1.92549e+07	2.44622e+07	1.73929e+07	5.0103e+07	5.18441e+07		1.57237e+07	1.69719e+07	1.24226e+07	4.78413e+07	2.61969e+07	3.42589e+07	6.91389e+07		SM d40:1 (d14:1/26:0)	1.51195e+07	1.90181e+07	2.87258e+07	3.17935e+07		2.70053e+06	9.82512e+06	1.79176e+07	2.05862e+07		1.20771e+06	4.91256e+06	7.31483e+06	7.78086e+06
12	UHPLC/MS/MS Data	SM d40:2 (d14:0/26:2)		Peak Area/mg protein	85630	100984	173795	99822	88244.6		120768	1723.08	135867	154721		127789	217343	229533	129015	66284.5	116213		146440	88201	105676	84130.2	98257.2	2004.69	67614.8		SM d40:2 (d14:0/26:2)	109695	103270	147696	84617.7		36474.1	69108.1	63106.8	43929		16311.7	34554.1	25763.3	16603.6
13	UHPLC/MS/MS Data	SM d41:1 (d14:0/27:1)		Peak Area/mg protein	6.541e+06	6.64621e+06	6.60188e+06	5.95031e+06	3.97466e+06		3.48431e+06	6.62833e+06	3.68572e+06	6.12537e+06		3.42173e+06	5.71824e+06	6.2609e+06	5.71258e+06	5.61217e+06	7.52618e+06		6.05496e+06	6.26846e+06	5.1694e+06	7.91817e+06	9.60457e+06	1.0622e+07	1.1783e+07		SM d41:1 (d14:0/27:1)	5.94281e+06	4.98093e+06	5.70864e+06	8.20293e+06		1.13585e+06	1.62697e+06	1.33025e+06	2.52562e+06		507969	813487	543072	954593
14	UHPLC/MS/MS Data	SM d41:1 (d14:1/27:0)		Peak Area/mg protein	3.19138e+06	4.72063e+06	5.22965e+06	4.36138e+06	2.82803e+06		3.19668e+06	1.47442e+07	1.34889e+07	9.45544e+06		4.43139e+06	1.58148e+07	1.98778e+07	1.02194e+07	3.46516e+07	3.49197e+07		7.70206e+06	5.74345e+06	4.39667e+06	2.46992e+07	1.0537e+07	1.34844e+07	3.08159e+07		SM d41:1 (d14:1/27:0)	4.06622e+06	1.02213e+07	1.99858e+07	1.39112e+07		1.02071e+06	5.19826e+06	1.25924e+07	1.00789e+07		456475	2.59913e+06	5.14081e+06	3.80947e+06
15	UHPLC/MS/MS Data	SM d41:2 (d14:1/27:1)		Peak Area/mg protein	1.17501e+06	2.00829e+06	1.95674e+06	1.58841e+06	922017		1.42465e+06	3.33865e+06	2.89252e+06	3.39008e+06		2.06371e+06	4.26463e+06	5.36041e+06	2.87019e+06	7.11568e+06	7.74639e+06		2.10128e+06	2.31797e+06	1.56421e+06	3.38017e+06	2.71331e+06	3.28656e+06	5.67062e+06		SM d41:2 (d14:1/27:1)	1.53009e+06	2.76148e+06	4.9035e+06	3.00488e+06		476954	918793	2.27119e+06	1.3401e+06		213300	459396	927209	506511
16	UHPLC/MS/MS Data	SM d42:1 (d14:1/28:0)		Peak Area/mg protein	7.76237e+06	1.00721e+07	1.1822e+07	9.95264e+06	6.02686e+06		3.20006e+06	1.58401e+07	1.67033e+07	8.57988e+06		5.53552e+06	2.04079e+07	2.35648e+07	1.12096e+07	4.45406e+07	4.4039e+07		9.47604e+06	7.19863e+06	4.656e+06	3.67592e+07	1.29229e+07	1.70457e+07	4.34029e+07		SM d42:1 (d14:1/28:0)	9.12719e+06	1.10808e+07	2.48829e+07	1.87802e+07		2.25339e+06	6.39333e+06	1.63488e+07	1.52043e+07		1.00775e+06	3.19667e+06	6.67439e+06	5.7467e+06
17	UHPLC/MS/MS Data	SM d42:2 (d14:1/28:1)		Peak Area/mg protein	1.43373e+07	2.01284e+07	1.78062e+07	1.9586e+07	1.14597e+07		1.56832e+07	2.47918e+07	2.53306e+07	2.33394e+07		2.60731e+07	5.32291e+07	4.37464e+07	2.41858e+07	5.76596e+07	5.94949e+07		2.50924e+07	2.15585e+07	1.4729e+07	3.09755e+07	2.25214e+07	2.38067e+07	2.92658e+07		SM d42:2 (d14:1/28:1)	1.66635e+07	2.22863e+07	4.40648e+07	2.39927e+07		3.6859e+06	4.48163e+06	1.5658e+07	5.34968e+06		1.64839e+06	2.24082e+06	6.39236e+06	2.02199e+06
18	UHPLC/MS/MS Data	SM d42:3 (d14:2/28:1)		Peak Area/mg protein	476641	580953	1.06934e+06	725209	430104		569243	839212	972898	784093		921784	2.42244e+06	1.58396e+06	922229	1.16554e+06	1.34046e+06		770462	651432	528975	797633	844116	739187	947429		SM d42:3 (d14:2/28:1)	656450	791361	1.39273e+06	754176		257135	167963	564690	134837		114994	83981.5	230534	50963.6
19	UHPLC/MS/MS Data	SM d43:1 (d18:1/25:0)		Peak Area/mg protein	85273.9	134915	2843.67	3255.81	1421.21		121409	1.40222e+06	1.12872e+06	739489		108451	14313.1	566009	764601	1.71569e+06	1.68915e+06		429921	371906	236493	2.19281e+06	720680	983246	3.25452e+06		SM d43:1 (d18:1/25:0)	45541.9	847960	809702	1.16994e+06		61490	555480	745662	1.13168e+06		27499.2	277740	304415	427736
1	UHPLC/MS/MS Data	9(S)-HODE		Peak Area/mg protein	538000	275077	423372	168690	334079		47657.9	51510.2	36272.7	46344.1		54584.6	42365.4	39807.7	35333.3	30708.9	27147.5		67980	71276.3	46617.3	29843.8	58783.1	39873.2	34191.5		9(S)-HODE	347844	45446.2	38324.6	49795		140929	6496.73	9744.63	16446.8		63025.5	3248.37	3978.23	6216.32
2	UHPLC/MS/MS Data	13(S)-HODE		Peak Area/mg protein	539700	292923	429767	178571	345789		56736.8	44346.9	30988.6	52021.5		48215.4	53230.8	51769.2	33228.1	26151.9	30590.2		92660	74723.7	58321	38093.8	54590.4	36732.4	32936.2		13(S)-HODE	357350	46023.5	40530.9	55436.8		136695	11248.8	11878.9	22073.7		61131.8	5624.42	4849.55	8343.09
3	UHPLC/MS/MS Data	12,13-DiHOME		Peak Area/mg protein	292200	210000	252558	194286	284211		39394.7	33908.2	21784.1	38322.6		24861.5	27576.9	16756.4	19491.2	26253.2	20262.3		59540	40210.5	32185.2	25229.2	58156.6	41436.6	29297.9		12,13-DiHOME	246651	33352.4	22533.6	40865.1		43605.5	8069.43	4300.71	13553.2		19501	4034.72	1755.76	5122.61
4	UHPLC/MS/MS Data	6-keto PGF1a		Peak Area/mg protein	706.2	737.846	2906.98	2165.48	944.605		3221.05	3684.69	6472.73	4602.15		8066.15	9911.54	3791.03	10407	6117.72	6677.05		3802	5182.89	3816.05	4011.46	2708.43	240.704	3376.6		6-keto PGF1a	1492.22	4495.16	7495.08	3305.45		992.673	1437.87	2487.21	1542.98		443.937	718.936	1015.4	583.191
5	UHPLC/MS/MS Data	TbxB2		Peak Area/mg protein	342.2	118.385	5165.12	691.31	257.105		1061.05	3390.82	1906.82	4086.02		1338.77	14751.9	1416.67	1610.7	1069.87	2365.57		1560.4	142.105	421.605	4589.58	3248.19	530.282	745.532		TbxB2	1314.82	2611.18	3758.92	1605.39		2162.74	1376.23	5403.27	1685.43		967.206	688.114	2205.88	637.032
6	UHPLC/MS/MS Data	PGD2		Peak Area/mg protein	142.7	216.769	136.395	193.452	533.158		524.737	94.449	120.114	80		430.615	226.346	64.0641	380.351	47.2405	327.541		325.6	452.105	70	65.1042	354.94	373.38	220.106		PGD2	244.495	204.825	246.026	265.891		164.885	213.919	162.342	151.937		73.7388	106.959	66.2757	57.4269
7	UHPLC/MS/MS Data	PGE2		Peak Area/mg protein	203.7	250	354.302	112.714	200		362.632	618.878	153.523	89.043		366.923	80	177.051	212.105	73.1013	128.197		121.46	66.8684	222.963	70.8229	39.8313	40	244.468		PGE2	224.143	306.019	172.896	115.202		88.0727	239.039	109.351	85.6378		39.3873	119.52	44.6422	32.3681
8	UHPLC/MS/MS Data	5-HETE		Peak Area/mg protein	46220	46769.2	55848.8	38714.3	39013.2		78605.3	58479.6	55590.9	59505.4		41569.2	44596.2	42294.9	45877.2	50227.8	42590.2		26640	16144.7	17851.9	20312.5	24337.3	22309.9	12148.9		5-HETE	45313.1	63045.3	44525.9	19963.6		7021.01	10504.9	3218.99	4990.71		3139.89	5252.44	1314.15	1886.31
9	UHPLC/MS/MS Data	12-HETE		Peak Area/mg protein	7670	4129.23	13976.7	3383.33	8703.95		13031.6	4150	9070.45	4592.47		13435.4	11257.7	4498.72	5163.16	2946.84	8678.69		5782	1826.32	893.951	4580.21	1937.35	1208.87	2602.13		12-HETE	7572.65	7711.13	7663.41	2690.12		4234.07	4185.79	4141.93	1819.94		1893.53	2092.9	1690.94	687.872
10	UHPLC/MS/MS Data	15-HETE		Peak Area/mg protein	15500	8626.15	12314	6366.67	11890.8		10734.2	10155.1	11304.5	11473.1		10589.2	9975	8343.59	9643.86	9132.91	11149.2		4402	3019.74	3191.36	2346.88	3980.72	3090.14	2427.66		15-HETE	10939.5	10916.7	9805.63	3208.36		3530.39	598.153	1006.39	755.294		1578.84	299.076	410.858	285.474
11	UHPLC/MS/MS Data	20-HETE		Peak Area/mg protein	3342	8118.46	5584.88	7401.19	6351.32		18915.8	4555.1	2509.09	4183.87		7746.15	8240.38	6423.08	10257.9	7418.99	10931.1		6456	5692.11	5229.63	5859.38	6331.33	4560.56	5704.26		20-HETE	6159.57	7540.96	8502.94	5690.46		1849.64	7635.27	1738.88	647.369		827.182	3817.63	709.894	244.682
12	UHPLC/MS/MS Data	11,12-EET		Peak Area/mg protein	3821	3470.77	3517.44	2161.9	4851.32		5547.37	2893.88	2847.73	4078.49		2843.08	3503.85	2805.13	3161.4	1972.15	2091.8		1690.4	606.579	709.012	870.312	986.024	1232.54	859.468		11,12-EET	3564.49	3841.87	2729.57	993.476		961.764	1271.71	597.496	366.662		430.114	635.854	243.927	138.585
13	UHPLC/MS/MS Data	14,15-EET		Peak Area/mg protein	1977	1276.15	2030.23	1964.29	2088.16		2984.21	1889.8	2426.14	2120.43		1783.08	2038.46	1584.62	2247.37	2211.39	1515.9		1538.6	856.184	862.099	595.417	898.675	1289.3	506.064		14,15-EET	1867.17	2355.14	1896.8	935.191		333.998	473.429	315.408	365.606		149.369	236.714	128.765	138.186
14	UHPLC/MS/MS Data	14,15-DiHET		Peak Area/mg protein	145400	109123	139651	120595	152237		60500	81663.3	50886.4	95946.2		37892.3	45653.8	30974.4	42649.1	65139.2	36557.4		41980	22381.6	24592.6	16343.8	43722.9	38183.1	18680.9		14,15-DiHET	133401	72249	43144.4	29412.1		17966.9	20368.2	11911.3	11534.6		8035.03	10184.1	4862.78	4359.66
15	UHPLC/MS/MS Data	8,9-EpETE		Peak Area/mg protein	878	559.385	1304.65	589.286	506.316		60.7368	180.204	127.045	71.129		245.538	84.2885	28.8846	118.947	50	47.4754		1890.4	652.237	842.222	748.438	1169.4	1666.2	670.745		8,9-EpETE	767.527	109.779	95.8557	1091.38		333.178	55.2472	80.0006	504.051		149.002	27.6236	32.6601	190.513
16	UHPLC/MS/MS Data	14,15-EpETE		Peak Area/mg protein	1850	585.077	1791.86	1144.29	1059.74		408.684	178.878	217.045	293.118		147.631	150.5	24.3462	35	96.7342	60.2295		2192	1204.61	2298.77	1175	2895.18	4495.77	1109.57		14,15-EpETE	1286.19	274.431	85.7401	2195.84		533.048	101.319	55.0268	1224.34		238.386	50.6596	22.4646	462.756
17	UHPLC/MS/MS Data	17,18-EpETE		Peak Area/mg protein	3418	1995.38	4544.19	1784.52	1931.58		255.5	450.816	212.045	436.559		228.923	129.712	152.821	391.579	182.278	6.29508		9230	1893.42	3376.54	588.854	4420.48	1293.38	415.426		17,18-EpETE	2734.73	338.73	181.935	3031.16		1207.85	122.624	126.951	3098.29		540.165	61.3121	51.8276	1171.04
18	UHPLC/MS/MS Data	5,6-DiHETE		Peak Area/mg protein	11650	6230.77	7719.77	4057.14	4689.47		252.579	1096.94	285	1126.88		42.2615	61.25	64.2179	313.333	395.316	151.623		10610	4797.37	6254.32	4532.29	13819.3	11847.9	6677.66		5,6-DiHETE	6869.43	690.35	171.334	8362.69		3026.8	487.109	148.978	3688.71		1353.62	243.555	60.8201	1394.2
19	UHPLC/MS/MS Data	8,9-DiHETE		Peak Area/mg protein	9677	4952.31	7019.77	3909.52	4806.58		855.263	1224.49	647.045	947.527		608.462	633.846	161.667	395.965	389.62	202.295		9934	3365.79	4762.96	3581.25	13204.8	11074.6	5728.72		8,9-DiHETE	6073.04	918.581	398.642	7378.88		2314.39	239.554	197.05	3962.78		1035.03	119.777	80.4453	1497.79
20	UHPLC/MS/MS Data	11,12-DiHETE		Peak Area/mg protein	25880	14410.8	17697.7	13988.1	13381.6		1661.84	2656.12	1488.64	2790.32		1085.85	2330.77	1064.87	873.684	1223.54	800		35560	12014.5	14654.3	9116.67	36265.1	32380.3	18468.1		11,12-DiHETE	17071.6	2149.23	1229.79	22637		5200.58	668.798	560.65	11721.8		2325.77	334.399	228.884	4430.41
21	UHPLC/MS/MS Data	17,18-DiHETE		Peak Area/mg protein	12280	6189.23	9467.44	7619.05	6259.21		1620.26	2241.84	1254.55	2206.45		1169.23	1155.38	1091.54	909.298	1778.48	997.541		23120	6200	8856.79	6317.71	17204.8	15929.6	11148.9		17,18-DiHETE	8362.99	1830.77	1183.58	12682.5		2562.58	478.351	307.643	6317.4		1146.02	239.176	125.595	2387.75
22	UHPLC/MS/MS Data	Resolvin E1		Peak Area/mg protein	68.02	28.2615	15.0233	67.9762	230.658		110	70.3061	89.3864	62.3118		68.5077	26.1538	8.17051	50.5439	83.9747	33.0656		73.56	7.73158	67.5432	34.9896	63.759	10	24.0532		Resolvin E1	81.9878	83.0011	45.0694	40.2338		86.4074	21.2832	28.1296	27.8976		38.6426	10.6416	11.4838	10.5443
23	UHPLC/MS/MS Data	7,8-EpDPA		Peak Area/mg protein	1323	1264.31	1128.6	1144.52	1126.18		881.053	567.857	900.568	527.634		320.615	241.154	474.103	262.105	101.544	244.098		1694	1260.39	1800	645.521	892.53	869.014	1440.43		7,8-EpDPA	1197.32	719.278	273.937	1228.84		90.6261	198.908	121.712	441.815		40.5292	99.4538	49.6888	166.99
24	UHPLC/MS/MS Data	10,11-EpDPA		Peak Area/mg protein	4535	3403.08	4715.12	3932.14	4325		2373.42	1352.04	2729.55	2400		1240.92	1869.81	685.385	1678.77	1551.9	1309.18		14484	4031.58	6008.64	6358.33	8002.41	12759.2	5034.04		10,11-EpDPA	4182.07	2213.75	1389.33	8096.88		524.028	596.873	415.945	3996.5		234.352	298.436	169.809	1510.53
25	UHPLC/MS/MS Data	13,14-EpDPA		Peak Area/mg protein	733.4	868.308	623.488	683.69	564.737		386.842	343.571	344.205	220		176	187.404	169.615	164.947	160.253	251.475		2132	411.316	687.16	351.458	882.41	1109.01	359.574		13,14-EpDPA	694.725	323.655	184.949	847.562		115.888	72.0091	33.9321	635.038		51.8267	36.0045	13.8527	240.022
26	UHPLC/MS/MS Data	16,17-EpDPA		Peak Area/mg protein	1381	1500.46	1398.84	1536.9	1049.61		870	550	1001.7	984.301		608	862.5	444.487	675.965	738.861	409.016		5728	1853.95	2440.74	2434.38	2515.66	4426.76	1821.28		16,17-EpDPA	1373.36	851.501	623.138	3031.54		192.631	209.318	174.052	1474.27		86.147	104.659	71.0563	557.221
27	UHPLC/MS/MS Data	19,20-EpDPA		Peak Area/mg protein	4478	4329.23	5761.63	4588.1	4239.47		3010.53	1903.06	2737.5	2188.17		2350.77	2203.85	1178.33	2247.37	2213.92	1354.59		16916	5206.58	7982.72	6260.42	7824.1	13450.7	6907.45		19,20-EpDPA	4679.29	2459.81	1924.81	9221.14		619.732	504.697	515.618	4297.7		277.152	252.348	210.5	1624.38
28	UHPLC/MS/MS Data	7,8-DiHDPA		Peak Area/mg protein	6300	3356.92	4116.28	3336.9	4727.63		447.105	1053.06	472.159	956.022		552.923	364.808	412.051	512.281	841.139	445.082		5124	1761.84	2412.35	1912.5	4971.08	4522.54	2711.7		7,8-DiHDPA	4367.55	732.087	521.381	3345.14		1225.84	317.253	170.653	1473.37		548.213	158.626	69.6689	556.882
29	UHPLC/MS/MS Data	10,11-DiHDPA		Peak Area/mg protein	28000	18584.6	21709.3	15464.3	20486.8		3252.63	5340.82	2771.59	5797.85		3130.77	3859.62	2487.18	2578.95	3898.73	2504.92		25740	8926.32	10645.7	7661.46	22265.1	21084.5	11840.4		10,11-DiHDPA	20849	4290.72	3076.69	15451.9		4640.33	1501.06	665.409	7341.74		2075.22	750.529	271.652	2774.92
30	UHPLC/MS/MS Data	13,14-DiHDPA		Peak Area/mg protein	30970	24569.2	33034.9	30381	30000		8578.95	8569.39	6960.23	12279.6		5355.38	8469.23	5192.31	6582.46	9412.66	5691.8		44120	11976.3	20963	10958.3	31144.6	35197.2	20021.3		13,14-DiHDPA	29791	9097.03	6783.97	24911.5		3145.29	2253.98	1763.96	12350		1406.62	1126.99	720.134	4667.84
31	UHPLC/MS/MS Data	16,17-DiHDPA		Peak Area/mg protein	43070	36323.1	51662.8	50095.2	45868.4		14507.9	14846.9	12238.6	21731.2		9869.23	13301.9	7132.05	10950.9	16101.3	9950.82		84160	20355.3	39975.3	22437.5	60988	68788.7	36819.1		16,17-DiHDPA	45403.9	15831.2	11217.7	47646.3		6109.55	4100.25	3110.64	24202.6		2732.28	2050.13	1269.91	9147.74
32	UHPLC/MS/MS Data	19,20-DiHDPA		Peak Area/mg protein	48900	41707.7	59488.4	55428.6	48960.5		17489.5	18418.4	13659.1	23881.7		11589.2	14898.1	8533.33	11682.5	17253.2	10396.7		99580	24052.6	47691.4	30500	70445.8	83521.1	49638.3		19,20-DiHDPA	50897	18362.2	12392.2	57918.5		6828.77	4217	3160.05	27748.7		3053.92	2108.5	1290.09	10488
33	UHPLC/MS/MS Data	Resolvin D1		Peak Area/mg protein	89.98	60.8462	109.384	249.881	167.5		339.737	147.653	134.886	140.43		187.846	412.115	183.974	181.579	198.861	38.8525		324.6	281.579	210.123	190	243.976	226.056	107.872		Resolvin D1	135.518	190.677	200.538	226.315		74.8905	99.5109	119.754	69.084		33.492	49.7554	48.8893	26.1113
34	UHPLC/MS/MS Data	PDX		Peak Area/mg protein	767.1	491.846	941.395	152.143	274.737		9.49737	64.8878	54.5	71.3333		327.846	39.5192	208.205	60.2807	37.2025	37.2951		1638.8	313.421	794.938	503.229	751.446	565.352	495.426		PDX	525.444	50.0546	118.391	723.23		329.678	27.9133	122.232	435.387		147.436	13.9567	49.9011	164.561
