# Supplementary material for: A Lipidomic Analysis of Docosahexaenoic Acid (22:6, ω3) Mediated Attenuation of Western Diet Induced Nonalcoholic Steatohepatitis in Male Ldlr -/- Mice
Source: Metabolites. 2019 Oct 28;9(11):252. doi: 10.3390/metabo9110252 (PMC6918288; doi:10.3390/metabo9110252)
Supplement: Supplementary file 1 [file metabolites-09-00252-s001.zip › Table S2 ANOVA of Lipid Data.xlsx]

## Sheet: anova_posthoc
Table S2: ANOVA of Lipid data
ANOVA LIPIDS	f.value		p.value	minus Log 10 P		FDR		Tukey's HSD
PC 365 160/205	159.93		3.6628e-13	12.436		1.1135e-10		WDD30-RD30; WDD30-WD22; WDO30-WDD30
12,13-DiHOME	118.77		4.7409e-12	11.324		7.2062e-10		WD22-RD30; WDD30-RD30; WDO30-RD30
Lyso PC 203 w6	79.054		1.4753e-10	9.8311		1.4797e-08		WD22-RD30; WDD30-RD30; WDO30-RD30; WDD30-WD22; WDO30-WDD30
PG 4412 226/226	76.434		1.953e-10	9.7093		1.4797e-08		WDD30-RD30; WDD30-WD22; WDO30-WDD30
PC 205e 185e/20	73.717		2.6375e-10	9.5788		1.4797e-08		WDD30-RD30; WDD30-WD22; WDO30-WDD30
PE 405 181/224	72.816		2.9204e-10	9.5346		1.4797e-08		WD22-RD30; WDD30-RD30; WDO30-RD30; WDD30-WD22; WDO30-WD22; WDO30-WDD30
PC 204e 184e/20	70.524		3.8046e-10	9.4197		1.6523e-08		WD22-RD30; WDO30-RD30; WDD30-WD22; WDO30-WDD30
PG 428 204/224	63.663		8.8281e-10	9.0541		3.0122e-08		WDD30-RD30; WDD30-WD22; WDO30-WDD30
PC 375 131/244	63.584		8.9177e-10	9.0497		3.0122e-08		WDD30-RD30; WDD30-WD22; WDO30-WDD30
Lyso PC 226 w3	61.576		1.1593e-09	8.9358		3.5243e-08		WD22-RD30; WDD30-RD30; WDO30-RD30; WDD30-WD22; WDO30-WDD30
PE 406e 181e/225	60.204		1.393e-09	8.8561		3.8497e-08		WD22-RD30; WDD30-RD30; WDO30-RD30
Lyso PC 224 w6	59.235		1.5896e-09	8.7987		4.0269e-08		WD22-RD30; WDO30-RD30; WDD30-WD22; WDO30-WD22; WDO30-WDD30
PS 365 160/205	55.927		2.5331e-09	8.5964		5.9235e-08		WDD30-RD30; WDD30-WD22; WDO30-WDD30
C204 w6	54.659		3.0483e-09	8.5159		6.6191e-08		WDD30-RD30; WDD30-WD22; WDO30-WDD30
14,15-DiHET	52.427		4.2638e-09	8.3702		8.6414e-08		WD22-RD30; WDD30-RD30; WDO30-RD30; WDD30-WD22; WDO30-WD22
C205 w3	50.828		5.4658e-09	8.2623		1.0385e-07		WD22-RD30; WDD30-RD30; WDO30-RD30; WDD30-WD22; WDO30-WDD30
PE 224e 204e/20	50.2		6.0373e-09	8.2192		1.0796e-07		WD22-RD30; WDO30-RD30; WDD30-WD22; WDO30-WDD30
PE 385e 181e/204	48.686		7.7075e-09	8.1131		1.3017e-07		WD22-RD30; WDD30-RD30; WDO30-RD30
PE 365 160/205	48.141		8.4297e-09	8.0742		1.3031e-07		WDD30-RD30; WDD30-WD22; WDO30-WDD30
PC 214e 184e/30	48.039		8.5731e-09	8.0669		1.3031e-07		WD22-RD30; WDO30-RD30; WDD30-WD22; WDO30-WDD30
PC 384 180/204	47.524		9.3394e-09	8.0297		1.352e-07		WDD30-RD30; WDD30-WD22; WDO30-WDD30
Lyso PE 203 w6	46.47		1.1158e-08	7.9524		1.5418e-07		WD22-RD30; WDO30-RD30; WDD30-WD22; WDO30-WDD30
Lyso PC 181 w9	44.993		1.4403e-08	7.8416		1.9037e-07		WD22-RD30; WDD30-RD30; WDO30-RD30; WDO30-WD22; WDO30-WDD30
Lyso PE 226 w3	44.59		1.5464e-08	7.8107		1.9587e-07		WDD30-RD30; WDO30-RD30; WDD30-WD22; WDO30-WDD30
5-HETE	42.746		2.1549e-08	7.6666		2.6152e-07		WD22-RD30; WDD30-RD30; WDD30-WD22; WDO30-WD22; WDO30-WDD30
C181 w7	42.543		2.2367e-08	7.6504		2.6152e-07		WD22-RD30; WDO30-RD30; WDD30-WD22; WDO30-WDD30
PC 181e 161e/20	41.356		2.7906e-08	7.5543		3.0285e-07		WD22-RD30; WDD30-RD30; WDO30-RD30
C183 w3	41.173		2.8887e-08	7.5393		3.0285e-07		WD22-RD30; WDD30-RD30; WDO30-RD30
PS 403 240/163	41.173		2.8891e-08	7.5392		3.0285e-07		WD22-RD30; WDD30-RD30; WDO30-RD30
Lyso PI 205 w3	40.935		3.0226e-08	7.5196		3.0629e-07		WDD30-RD30; WDD30-WD22; WDO30-WDD30
Lyso PE 224 w6	40.314		3.4043e-08	7.468		3.3384e-07		WD22-RD30; WDO30-RD30; WDD30-WD22; WDO30-WD22; WDO30-WDD30
PE 395 191/204	39.586		3.9221e-08	7.4065		3.726e-07		WD22-RD30; WDD30-RD30; WDO30-RD30; WDD30-WD22; WDO30-WDD30
Lyso PS 204 w6	37.346		6.1514e-08	7.211		5.6667e-07		WD22-RD30; WDO30-RD30; WDD30-WD22; WDO30-WDD30
PC 394 190/204	36.576		7.2179e-08	7.1416		6.4536e-07		WD22-RD30; WDO30-RD30; WDD30-WD22; WDO30-WDD30
PE 246e 226e/20	36.4		7.49e-08	7.1255		6.5056e-07		WD22-RD30; WDD30-RD30; WDO30-RD30; WDD30-WD22; WDO30-WDD30
PC 384 181/203	35.581		8.9156e-08	7.0499		7.5287e-07		WD22-RD30; WDO30-RD30; WDD30-WD22; WDO30-WD22; WDO30-WDD30
Lyso PE 205 w3	34.763		1.0644e-07	6.9729		8.6626e-07		WDD30-RD30; WDD30-WD22; WDO30-WDD30
PC 385 180/205	34.654		1.0903e-07	6.9625		8.6626e-07		WDD30-RD30; WDO30-RD30; WDD30-WD22; WDO30-WD22; WDO30-WDD30
PC 374 151/223	34.567		1.1113e-07	6.9542		8.6626e-07		WD22-RD30; WDO30-RD30; WDD30-WD22; WDO30-WDD30
PE 201e 141e/60	33.945		1.2755e-07	6.8943		9.6941e-07		WD22-RD30; WDD30-RD30; WDO30-RD30
Lyso PS 226 w3	33.576		1.3855e-07	6.8584		1.0273e-06		WDD30-RD30; WDD30-WD22; WDO30-WDD30
Lyso PI 226 w3	33.186		1.5134e-07	6.82		1.0954e-06		WDD30-RD30; WDD30-WD22; WDO30-WDD30
PE 343e 161e/182	32.948		1.598e-07	6.7964		1.1092e-06		WD22-RD30; WDD30-RD30; WDO30-RD30
PC 191e 141e/50	32.868		1.6276e-07	6.7884		1.1092e-06		WD22-RD30; WDD30-RD30; WDO30-RD30
C182 w6	32.83		1.6419e-07	6.7847		1.1092e-06		WD22-RD30; WDD30-RD30; WDO30-RD30
PC 170e 140e/30	31.94		2.0191e-07	6.6948		1.3344e-06		WD22-RD30; WDD30-RD30; WDO30-RD30; WDO30-WD22; WDO30-WDD30
PC 386e 160e/226	31.349		2.3225e-07	6.634		1.5022e-06		WDD30-RD30; WDD30-WD22; WDO30-WDD30
PI 362 181/181	31.247		2.3797e-07	6.6235		1.5072e-06		WD22-RD30; WDD30-RD30; WDO30-RD30
PI 406 180/226	30.954		2.5531e-07	6.5929		1.584e-06		WDD30-RD30; WDD30-WD22; WDO30-WDD30
PE 384 160/224	30.729		2.6962e-07	6.5692		1.6393e-06		WD22-RD30; WDO30-RD30; WDD30-WD22; WDO30-WDD30
PS 406 180/226	28.323		4.9307e-07	6.3071		2.9391e-06		WD22-RD30; WDD30-RD30; WDO30-RD30; WDD30-WD22; WDO30-WDD30
13S-HODE	28.234		5.0466e-07	6.297		2.9496e-06		WD22-RD30; WDD30-RD30; WDO30-RD30
PI 386 160/226	28.162		5.1424e-07	6.2888		2.9496e-06		WDD30-RD30; WDD30-WD22; WDO30-WDD30
PE 364 182/182	27.989		5.3792e-07	6.2693		3.0283e-06		WD22-RD30; WDD30-RD30; WDO30-RD30
PS 423 260/163	27.856		5.5709e-07	6.2541		3.0714e-06		WD22-RD30; WDD30-RD30; WDO30-RD30; WDD30-WD22; WDO30-WDD30
PE 404 200/204	27.732		5.7554e-07	6.2399		3.0714e-06		WDD30-RD30; WDO30-RD30; WDD30-WD22; WDO30-WD22; WDO30-WDD30
C201 w9	27.73		5.7589e-07	6.2397		3.0714e-06		WD22-RD30; WDO30-RD30; WDD30-WD22; WDO30-WDD30
C226 w3	27.425		6.2433e-07	6.2046		3.2723e-06		WDD30-RD30; WDD30-WD22; WDO30-WDD30
PC 213e 183e/30	27.024		6.9519e-07	6.1579		3.582e-06		WD22-RD30; WDD30-RD30; WDO30-RD30; WDO30-WDD30
PI 361 180/181	26.917		7.1552e-07	6.1454		3.6253e-06		WDD30-RD30; WDO30-RD30; WDD30-WD22; WDO30-WDD30
PE 385 181/204	26.691		7.6077e-07	6.1187		3.7914e-06		WD22-RD30; WDO30-RD30; WDD30-WD22; WDO30-WDD30
PG 405 181/224	26.551		7.9044e-07	6.1021		3.8398e-06		WD22-RD30; WDO30-RD30; WDD30-WD22; WDO30-WD22; WDO30-WDD30
PI 365 160/205	26.527		7.9575e-07	6.0992		3.8398e-06		WDD30-RD30; WDD30-WD22; WDO30-WDD30
9S-HODE	26.112		8.9196e-07	6.0497		4.2125e-06		WD22-RD30; WDD30-RD30; WDO30-RD30
PG 385 181/204	26.077		9.007e-07	6.0454		4.2125e-06		WD22-RD30; WDO30-RD30; WDD30-WD22; WDO30-WD22; WDO30-WDD30
15-HETE	25.944		9.3476e-07	6.0293		4.3056e-06		WDD30-RD30; WDD30-WD22; WDO30-WDD30
PA 362 181/181	25.498		1.0592e-06	5.975		4.8059e-06		WD22-RD30; WDD30-RD30; WDO30-RD30
PE 405 180/225	25.403		1.088e-06	5.9634		4.8638e-06		WDD30-RD30; WDO30-RD30; WDD30-WD22; WDO30-WD22; WDO30-WDD30
C183 w6	25.062		1.1991e-06	5.9211		5.2831e-06		WD22-RD30; WDD30-RD30; WDO30-RD30
PA 406 180/226	24.708		1.3277e-06	5.8769		5.7658e-06		WD22-RD30; WDD30-RD30; WDO30-RD30; WDD30-WD22; WDO30-WDD30
PI 407 181/226	24.402		1.4515e-06	5.8382		6.2148e-06		WDD30-RD30; WDD30-WD22; WDO30-WDD30
PG 406 181/225	24.276		1.5061e-06	5.8221		6.3591e-06		WD22-RD30; WDO30-RD30; WDD30-WD22; WDO30-WD22; WDO30-WDD30
PG 384 181/203	24.1		1.586e-06	5.7997		6.6046e-06		WD22-RD30; WDO30-RD30; WDD30-WD22; WDO30-WD22; WDO30-WDD30
PC 363 181/182	24.016		1.6261e-06	5.7889		6.6517e-06		WD22-RD30; WDD30-RD30; WDO30-RD30; WDD30-WD22; WDO30-WD22
PC 406 180/226	23.985		1.641e-06	5.7849		6.6517e-06		WD22-RD30; WDD30-RD30; WDO30-RD30; WDD30-WD22; WDO30-WDD30
PE 385 180/205	23.662		1.8066e-06	5.7431		7.2265e-06		WDD30-RD30; WDD30-WD22; WDO30-WDD30
Lyso PE 181 w9	23.501		1.8961e-06	5.7221		7.4861e-06		WD22-RD30; WDD30-RD30; WDO30-RD30
PE 375 171/204	23.363		1.9768e-06	5.704		7.7045e-06		WD22-RD30; WDO30-RD30; WDD30-WD22; WDO30-WDD30
PE 396 170/226	23.289		2.0221e-06	5.6942		7.7811e-06		WDD30-RD30; WDD30-WD22; WDO30-WDD30
PC 406e 180e/226	23.202		2.0763e-06	5.6827		7.8899e-06		WD22-RD30; WDD30-RD30; WDD30-WD22; WDO30-WDD30
PE 385 160/225	23.105		2.1386e-06	5.6699		8.0262e-06		WD22-RD30; WDO30-RD30; WDD30-WD22; WDO30-WDD30
PC 160e 140e/20	22.809		2.3418e-06	5.6305		8.6817e-06		WD22-RD30; WDD30-RD30; WDO30-RD30; WDO30-WD22; WDO30-WDD30
PS 383 180/203	22.31		2.7347e-06	5.5631		1.0016e-05		WDD30-RD30; WDD30-WD22; WDO30-WDD30
Lyso PE 204 w6	22.262		2.7763e-06	5.5565		1.0047e-05		WD22-RD30; WDO30-RD30; WDD30-WD22; WDO30-WDD30
PA 382 141/241	22.027		2.99e-06	5.5243		1.0694e-05		WD22-RD30; WDD30-RD30; WDO30-RD30
C225 w3	21.67		3.3504e-06	5.4749		1.1843e-05		WDD30-RD30; WDD30-WD22; WDO30-WDD30
PG 381 200/181	21.531		3.5044e-06	5.4554		1.2245e-05		WDO30-RD30; WDO30-WD22; WDO30-WDD30
PG 362 181/181	21.338		3.7294e-06	5.4284		1.2884e-05		WD22-RD30; WDO30-RD30; WDO30-WD22; WDO30-WDD30
Lyso PC 161 w7	21.108		4.0199e-06	5.3958		1.3731e-05		WD22-RD30; WDD30-RD30; WDO30-RD30
PG 382 181/201	20.62		4.7237e-06	5.3257		1.5956e-05		WD22-RD30; WDO30-RD30; WDO30-WD22; WDO30-WDD30
PE 381 180/201	20.359		5.1543e-06	5.2878		1.7219e-05		WD22-RD30; WDD30-RD30; WDO30-RD30
PI 386 181/205	20.249		5.349e-06	5.2717		1.7608e-05		WDD30-RD30; WDD30-WD22; WDO30-WDD30
PC 180e 160e/20	20.175		5.4862e-06	5.2607		1.7608e-05		WDD30-RD30; WDO30-RD30; WDD30-WD22; WDO30-WD22
Lyso PI 203 w6	20.168		5.4988e-06	5.2597		1.7608e-05		WD22-RD30; WDD30-RD30; WDO30-RD30
PG 4211 205/226	20.166		5.5023e-06	5.2595		1.7608e-05		WDD30-RD30; WDO30-RD30; WDD30-WD22; WDO30-WDD30
PI 394 190/204	20.057		5.7092e-06	5.2434		1.8079e-05		WDD30-RD30; WDD30-WD22; WDO30-WDD30
PE 426 200/226	19.961		5.9e-06	5.2291		1.8491e-05		WDD30-RD30; WDD30-WD22; WDO30-WDD30
PA 386 160/226	19.702		6.4491e-06	5.1905		2.0005e-05		WDD30-RD30; WDD30-WD22; WDO30-WDD30
PE 342 160/182	19.456		7.0232e-06	5.1535		2.1566e-05		WD22-RD30; WDD30-RD30; WDO30-RD30; WDO30-WDD30
PS 364 160/204	19.347		7.2936e-06	5.1371		2.2173e-05		WDO30-RD30; WDD30-WD22; WDO30-WDD30
PS 386 160/226	18.729		9.0769e-06	5.0421		2.732e-05		WDD30-RD30; WDD30-WD22; WDO30-WDD30
Lyso PC 225 w3	18.505		9.8412e-06	5.007		2.9331e-05		WDD30-RD30; WDD30-WD22; WDO30-WDD30
PC 331 160/171	18.455		1.002e-05	4.9991		2.9574e-05		WD22-RD30; WDD30-RD30; WDO30-RD30
PI 364 160/204	18.358		1.038e-05	4.9838		3.0341e-05		WD22-RD30; WDD30-RD30; WDO30-RD30
Lyso PC 160	18.107		1.1376e-05	4.944		3.2851e-05		WD22-RD30; WDD30-RD30; WDO30-RD30
PI 363 160/203	18.088		1.1455e-05	4.941		3.2851e-05		WD22-RD30; WDD30-RD30; WDO30-RD30; WDD30-WD22; WDO30-WDD30
PC 371 110/261	18.038		1.1668e-05	4.933		3.3151e-05		WD22-RD30; WDD30-RD30; WDO30-RD30
PC 407e 181e/226	17.945		1.2075e-05	4.9181		3.399e-05		WDD30-RD30; WDD30-WD22; WDO30-WDD30
7,8-DiHDPA	17.803		1.2727e-05	4.8953		3.5495e-05		WD22-RD30; WDO30-RD30; WDD30-WD22; WDO30-WDD30
PC 354 150/204	17.329		1.5208e-05	4.8179		4.1766e-05		WD22-RD30; WDO30-RD30; WDD30-WD22; WDO30-WDD30
SM d351 d140/211	17.322		1.525e-05	4.8167		4.1766e-05		WD22-RD30; WDD30-RD30; WDO30-RD30; WDO30-WD22; WDO30-WDD30
PE 361 180/181	17.204		1.595e-05	4.7972		4.3292e-05		WD22-RD30; WDD30-RD30; WDO30-RD30
PC 351 90/261	17.162		1.6205e-05	4.7903		4.3597e-05		WD22-RD30; WDD30-RD30; WDO30-RD30
C181 w9	16.971		1.744e-05	4.7584		4.6328e-05		WD22-RD30; WDD30-RD30; WDO30-RD30; WDO30-WDD30
SM d362 d140/222	16.958		1.7525e-05	4.7563		4.6328e-05		WD22-RD30; WDO30-RD30; WDO30-WDD30
10,11-DiHDPA	16.9		1.7921e-05	4.7466		4.6966e-05		WD22-RD30; WDO30-RD30; WDD30-WD22; WDO30-WDD30
PG 342 161/181	16.781		1.8769e-05	4.7265		4.8768e-05		WD22-RD30; WDO30-RD30; WDD30-WD22; WDO30-WDD30
PC 321 160/161	16.649		1.9757e-05	4.7043		5.0899e-05		WD22-RD30; WDD30-RD30; WDO30-RD30
PC 374 170/204	16.221		2.3388e-05	4.631		5.9749e-05		WDD30-RD30; WDD30-WD22; WDO30-WDD30
PE 404 180/224	15.994		2.5612e-05	4.5916		6.4885e-05		WDO30-RD30; WDD30-WD22; WDO30-WDD30
PS 385 180/205	15.889		2.6721e-05	4.5731		6.7134e-05		WDD30-RD30; WDD30-WD22; WDO30-WDD30
PG 365 161/204	15.814		2.7535e-05	4.5601		6.7674e-05		WD22-RD30; WDO30-RD30; WDD30-WD22; WDO30-WDD30
PC 341 160/181	15.813		2.755e-05	4.5599		6.7674e-05		WD22-RD30; WDD30-RD30; WDO30-RD30
PI 363 181/182	15.808		2.7604e-05	4.559		6.7674e-05		WD22-RD30; WDD30-RD30; WDO30-RD30
7,8-EpDPA	15.72		2.8611e-05	4.5435		6.9582e-05		WDO30-RD30; WDD30-WD22; WDO30-WDD30
11,12-EET	15.597		3.0087e-05	4.5216		7.2591e-05		WDD30-RD30; WDD30-WD22; WDO30-WDD30
14,15-EET	15.286		3.42e-05	4.466		8.1865e-05		WDD30-RD30; WDD30-WD22; WDO30-WDD30
5,6-DiHETE	15.251		3.4699e-05	4.4597		8.2411e-05		WD22-RD30; WDO30-RD30; WDD30-WD22; WDO30-WDD30
PG 363 181/182	14.633		4.5016e-05	4.3466		0.00010609		WDO30-RD30; WDD30-WD22; WDO30-WDD30
PC 363 160/203	14.517		4.7309e-05	4.3251		0.00011063		WD22-RD30; WDD30-RD30; WDO30-RD30
PI 385 181/204	14.428		4.9155e-05	4.3084		0.00011407		WD22-RD30; WDO30-RD30; WDD30-WD22; WDO30-WDD30
PE 362 181/181	14.384		5.0103e-05	4.3001		0.00011539		WD22-RD30; WDD30-RD30; WDO30-RD30
PC 385e 160e/225	14.273		5.2586e-05	4.2791		0.0001202		WD22-RD30; WDO30-RD30; WDO30-WDD30
PG 429 203/226	14.247		5.3173e-05	4.2743		0.00012063		WDO30-RD30; WDO30-WDD30
PA 364 160/204	13.889		6.2232e-05	4.206		0.00014014		WD22-RD30; WDD30-RD30; WDO30-RD30; WDO30-WD22
Lyso PC 180	13.83		6.3886e-05	4.1946		0.0001428		WDD30-RD30; WDO30-RD30; WDO30-WD22
PE 330e 140e/190	13.56		7.209e-05	4.1421		0.00015997		WD22-RD30; WDD30-RD30; WDO30-RD30
PE 387e 161e/226	13.504		7.392e-05	4.1312		0.00016284		WD22-RD30; WDO30-RD30; WDD30-WD22; WDO30-WDD30
PE 384e 160e/224	13.198		8.4976e-05	4.0707		0.00018585		WDO30-RD30; WDD30-WD22; WDO30-WDD30
PG 407 181/226	13.149		8.6893e-05	4.061		0.00018787		WDD30-RD30; WDO30-RD30; WDD30-WD22
PC 344 140/204	13.143		8.7138e-05	4.0598		0.00018787		WDO30-RD30; WDO30-WDD30
SM d341 d140/201	13.088		8.9369e-05	4.0488		0.00019132		WDD30-RD30; WDO30-RD30; WDO30-WD22
PC 396 171/225	12.942		9.5626e-05	4.0194		0.00020329		WDD30-RD30; WDD30-WD22; WDO30-WDD30
11,12-DiHETE	12.853		9.9689e-05	4.0014		0.00021045		WD22-RD30; WDO30-RD30; WDD30-WD22; WDO30-WDD30
8,9-EpETE	12.82		0.00010122	3.9948		0.0002122		WD22-RD30; WDO30-RD30; WDD30-WD22; WDO30-WDD30
13,14-DiHDPA	12.788		0.00010274	3.9883		0.00021392		WD22-RD30; WDO30-RD30; WDD30-WD22; WDO30-WDD30
PC 376 150/226	12.725		0.00010582	3.9754		0.00021885		WDD30-RD30; WDD30-WD22; WDO30-WDD30
Lyso PI 180	12.621		0.00011115	3.9541		0.0002283		WD22-RD30; WDD30-RD30; WDO30-RD30
PE 404e 180e/224	12.596		0.00011246	3.949		0.00022944		WDD30-RD30; WDD30-WD22; WDO30-WDD30
PC 361 180/181	12.559		0.00011444	3.9414		0.00023193		WDD30-RD30; WDO30-RD30; WDO30-WD22
PA 364 182/182	12.49		0.00011828	3.9271		0.00023813		WDD30-RD30; WDO30-RD30; WDO30-WD22
Lyso PE 180	12.443		0.00012095	3.9174		0.00024191		WD22-RD30; WDD30-RD30; WDO30-RD30
PS 404 180/224	12.398		0.00012359	3.908		0.00024557		WDO30-RD30; WDO30-WD22; WDO30-WDD30
Lyso PC 182 w6	12.352		0.00012632	3.8985		0.00024936		WD22-RD30; WDD30-RD30; WDO30-RD30
PC 341e 140e/201	12.23		0.00013397	3.873		0.00026276		WDO30-RD30; WDO30-WD22; WDO30-WDD30
17,18-DiHETE	12.174		0.00013759	3.8614		0.00026812		WDO30-RD30; WDD30-WD22; WDO30-WDD30
Lyso PC 204 w6	12.091		0.00014326	3.8439		0.0002774		WD22-RD30; WDO30-RD30; WDD30-WD22; WDO30-WDD30
PC 366 140/226	11.994		0.00015021	3.8233		0.00028901		WDD30-RD30; WDD30-WD22; WDO30-WDD30
PE 362 180/182	11.768		0.00016783	3.7751		0.00032089		WD22-RD30; WDD30-RD30; WDO30-RD30
PE 363 181/182	11.714		0.00017235	3.7636		0.00032747		WD22-RD30; WDD30-RD30; WDO30-RD30
6-keto PGF1a	11.672		0.00017598	3.7545		0.00033229		WDO30-RD30; WDO30-WDD30
PS 405 180/225	11.591		0.00018328	3.7369		0.00034393		WDD30-RD30; WDO30-WDD30
PC 352 131/221	11.406		0.00020107	3.6967		0.000375		WD22-RD30; WDO30-RD30; WDD30-WD22; WDO30-WDD30
8,9-DiHETE	11.233		0.00021944	3.6587		0.00040677		WD22-RD30; WDO30-RD30; WDD30-WD22; WDO30-WDD30
SM d331 d140/191	11.177		0.00022589	3.6461		0.00041618		WDD30-RD30; WDO30-RD30; WDO30-WD22
Lyso PE 225 w3	11.131		0.0002312	3.636		0.00042339		WDD30-RD30; WDO30-RD30; WDD30-WD22
PA 342 160/182	11.101		0.00023481	3.6293		0.00042744		WD22-RD30; WDD30-RD30; WDO30-RD30
19,20-DiHDPA	11.059		0.00023988	3.62		0.00043407		WD22-RD30; WDO30-RD30; WDD30-WD22; WDO30-WDD30
PE 407e 181e/226	10.938		0.00025535	3.5929		0.00045932		WD22-RD30; WDO30-RD30; WDD30-WD22
PA 363 181/182	10.904		0.00025989	3.5852		0.00046451		WDD30-RD30; WDO30-RD30; WDO30-WD22
19,20-EpDPA	10.892		0.00026149	3.5826		0.00046451		WDD30-RD30; WDD30-WD22; WDO30-WDD30
PG 386 182/204	10.882		0.00026282	3.5803		0.00046451		WDO30-RD30; WDO30-WDD30
PE 364 160/204	10.752		0.00028127	3.5509		0.00049426		WDD30-RD30; WDD30-WD22; WDO30-WDD30
PC 387 161/226	10.499		0.00032134	3.493		0.00056141		WDD30-RD30; WDD30-WD22; WDO30-WDD30
PC 407 181/226	10.451		0.00032976	3.4818		0.00057283		WDD30-RD30; WDD30-WD22; WDO30-WD22
14,15-EpETE	10.288		0.00035967	3.4441		0.00062125		WDD30-WD22; WDO30-WDD30
10,11-EpDPA	10.27		0.00036322	3.4398		0.00062384		WDD30-RD30; WDD30-WD22; WDO30-WDD30
PG 341 160/181	10.256		0.00036595	3.4366		0.000625		WDD30-RD30; WDO30-RD30
16,17-EpDPA	10.051		0.00040892	3.3884		0.00069448		WDD30-RD30; WDD30-WD22; WDO30-WDD30
PC 364 160/204	10.005		0.00041942	3.3774		0.00070835		WDO30-RD30; WDO30-WD22; WDO30-WDD30
C203 w6	9.9838		0.00042423	3.3724		0.00071253		WD22-RD30; WDO30-RD30; WDO30-WDD30
16,17-DiHDPA	9.9528		0.0004315	3.365		0.00072074		WD22-RD30; WDO30-RD30; WDD30-WD22; WDO30-WDD30
PG 4411 225/226	9.8603		0.000454	3.3429		0.00075419		WDD30-RD30; WDO30-RD30
C160	9.6382		0.00051356	3.2894		0.00084534		WD22-RD30; WDD30-RD30; WDO30-RD30
SM d422 d141/281	9.6351		0.00051443	3.2887		0.00084534		WDO30-RD30; WDO30-WD22; WDO30-WDD30
Lyso PI 181 w9	9.5223		0.00054803	3.2612		0.00089571		WD22-RD30; WDD30-RD30; WDO30-RD30
C140	9.3311		0.00061066	3.2142		0.00099272		WD22-RD30; WDD30-RD30; WDO30-RD30
PE 363 160/203	9.1605		0.00067327	3.1718		0.0010887		WD22-RD30; WDD30-RD30; WDO30-RD30
PE 343 161/182	8.9711		0.00075126	3.1242		0.0012084		WD22-RD30; WDD30-RD30; WDO30-RD30
PA 384 180/204	8.8957		0.00078506	3.1051		0.0012561		WDO30-RD30; WDO30-WDD30
PE 406 180/226	8.8375		0.00081229	3.0903		0.0012929		WDD30-RD30; WDD30-WD22; WDO30-WDD30
Lyso PE 160	8.7703		0.00084505	3.0731		0.001338		WDD30-RD30; WDO30-RD30; WDO30-WD22
PE 365e 161e/204	8.7473		0.00085663	3.0672		0.0013493		WD22-RD30; WDD30-RD30
PE 340e 180e/160	8.4952		0.00099535	3.002		0.0015597		WDO30-RD30
SM d342 d160/182	8.1568		0.0012223	2.9128		0.0019056		WDD30-RD30; WDO30-RD30; WDO30-WD22
Lyso PI 204 w6	8.0641		0.0012941	2.888		0.0020072		WD22-RD30; WDD30-RD30; WDO30-RD30
PG 384 180/204	8.0371		0.001316	2.8808		0.0020304		WDO30-RD30; WDO30-WD22; WDO30-WDD30
PC 384e 140e/244	8.0291		0.0013225	2.8786		0.0020304		WDO30-RD30; WDO30-WDD30
PG 364 160/204	7.9926		0.0013527	2.8688		0.0020665		WDO30-RD30; WDO30-WD22; WDO30-WDD30
PE 405e 180e/225	7.9829		0.0013609	2.8662		0.0020686		WD22-RD30; WDD30-WD22; WDO30-WDD30
PC 343 161/182	7.894		0.0014384	2.8421		0.0021647		WD22-RD30; WDD30-RD30; WDO30-RD30
SM d361 d141/220	7.5102		0.001834	2.7366		0.002733		WDO30-RD30
Lyso PC 220	7.4817		0.0018678	2.7287		0.0027646		WDO30-RD30; WDO30-WD22
PA 361 180/181	7.3258		0.0020658	2.6849		0.0030339		WDD30-RD30; WDO30-RD30; WDO30-WD22
PA 343 161/182	7.3112		0.0020855	2.6808		0.003048		WD22-RD30; WDO30-RD30
Lyso PI 224 w6	7.1937		0.0022517	2.6475		0.0032752		WD22-RD30; WDO30-RD30
SM d340 d140/200	7.1147		0.0023718	2.6249		0.0034334		WDD30-RD30; WDO30-RD30
Lyso PI 170	7.0346		0.0025009	2.6019		0.0036032		WD22-RD30; WDD30-RD30; WDO30-RD30
PE 340 160/180	6.9785		0.0025959	2.5857		0.0037225		WDD30-RD30; WDO30-RD30
Lyso PI 160	6.8742		0.0027834	2.5554		0.0039548		WD22-RD30; WDD30-RD30; WDO30-RD30
PC 320e 140e/180	6.8738		0.002784	2.5553		0.0039548		WDO30-RD30
Lyso PC 200	6.8435		0.0028412	2.5465		0.004013		WDD30-RD30; WDO30-RD30
Lyso PE 170	6.8382		0.0028513	2.545		0.004013		WD22-RD30; WDD30-RD30; WDO30-RD30
PE 341 160/181	6.8099		0.0029062	2.5367		0.0040714		WDD30-RD30; WDO30-RD30
PS 384 180/204	6.801		0.0029237	2.5341		0.0040771		WDO30-RD30; WDO30-WD22; WDO30-WDD30
PG 364 182/182	6.6641		0.0032081	2.4938		0.0044532		WDD30-RD30; WDO30-WDD30
PC 182e 162e/20	6.5795		0.0033989	2.4687		0.0046966		WDD30-RD30; WDD30-WD22; WDO30-WDD30
PA 385 180/205	6.5081		0.0035699	2.4473		0.0049106		WDD30-RD30; WDD30-WD22; WDO30-WDD30
PDX	6.4538		0.0037063	2.4311		0.0050753		WDD30-WD22; WDO30-WDD30
Lyso PC 201 w9	6.4372		0.003749	2.4261		0.0051107		WDD30-RD30; WDO30-RD30
C161 w7	6.2916		0.0041491	2.382		0.0056309		WD22-RD30; WDO30-RD30
C200	6.2518		0.0042665	2.3699		0.005739		WD22-RD30; WDD30-RD30; WDO30-RD30
Lyso PE 161 w7	6.1468		0.0045942	2.3378		0.0061526		WD22-RD30; WDD30-RD30; WDO30-RD30
PE 385e 160e/225	6.1288		0.0046531	2.3323		0.0062041		WDO30-RD30
PS 361 180/181	6.0973		0.0047583	2.3225		0.0063167		WDD30-RD30; WDO30-RD30
Lyso PE 182 w6	6.0139		0.0050497	2.2967		0.0066743		WDO30-RD30; WDO30-WDD30
Lyso PE 220	5.8056		0.0058675	2.2316		0.0077217		WDD30-RD30; WDO30-RD30
SM d423 d142/281	5.6876		0.0063951	2.1942		0.0083798		WDO30-RD30; WDO30-WDD30
PC 386 160/226	5.6411		0.0066176	2.1793		0.0086341		WDD30-WD22; WDO30-WDD30
PE 408e 182e/226	5.4456		0.0076495	2.1164		0.0099378		WDD30-WD22
PC 340e 140e/200	5.3325		0.0083268	2.0795		0.010772		WDO30-RD30
PE 407e 182e/225	5.2124		0.0091198	2.04		0.011748		WD22-RD30; WDD30-WD22
PE 386e 182e/204	5.1851		0.0093113	2.031		0.011944		WD22-RD30
PC 320 160/160	5.0544		0.010292	1.9875		0.013146		WDO30-RD30
SM d412 d141/271	4.8468		0.012095	1.9174		0.015384		WDO30-RD30
PE 382 181/201	4.7824		0.012723	1.8954		0.016115
PE 386 160/226	4.7402		0.013153	1.881		0.016591		WDD30-WD22; WDO30-WDD30
PC 383 180/203	4.7119		0.013451	1.8713		0.016897		WDO30-RD30
PS 385 181/204	4.6942		0.013641	1.8652		0.017065		WDO30-RD30; WDO30-WDD30
SM d391 d140/251	4.6515		0.014111	1.8504		0.017581		WDO30-WDD30
PE 364e 160e/204	4.5124		0.015775	1.802		0.019494		WDO30-WDD30
13,14-EpDPA	4.1494		0.021226	1.6731		0.026124		WDO30-WDD30
PE 365 161/204	4.1128		0.021881	1.6599		0.026822		WDD30-WD22
PE 384 180/204	4.0994		0.022128	1.6551		0.027015		WDD30-RD30
17,18-EpETE	3.6814		0.031548	1.501		0.038058
PC 340 160/180	3.6577		0.032202	1.4921		0.038693		WDO30-RD30
SM d411 d140/271	3.4582		0.038324	1.4165		0.045868
PC 364e 140e/224	3.4161		0.039776	1.4004		0.047419		WDO30-RD30
PE 362e 180e/182	3.3866		0.040824	1.3891		0.048478		WDO30-RD30
